# Supplementary material
Source: publisher figshare collection journal article supplement (https://springernature.figshare.com/ndownloader/files/21105720)
Supplement: Supplementary file 1 [file 21105720]

## Sheet: Original list
18758		Means and Methods of Control	Verhandlungen 7th int. Kongr. Ent., Berlin, 1938	The papers in this section include: Naturliches Kryolith (" Cryocid ") als Bekampfungsmittel [Natural Cryolite as a Means of Control], pp. 2961-2965, 6 refs., in which P. BOVIEN briefly reviews the results of experiments in Denmark with cryolite in dusts and sprays [cf. R.A.E., A 24 440; 25 766] and in cutworm baits [24 55]; Die Beziehungen zwischen der Wirkung von Spritz-mitteln und dent Bau des…	1938	4		2927-3079
18759		The Central Council to be replaced by a Forestry Board	Skogen	The Central Council of the Union of County Forestry Boards [Centralradet for skogsvardsstyrelsernas forbund] has to a large extent met the need for a central organ to direct private forestry in Sweden, but has not had sufficient official standing to deal adequately with all the problems arising in this sphere. In order to remedy this deficiency, a government measure has been proposed whereby the …	1941		28	99-101
18760		25 years in the service of plant breeding	Book	The history and the development of the work carried out under the administration of the Pajbjerg Fund in Denmark are described and thanks are expressed for additional financial and other support from various industrial concerns for co-operation in lupin breeding, tests of baking quality, etc. Methods of breeding are outlined in some detail with notes on a time-saving modification adopted in cross…	1945
18761		Report of the University of Hawaii Agricultural Experiment Station for the biennium ending June 30, 1948	Book	A general discussion on the introduction, selection and hybridization of tropical forage plants in Hawaii is included in addition to the following information pertaining to the breeding of separate crops. Perennial forage sorghum The objective of the project is to produce a high yielding, perennial sorghum with sweet juicy stems and resistance to rust. Active breeding work has been suspended but …	1948
18762		Report on forest research for the year ending March, 1949	Report on forest research for the year ending March, 1949.	In the section of this report [cf. R.A.M., 27, p. 591] dealing with pathology (pp. 12-18) T. R. PEACE states that a sclerotia-producing species of Botrytis was very prevalent in England during the period under review on nursery plants of Cupressus macrocarpa and Chamaecyparis lawsoniana, Sitka spruce [Picea sitchensis]. and Douglas fir [Pseudotsuga taxifolia[Pseudotsuga menziesii]]. while it also…	1950			80 pp.-80 pp.
18763		Record of the First Annual Convention of the British Wood Preserving Association, Cambridge, June 25th-27th, 1951	Record of the First Annual Convention of the British Wood Preserving Association, Cambridge, June 25th-27th, 1951.	In this report W. P. K. FINDLAY (pp. 3-10) discusses the problem of designing laboratory tests to indicate with a minimum of delay the value of any substance as a wood preservative [R.A.M., 31, p. 640]. After reviewing the desirable characteristics of an effective wood preservative and considering which of these substances can be submitted to laboratory tests, he concludes that it is possible by …	1952			iv-196
18764		Proceedings of the Seventh International Botanical Congress, Stockholm, 1950	Proceedings of the Seventh International Botanical Congress, Stockholm, 1950.	This publication [cf. R.A.M., 16, p. 480] contains abstracts of papers read at the sectional meetings of the Seventh International Botanical Congress, held at Stockholm in 1950. Much of the information contained therein has already been noticed in this Review. In the Agronomy section J. T. W. MONTAGNE, Amsterdam, (pp. 204-205) speaking on soil fumigation for the control of plant diseases and cond…	1953			899 pp.-899 pp.
18765		Equipment news	Unasylva	Descriptive notes with photographs, of the following among others: The Soil-Potta press (Clico Ltd., Meadow Works, Meadow Street, Sheffield, England); this produces earthen pots of the equivalent cubic content of a 3-in. (7.5-cm.) flowerpot. The usual compost or soil is used and the pots retain their shape when placed in seed trays etc. until the plant is ready for lining out. The SFI cultivator …	1953	7	4	178-9
18766		Report of the Rothamsted Experimental Station for 1961	Book	In the report from the Plant Path. Dept (P. H. GREGORY, pp, 103-121), some of the information from which has been noticed, H. F. DIAS & B. D. HARRISON state that viruses of the yellow mosaic [cf. 41, 201] and fanleaf [cf. 40, 263] type, respectively, from Portuguese vines could usually be differentiated by sap inoculation to Chenopodium amaranticolor. When re-transmitted to vine, 1 isolate from a…	1962
18767		Proceedings of the 10th International Grassland Congress, Helsinki, Finland, July 1966, pp. 1015	Proceedings of the 10th International Grassland Congress, Helsinki, Finland, July 1966, pp. 1015.	Plenary papers. VIRTANEN, A. I. (19-29), urea and ammonium salts in protein-free feeds for cows; efficiency of dairy farming in: CANDLER, W. (55-62), New Zealand; ANDERSEN, H. V. (62-66), Denmark, BoscH, S. (66-69), the Netherlands, COWARD, N. and HODGES, J. (70-77), the United Kingdom, HOGLUND, C. R. (78-84), America (U.S.) and JURISSON, I. (84-88), Estonian SSR. Summary of discussions on effici…	1966
18768		Disease-resistant poplars	Tidsskrift for Planteavl	In a collection of 32 European species. varieties and types. mostly belonging to Populus x beroli-nensis. Populus x canadensis and P. trichocarpa. which were tested in Denmark from 1961. only Populus x canadensis 'Bachelieri proved resistant to the pathogens Venturia. Marssonina and Melampsora and had at the same time such other desirable qualities as vigour of growth. large leaves. good leaf ret…	1969	73		426-28
18769		Disease-resistant Poplars	Tidsskrift for Planteavl	In a collection of 32 European species, varieties and types, mostly belonging to Populus X berolinensis, Populus X canadensis and P. trichocarpa, which were tested in Denmark from 1961, only Populus 'Bachelieri' proved resistant to the pathogens Venturia, Marssonina and Melampsora and had at the same time such other desirable qualities as vigour of growth, large leaves, good leaf retention and re…	1969	73		426-8
18770		International symposium on seed processing, Bergen, Norway 1973. II. Seed problems of developing countries	International symposium on seed processing, Bergen, Norway 1973. II. Seed problems of developing countries.	Volume 2 contains 31 papers: Exotic forest tree seed in Rhodesia (P.F. Banks and R.L. Barrett; 8 pp.; 10 ref.); Seed problems in Thailand (S. Bhumibhamon; 17 pp.; 35 ref.); Germination test on [a] Teak seeds from fertilized and unfertilized mother trees; [b] seeds from V-4 clone at Mae Moh Teak seed orchard, Lampang, Thailand (S. Boonkird; each 1 p. - summaries only); Problems of forestal seeds i…	1974
18771		The instructional forest of the Agricultural University of Vienna	Allgemeine Forstzeitung	A special issue with 2 introductions and 9 papers describing the Ofenbach instructional forest, Wiener Neustadt district, which was leased to the University in 1972 by the Austrian federal forest administration (which retains responsibility for its over-all management) for teaching and research purposes. A paper by the editor discusses the functions as well as the problems of an instructional for…	1980	91	3	53-70
18772		Ecological impact of acid precipitation. Proceedings of an international conference, Sandefjord, Norway, March 11-14, 1980	Book	More than 140 papers are presented including a conference summary (Last, F.T.; Likens, G.E.; Ulrich, B.; Walloee, L.), invited survey papers, synopses of poster and short oral presentations, and reports on special integrated studies. The synopses and reports are arranged in 5 subject groups (see next 4 abstracts). The invited papers include:Miller, H.G.; Miller, J.D. Collection and retention of a…	1980
18773		What role for biolubricants in the forest?	RenDez-Vous Techniques	This dossier of 7 articles presents results from research undertaken in France regarding the use of biolubricants in forestry. Several types of lubricants are considered: chain oils, hydraulic fluids, 2-stroke oils, engine oils and various greases. In mainland France, 10 million litres of lubricants are used every year for the chains of chainsaws and harvesting machines, with 85-97% of it ejected…	2005		7	19-45
18774		Growth and Defence in Plants: Resource Allocation at Multiple Scales	Book Section	This 482-page book in English titled "Growth and Defence in Plants-Resource Allocation at Multiple Scales" is volume 220 in the series "Ecological Studies". This book contains 20 individually-authored chapters. Each chapter is extensively referenced. Topics covered include balance between resource sequestration and retention, common links of molecular biology with biochemistry and physiology in p…	2012
18775		Role of Natural and Constructed Wetlands in Nutrient Cycling and Retention on the Landscape	Book	This 348-page book in English titled "The Role of Natural and Constructed Wetlands in Nutrient Cycling and Retention on the Landscape" is a volume in its series. This book contains 21 individually-authored chapters. Each chapter is extensively referenced. Specific chapter topics include: biomass production in permanent wet grassland, greenhouse gas flux from restored agricultural wetland and natu…	2015
18776	Aaltonen, Heidi, Linden, Aki, Heinonsalo, Jussi, Biasi, Christina and Pumpanen, Jukka	Effects of prolonged drought stress on Scots pine seedling carbon allocation	Tree Physiology	As the number of drought occurrences has been predicted to increase with increasing temperatures, it is believed that boreal forests will become particularly vulnerable to decreased growth and increased tree mortality caused by the hydraulic failure, carbon starvation and vulnerability to pests following these. Although drought-affected trees are known to have stunted growth, as well as increased…	2017	37	4	418-427
18777	Aarnio, T., Derome, J. and Martikainen, P. J.	AVAILABILITY AND MOBILITY OF NUTRIENTS IN ACID FOREST SOIL TREATED WITH FAST AND SLOW-RELEASE NUTRIENTS	Plant and Soil	The effects of slow and fast-release fertilizers (P, K, Mg) on the movement and availability of nutrients in acid forest soil were studied. Fast-release superphosphate, potassium chloride and magnesium sulphate and slow-release apatite (P) and biotite (K, Mg) were applied alone or together with urea or urea+limestone. The nutrient content in the organic horizon was determined one growing season a…	1995	168		523-531
18778	Abrahamsen, G. and Stuanes, A. O.	Retention and leaching of N in Norwegian coniferous forests	Book	Deposition of N on boreal coniferous forests in Norway has increased over the last 50 years. This is likely to increase primary productivity, but also to have more harmful long-term effects. The current situation in Norwegian forests is evaluated with regard to the possibility of N saturation, and critical N loads for forest systems are estimated. Discussions of N leaching, gaseous losses of N, a…	1997
18779	Abrahamsen, G. and Stuanes, A. O.	Retention and leaching of N in Norwegian coniferous forests	Nutrient Cycling in Agroecosystems	Nitrogen is brought into natural ecosystems from the atmosphere through N-fixation and deposition of NH4+ and NO3- as wet and dry deposition. N is lost from terrestrial ecosystems unaffected by human activities by leaching or as gas, but the losses from different forest- and vegetation types are poorly quantified. The leaching is hampered by uptake in the vegetation and by immobilisation by soil …	1998	52	2019-02-03	171-178
18780	Adamczyk, Bartosz, Adamczyk, Sylwia, Kukkola, Mikko, Tamminen, Pekka and Smolander, Aino	Logging residue harvest may decrease enzymatic activity of boreal forest soils	Soil Biology & Biochemistry	Nowadays conventional stem-only harvest where logging residues are left on the site is often displaced by whole-tree harvest, in which logging residues are harvested for use as bioenergy. Logging residues consist of tree branches and tops of stems with needles. The aim of this study was to evaluate the effect of logging residue harvest on soil enzyme activities involved in C, N and P cycling, nam…	2015	82		74-80
18781	Adamczyk, Bartosz, Kiikkila, Oili, Kitunen, Veikko and Smolander, Aino	Can we measure condensed tannins from tannin-protein complexes? - A case study with acid-butanol assay in boreal forest soil organic layer	European Journal of Soil Biology	Tannins may influence nitrogen cycle in forest soil. To understand the role of tannins in the decomposition process, we need to know their amount in the soil. Measurements of soil tannins meet great difficulties as tannins may undergo substantial retention. The main aim of this study was to assess the influence of complexation with proteins on condensed tannins (CT) retention. We measured the amo…	2014	64		40-45
18782	Adamczyk, S.	The role of terpenes in carbon and nitrogen cycling in boreal forest soils	Dissertationes Forestales	Cycling of carbon (C) and nutrients plays pivotal role for functioning of every ecosystem. Biogeochemical cycles of carbon and nitrogen (N) are balanced by a network of interactions between plants, litter and soil chemistry, microbial communities, enzyme machinery and climate conditions. This thesis focuses on the role of terpenes in C and N transformations in boreal forest soils. Terpenes are ab…	2016		228	40 pp.-40 pp.
18783	Adams, Mary Beth, Knoepp, Jennifer D. and Webster, Jackson R.	Inorganic Nitrogen Retention by Watersheds at Fernow Experimental Forest and Coweeta Hydrologic Laboratory	Soil Science Society of America Journal	Because elevated N loading can impair both terrestrial and aquatic ecosystems, understanding the abiotic and biotic controls over retention and export of dissolved inorganic N (DI N) is crucial. Long-term research has been conducted on experimental watersheds at two U.S. Forest Service experimental forests in the Appalachian region: Fernow Experimental Forest (FEF) in West Virginia and Coweeta Hy…	2014	78		S84-S94
18784	Adriaenssens, Sandy, Staelens, Jeroen, Wuyts, Karen, Samson, Roeland, Verheyen, Kris and Boeckx, Pascal	Retention of Dissolved Inorganic Nitrogen by Foliage and Twigs of Four Temperate Tree Species	Ecosystems	Nitrogen (N) retention by tree canopies is believed to be an important process for tree nutrient uptake, and its quantification is a key issue in determining the impact of atmospheric N deposition on forest ecosystems. Due to dry deposition and retention by other canopy elements, the actual uptake and assimilation by the tree canopy is often obscured in throughfall studies. In this study, N-15-la…	2012	15	7	1093-1107
18785	Adrizal, A., Patterson, P. H., Hulet, R. M., Bates, R. M., Myers, C. A. B., Martin, G. P., Shockey, R. L., Van der Grinten, M., Anderson, D. A. and Thompson, J. R.	Vegetative buffers for fan emissions from poultry farms: 2. ammonia, dust and foliar nitrogen	Journal of Environmental Science and Health Part B-Pesticides Food Contaminants and Agricultural Wastes	This study evaluated the potential of trees planted around commercial poultry farms to trap ammonia (NH3) and dust or particulate matter (PM). Norway spruce, Spike hybrid poplar, hybrid willow, and Streamco purpleosier willow were planted on five commercial farms from 2003 to 2004. Plant foliage was sampled in front of the exhaust fans and at a control distance away from the fans on one turkey, t…	2008	43	1	96-103
18786	Aho, V. and Sorakivi, P.	Investigations on creosote impregnation of Birch sleepers. III. Results of test impregnation	Tied. Valt. Tekin. Tutkimusl. (Sarja 1 - Puu)	cf. F.A. 31 No. 1517.] In studies at the State Railway impregnation plant at Mikkeli, Finland, schedules developed for Beech were unsuitable for Birch. For maximum penetration of Birch sleepers an initial heating of creosote and sleepers is necessary; the differential between initial and working pressures should be not less than 10 kg./sq. cm. Mean penetration was 86-88% and mean retention as hig…	1970		52	43-43
18787	Akerman, A.	The direction of crop cultivation after the war. Some points of view	Nordisk Jordbrugsforskning	It should be possible for the yields from Sweden's arable land and meadows to be substantially increased during the coming normal period. Rationalization and continued mechanization should simplify, and cheapen agricultural production with a resultant diminution in labour consumption. For the development of Swedish agriculture research and experimental work should be continued on its present scal…	1944		2	89-104
18788	Akselsson, Cecilia, Belyazid, Salim, Hellsten, Sofie, Klarqvist, Malin, Pihl-Karlsson, Gunilla, Karlsson, Per-Erik and Lundin, Lars	Assessing the risk of N leaching from forest soils across a steep N deposition gradient in Sweden	Environmental Pollution	Nitrogen leaching from boreal and temporal forests, where normally most of the nitrogen is retained, has the potential to increase acidification of soil and water and eutrophication of the Baltic Sea. In parts of Sweden, where the nitrogen deposition has been intermediate to high during recent decades, there are indications that the soils are close to nitrogen saturation. In this study, four diff…	2010	158	12	3588-3595
18789	Akselsson, Cecilia, Hultberg, Hans, Karlsson, Per Erik, Karlsson, Gunilla Pihl and Hellsten, Sofie	Acidification trends in south Swedish forest soils 1986-2008-Slow recovery and high sensitivity to sea-salt episodes	Science of the Total Environment	Soil water chemistry in forest soils over 20 years was studied at nine sites in southern Sweden. The aim was to investigate the recovery from acidification and the influence of strong sea salt episodes that occur in the region. All sites but one showed signs of recovery from acidification along with the reduced sulphur deposition, but the recovery progress was slow and the soil water was in most …	2013	444		271-287
18790	Akselsson, C. and Westling, O.	Regionalized nitrogen budgets in forest soils for different deposition and forestry scenarios in Sweden	Global Ecology and Biogeography	Aim The aim of this work was to estimate on a regional scale the effects of nitrogen (N) deposition and harvest intensity on N-budgets in forest soils as a basis for strategies of emission reduction and sustainable forest management methods. Location The calculations were applied to Sweden, a country with a managed forest area of 23 x 10(6) ha. Methods Mass balance calculations, including N-depos…	2005	14	1	85-95
18791	Akselsson, C., Westling, O. and Orlander, G.	Regional mapping of nitrogen leaching from clearcuts in southern Sweden	Forest Ecology and Management	Increased nitrogen leaching from forest soils is a potential environmental problem in areas with high nitrogen deposition. In Sweden nitrogen is strongly retained in the forests, and high nitrogen leaching is not common from growing forests. However, soil water measurements on clearcuts along a deposition gradient in Sweden showed a positive correlation between increased concentration of inorgani…	2004	202	2019-01-03	235-243
18792	Alam, Ashraful, Strandman, Harri, Kellomaki, Seppo and Kilpelainen, Antti	Estimating net climate impacts of timber production and utilization in fossil fuel intensive material and energy substitution	Canadian Journal of Forest Research	We utilized an ecosystem model and life cycle assessment tool for studying carbon flows between the ecosystem, technosystem, and atmosphere for scenarios utilizing forest biomass (biosystem) against fossil fuel intensive materials (fossil system). The net climate impacts were studied for a Norway spruce (Picea abies (L.) Karst.) stand over two consecutive rotation periods (2 x 80 years) in the bo…	2017	47	8	1010-1020
18793	Alavi, G.	The impact of soil moisture on stem growth of spruce forest during a 22-year period	Forest Ecology and Management	The relationship between tree growth and water availability for a Norway spruce stand has been studied during a 22-year period at a forest in southern Sweden. The results suggested that shortage of soil water has a strong effect on tree growth in an area of southern Sweden with generally high precipitation. Trees growing on sites with deeper groundwater levels showed a larger between-year variati…	2002	166	2019-01-03	17-33
18794	Aleinikovas, Mamus	Effect of the mean diameter increment on the pine wood mechanical-physical properties in Lithuania	Baltic Forestry	The paper presents the evaluation and comparison of some physical and mechanical properties of Scots pine (Pinus sylvestris L.) wood in stands with different growth type. The data have been collected on the basis of 9 sample plots. There were aspired that pine stands chosen for wood analysis could have as much familiar structure and identity character of stand growth as possible. Though, the requ…	2007	13	1	103-108
18795	Aleksandrov, A. Kh	Selection and evaluation of the most promising Bulgarian and foreign provenances of spruce (Picea abies)	Gorskostopanska Nauka	Details are given of a 14-yr provenance trial in Bulgaria with 20 selected provenances (3 from Romania, 2 from Czechoslovakia, 2 from Poland, 4 from Belorussia, 2 from W. Germany, 1 from Sweden, 1 from Denmark, and 5 from Bulgaria). Data are presented on height increment and other characteristics. The best provenances were Westerhof-98 (W. Germany), Minsk and Gomel (Belorussia) and Nodebo-327 (De…	1985	22	4	2019-03-10
18796	Allan, C. J.	Hydrochemical response of upland precambrian shield catchments to additions of H2SO4 and NH4NO3 during snowmelt	Canadian Journal of Fisheries and Aquatic Sciences	Two of three upland Precambrian Shield catchments received additions of H2SO4 and NH4NO3 prior to snowmelt in 1989 and 1990; loading levels were equivalent to 18 kg . ha(-1). yr(-1) as SO42- and 2.62 kg . ha(-1). yr(-1) as N. The third catchment served as a reference. The manipulated catchments retained 96-98% of the added NH4+(,) 73-94% of the added NO3-, 31-48% of the added SO42-, and 72-92% of…	1995	52	10	2213-2228
18797	Allan, C. J., Heyes, A., Roulet, N. T., St Louis, V. L. and Rudd, J. W. M.	Spatial and temporal dynamics of mercury in Precambrian Shield upland runoff	Biogeochemistry	Methylated and total Hg, and TOC concentrations were measured in precipitation and runoff in a first order Precambrian Shield watershed, and in precipitation, throughfall, shallow groundwater and runoff in a zero Precambrian Shield watershed. Plots dominated by open lichen-covered bedrock and another containing small patches of conifer forest and thin discontinuous surficial deposits were monitor…	2001	52	1	13-40
18798	Allan, C. J., Roulet, N. T. and Hill, A. R.	THE BIOGEOCHEMISTRY OF PRISTINE, HEADWATER PRECAMBRIAN SHIELD WATERSHEDS - AN ANALYSIS OF MATERIAL TRANSPORT WITHIN A HETEROGENEOUS LANDSCAPE	Biogeochemistry	The hydrology and elemental transport within five low order Precambrian shield catchments was investigated during 1988-90. Catchments were subdivided and instrumented to examine the vertical and horizontal fluxes of elements within and between two distinct landscape types: open, lichen-covered bedrock outcrops and patches of conifer forest. The dominant hydrologic pathways were Horton overland fl…	1993	22	1	37-79
18799	Amin, M. G. Mostofa, Simunek, Jirka and Laegdsmand, Mette	Simulation of the redistribution and fate of contaminants from soil-injected animal slurry	Agricultural Water Management	Spreading of contaminants from land-applied animal slurry may create hazard for both soil and water environments. Both the leaching and persistence of the contaminants is controlled by the redistribution of the contaminants immediately after application, while the redistribution is influenced by site conditions (here different slurry dry matter content and soil texture). HYDRUS-2D was used to sim…	2014	131		17-29
18800	An, J. L. and Huang, M. Y.	Long-term soil acidification model (LTSAM) development and application for analyzing soil responses to acidic deposition	Water Air and Soil Pollution	A long-term soil acidification model (LTSAM) which can describe calcareous and noncalcareous soil responses to acidic deposition is developed based on the conservation of alkalinity and Ulrich buffer ranges. The model which considers nine major ions of armospheric deposition, has focused on certain soil processes (weathering of carbonates, silicates, and aluminum (Al) oxides or hydroxides, cation…	1999	110	2019-03-04	255-272
18801	Anbalagan, Anbarasan, Schwede, Sebastian, Lindberg, Carl-Fredrik and Nehrenheim, Emma	Influence of hydraulic retention time on indigenous microalgae and activated sludge process	Water Research	Integration of the microalgae and activated sludge (MAAS) process in municipal wastewater treatment and biogas production from recovered MAAS was investigated by studying the hydraulic retention time (HRT) of semi-continuous photo-bioreactors. An average total nitrogen (TN) removal efficiency (RE) of maximum 81.5 +/- 5.1 and 64.6 +/- 16.2% was achieved at 6 and 4 days HRT. RE of total phosphorous…	2016	91		277-284
18802	Andersen, Hans Estrup, Blicher-Mathiesen, Gitte, Thodsen, Hans, Andersen, Peter Mejlhede, Larsen, Soren E., Stalnacke, Per, Humborg, Christoph, Morth, Carl-Magnus and Smedberg, Erik	Identifying Hot Spots of Agricultural Nitrogen Loss Within the Baltic Sea Drainage Basin	Water Air and Soil Pollution	Agricultural management practices are among the major drivers of agricultural nitrogen (N) loss. Legislation and management incentives for measures to mitigate N loss should eventually be carried out at the individual farm level. Consequently, an appropriate scale to simulate N loss from a scientific perspective should be at the farm scale. A data set of more than 4000 agricultural fields with co…	2016	227	1
18803	Andersen, M. K., Raulund-Rasmussen, K., Hansen, H. C. B. and Strobel, B. W.	Distribution and fractionation of heavy metals in pairs of arable and afforested soils in Denmark	European Journal of Soil Science	Afforestation of sandy arable soils in northern Europe is likely to lead to an increase in the soil's acidity and changes in the behaviour of the organic matter, and this might affect the ability of the soil to retain heavy metals. It is important to assess the impact of such a change in the land use on the solubility of the heavy metals and to assess the risk of leaching to surface- and groundwa…	2002	53	3	491-502
18804	Andersen, M. K., Refsgaard, A., Raulund-Rasmussen, K., Strobel, B. W. and Hansen, H. C. B.	Content, distribution, and solubility of cadmium in arable and forest soils	Soil Science Society of America Journal	Afforestation of former farmland decreases soil pH and thus increases the solubility of Cd in the soil, which may cause Cd leaching to streams and groundwater. The Cd concentration in soil and soil solution were determined in 11 pairs of Danish arable and forest soil profiles representing three different texture classes (sand, loamy sand, and sandy loam). The soil pH did not change or decrease wi…	2002	66	6	1829-1835
18805	Andersen, R.	HABITAT DETERIORATION AND THE MIGRATORY BEHAVIOR OF MOOSE (ALCES-ALCES L) IN NORWAY	Journal of Applied Ecology	(1) The population of moose (Alces alces) at Gausdal Vestfjell in central Norway migrate from low-lying summer areas to winter areas situated at higher altitudes. This is contrary to the general pattern of migration among herbivores. (2) Archaeological evidence along the migration route shows that the migratory behaviour of this population follows a traditional pattern that has been unchanged sin…	1991	28	1	102-108
18806	Andersson, Jon, Gomez, Eva Domingo, Michon, Sophie and Roberge, Jean-Michel	Tree cavity densities and characteristics in managed and unmanaged Swedish boreal forest	Scandinavian Journal of Forest Research	In forests worldwide, similar to 10-40% of bird and mammal species require cavities for nesting or roosting. Although knowledge of tree cavity availability and dynamics has increased during past decades, there is a striking lack of studies from boreal Europe. We studied the density and characteristics of cavities and cavity-bearing trees in three categories of forest in a north-Swedish landscape:…	2018	33	3	233-244
18807	Andersson, L. and Lepisto, A.	Links between runoff generation, climate and nitrate-N leaching from forested catchments	Water Air and Soil Pollution	To assess links between hydroclimatological factors and NO3--N concentrations in streamflow from boreal forests with shallow soils, data from two catchments were analyzed. TOPMODEL was used to calculate the surface runoff fraction, daily dynamics of soil moisture, groundwater levels, and extensions of saturated areas. The stable isotope O-18 was used for isotopic hydrograph separation (IHS) durin…	1998	105	2019-01-02	227-237
18808	Andersson, O.	Expertise and new business concepts will secure the Finnish forest industry's competitiveness	Paperi Ja Puu-Paper and Timber	Anne Brunila, the newly appointed President of the Finnish Forest Industries Federation, strongly believes that expertise and innovation are of key importance in responding to the challenges brought by globalization. It is vital that new research data be adapted faster to meet business needs, she argues (article on pages 76-77). "In the open global economy, Finnish companies have no option but to…	2006	88	2	76-+
18809	Andersson, P.	Nitrogen turnover in Swedish spruce forest ecosystems: effects of nitrogen deposition	Book Section	Nitrate leaching from growing forests is not yet a widespread problem in Sweden, but nitrogen (N) deposition and high N retention in the soil during recent decades might have changed forest ecosystems towards N saturation. In this thesis net N mineralization (measured with in situ incubations) was tested as an index of N status. It was shown that historic land use and N deposition, natural or sim…	2002
18810	Andersson, P., Berggren, D. and Johnsson, L.	30 years of N fertilisation in a forest ecosystem - The fate of added N and effects on N fluxes	Water Air and Soil Pollution	We investigated the fate of added N and its effect on N fluxes in a long-term nitrogen fertilisation experiment. Ammonium nitrate was added annually (30 years) at mean rates of 0 (NO), 35 (N1), 73 (N2) and 108 (N3) kg N ha(-1) yr(-1) to a spruce forest in Sweden, which initially showed signs of N deficiency. Net N mineralisation and N leaching were measured in situ together with soil N pools. We …	2001	130	2019-01-04	637-642
18811	Andersson, P., Berggren, D. and Nilsson, I.	Indices for nitrogen status and nitrate leaching from Norway spruce (Picea abies (L.) Karst.) stands in Sweden	Forest Ecology and Management	The aims of the study were to evaluate the influence of former N deposition and land-use on N status expressed as net N mineralisation and soil ON ratio, and to evaluate the relationship between N leaching and N status, N deposition or a combination of both. Net nitrogen (N) mineralisation and C/N ratio in the soil were measured at seven Swedish sites, all dominated by Norway spruce (Picea abies …	2002	157	2019-01-03	39-53
18812	Andersson, S., Nilsson, I. and Valeur, I.	Influence of dolomitic lime on DOC and DON leaching in a forest soil	Biogeochemistry	The influence of liming on leaching and distribution of dissolved organic carbon (DOC) and nitrogen (DON) in mineral soil was investigated in a leaching experiment with soil columns. Soil samples from separate horizons (O, A and B horizons) were collected from control and limed plots in a field liming experiment in a spruce forest in southern Sweden. The field liming (0.88 kg(-2)) had been carrie…	1999	47	3	297-317
18813	Andersson, T. and Hakanson, L.	TIME RESOLUTION OF MERCURY DOSE AND LAKE SENSITIVITY RELATED TO MERCURY CONTENT IN FISH	Water Air and Soil Pollution	This work treats data from 75 small, mainly oligotrophic Swedish forest lakes. The aim is to study and evaluate the temporal variation of different Hg-dose and lake sensitivity parameters vs. Hg in 1-kg pike and small perch (< 10 g). The lakes were treated with different remedies (such as lake liming) during 1987 in order to reduce Hg-levels in fish. Lake water chemistry has a large seasonal vari…	1991	56		169-186
18814	Andreasson, T.	Protection against damage by wild mammals: a report on experiments with a chemical product	Skogen	A new repellent, Wiltex, developed by Guilviks Fabrik AB, has been tested in S. Sweden. In tests with 2 + 2 Spruce sprayed after planting in Dec. 1953, in an area having large populations of rabbits, hares, and deer, 100% of untreated plants, 23% of those sprayed lightly on one side, 9% of those sprayed normally on one side and none of those sprayed on both sides, had been damaged by 3 May 1954. …	1956	43	1	2019-10-01
18815	Angelstam, P.	Forest biodiversity management - the Swedish model	Book		2003
18816	Angelstam, P. K., Anufriev, V. M., Balciauskas, L., Blagovidov, A. K., Borgegard, S. O., Hodge, S. J., Majewski, P., Ponomarenko, S. V., Shvarts, E. A., Tishkov, A. A., Tomialojc, L. and Wesolowski, T.	Biodiversity and sustainable forestry in European forests: How East and West can learn from each other	Wildlife Society Bulletin		1997	25	1	38-48
18817	Angers, Virginie Arielle, Drapeau, Pierre and Bergeron, Yves	Snag degradation pathways of four North American boreal tree species	Forest Ecology and Management	Many studies have highlighted the importance of deadwood, whether standing (snags) or fallen, in boreal ecosystems dynamics. However, a dearth of literature exists regarding the persistence and degradation pathways of these structures in northeastern American boreal species. Degradation pathways were examined in four tree species of the eastern boreal mixedwood and conifer forests of Canada: Trem…	2010	259	3	246-256
18818	Annand, P. K.	Report of the Chief of the Bureau of Entomology and Plant Quarantine. 19 40- 41	Report of the Chief of the Bureau of Entomology and Plant Quarantine. 19[40-]41.	An account is given of work on insect pests and their control in the United States during the year ending June 1941, some of which has already been noticed. Indications in laboratory tests in the previous year of the superiority of very finely divided phenothiazine [thiodiphenylamine] over the standard material used in most experimental work for the control of the codling moth [Cydia pomonella, L…	1942			120 pp.-120 pp.
18819	Arheimer, B. and Brandt, M.	Modelling nitrogen transport and retention in the catchments of southern Sweden	Ambio	The Baltic Sea is suffering from eutrophication and attempts are being made to reduce nutrient loads. This article focuses on nitrogen transport from southern Sweden (145 000 km(2)), and presents a model approach (HBV-N) that has been used in the national decision-making process for best management practices. Calculations of nitrogen leaching, retention in the freshwater system, net transport to …	1998	27	6	471-480
18820	Arheimer, B. and Brandt, M.	Watershed modelling of nonpoint nitrogen losses from arable land to the Swedish coast in 1985 and 1994	Ecological Engineering	Eutrophication problems in the Baltic Sea have drawn attention to the contribution of nutrients from surrounding countries. By using the HBV-N model in southern Sweden (145 000 km(2)) daily nitrogen leaching, reduction in rivers and lakes, net transport to the sea and source apportionment have been calculated in 3725 subbasins for the period 1985-1994, with calibration at 722 sites against measur…	2000	14	4	389-404
18821	Arheimer, Berit and Pers, B. Charlotta	Lessons learned? Effects of nutrient reductions from constructing wetlands in 1996-2006 across Sweden	Ecological Engineering	Water authorities are currently preparing the second river basin management plans to improve water status in Europe according to the Water Framework Directive (WFD). The on-going efforts of wetland constructions are related to historical efforts in draining land and lakes for agriculture. In Sweden, one of the major problems for surface water is eutrophication caused by diffuse pollution of nitro…	2017	103		404-414
18822	Armbruster, M., Seegert, J. and Feger, K. H.	Effects of changes in tree species composition on water flow dynamics - Model applications and their limitations	Plant and Soil	Water-plant relations play a key role in the water cycling in terrestrial ecosystems. Consequently, changes in tree species composition may have distinct effects on the water retention capacity as well as on the pattern of streamflow generation. Such changes may result from modified interception properties and transpiration related to differences in canopy properties and root distribution. In ord…	2004	264	2019-01-02	13-24
18823	Aronsson, A., Elowson, S. and Forsberg, N. G.	Drought damage to spruce Picea abies in southern Sweden	Sveriges Skogsvardsforbunds Tidskrift	'Sub-top dying' [see FA 39, 5335], frequently observed in the 1970s in Sweden, was studied in a mixed stand near lake Hjalmmaren, in relation to soil moisture content and potential, precipitation, water potential, individual growth and foliar nutrient content of sample trees. Precipitation had been below average for a number of years and drought stress was thought to be the chief cause of the dis…	1978	76	5	441-456
18824	Arseneault, Julie, Fenton, Nicole J. and Bergeron, Yves	Effects of variable canopy retention harvest on epixylic bryophytes in boreal black spruce - feathermoss forests	Canadian Journal of Forest Research-Revue Canadienne De Recherche Forestiere	Modification of forest attributes and structural components like downed wood (DW) during forest harvest can lead to local species loss. Epixylic bryophytes have been proposed as good indicators of such changes. Unharvested control, variable canopy retention, and single pass harvest represent a gradient in forest harvest impact and can be used to test the response of epixylic bryophytes to differe…	2012	42	8	1467-1476
18825	Asam, Zaki-ul-Zaman, Kaila, Annu, Nieminen, Mika, Sarkkola, Sakari, O'Driscoll, Connie, O'Connor, Mark, Sana, Afshan, Rodgers, Michael and Xiao, Liwen	Assessment of phosphorus retention efficiency of blanket peat buffer areas using a laboratory flume approach	Ecological Engineering	Large areas of upland blanket peat were afforested in the UK and Ireland before the importance of the riparian buffer areas was realized. These forests are now reaching harvestable age. In order to reduce the possible negative impact of harvesting activities on receiving water bodies, the creation of buffer areas along receiving water courses prior to the clear-felling of the main plantation has …	2012	49		160-169
18826	Asbakk, K.	Prolonged persistence of ivermectin in reindeer faeces on pasture	Rangifer Report	Samples of faeces were collected from reindeer calves that had been routinely treated with ivermectin, and from untreated control calves. The faeces were spread over designated 1m x 1m squares of forested land where reindeer had grazed for the previous 5 years or over squares in comparable areas that had been fenced for 6 years to prevent grazing. Samples of soil, vegetation and faeces were colle…	2007		12	95-99
18827	Asheim, L. J. and Mysterud, I.	The Norwegian sheep farming production system	Options Mediterraneennes. Serie A, Seminaires Mediterraneens	A description of the current farming system for sheep production in use in Norway is presented. The system is based on extensive use of natural open range pastures where 40-50 percentage of the total annual feed can be consumed. Lambs are born during late winter or spring, and sheep and lambs graze on fenced farmland before being released on open forested or alpine ranges. The animals are gathere…	1999		38	249-253
18828	Assis, Jorge, Lucas, Ana Vaz, Barbara, Ignacio and Serrao, Ester Alvares	Future climate change is predicted to shift long-term persistence zones in the cold-temperate kelp Laminaria hyperborea	Marine Environmental Research	Global climate change is shifting species distributions worldwide. At rear edges (warmer, low latitude range margins), the consequences of small variations in environmental conditions can be magnified, producing large negative effects on species ranges. A major outcome of shifts in distributions that only recently received attention is the potential to reduce the levels of intra-specific diversit…	2016	113		174-182
18829	Astel, Aleksander Maria and Malek, Stanislaw	Multiple modelling of water chemistry flows assessed in a mountain spruce catchment	European Journal of Forest Research	The study was carried out over a period of 1999-2003 in the DupniaA"ski Stream catchment located in Silesian Beskid Mts. Region (Southern Poland). Analysis of the chemical composition of bulk precipitation, throughfall, stemflow, surface flow, soil water (horizontal + vertical and vertical penetration) and outflow water samples was performed. The complex data matrix with more than 3,000 observati…	2010	129	3	463-473
18830	Astrom, M., Aaltonen, E. K. and Koivusaari, J.	Impact of forest ditching on nutrient loadings of a small stream - a paired catchment study in Kronoby, W Finland	Science of the Total Environment		2002	297	2019-01-03	127-140
18831	Astrom, Maria, Pettersson, Lars B., Ockinger, Erik and Hedin, Jonas	Habitat preferences and conservation of the marbled jewel beetle Poecilonota variolosa (Buprestidae)	Journal of Insect Conservation	Detailed knowledge on habitat requirements is a key to successful conservation actions. The marbled jewel beetle Poecilonota variolosa (Buprestidae) has a wide global distribution but populations are often scarce and typically fragmented. In Sweden it is monophagous on aspen Populus tremula and is classified as near threatened on the Swedish Red List due to its rapid population decline. This stud…	2013	17	6	1145-1154
18832	Atteia, O. and Dambrine, E.	TRACE-ELEMENT DYNAMICS IN THROUGHFALL OF 2 SPRUCE FORESTS OF FRENCH SWITZERLAND, WITH LOW POLLUTION LEVELS	Annales Des Sciences Forestieres	Trace element dynamics In throughfall of 2 spruce forests of French Switzerland, with low pollution levels. The chemical composition of rainfall and throughfall of 2 sites located in very different environments in Switzerland are compared. Calculation of the flux ratios from rainfall and throughfall leads to a differentiation between elements which are highly concentrated when passing though the …	1993	50	5	445-459
18833	Augustin, S., Bolte, A., Holzhausen, M. and Wolff, B.	Exceedance of critical loads of nitrogen and sulphur and its relation to forest conditions	European Journal of Forest Research	The calculation of critical loads and their exceedance is one method to describe the vulnerability of forests to environmental stress caused by anthropogenic impact. Exceedance of critical loads for acidifying inputs and nitrogen was compared to different indicators of the soil and forest conditions in the German part of the extensive forest monitoring (ICP Forests/EU Level I), including more tha…	2005	124	4	289-300
18834	Austara, O.	CONTROL OF IPS TYPOGRAPHUS - EXPERIMENTS WITH SYNTHETIC PHEROMONES AND INSECTICIDE SPRAYING OF STANDING TREES	Meddelelser Fra Norsk Institutt for Skogforskning		1978	34	5	129-152
18835	Austara, O. E.	Control of the large spruce bark beetle. Experiments with synthetic pheromones and insecticide spraying of standing trees	Meddelelser fra Norsk Institutt for Skogforskning	In investigations on Norway spruce [Picea abies] in a forest in south-eastern Norway, a pheromone mixture containing 77 mg methylbutenol, 137 mg cis-verbenol [(1 alpha ,2 beta ,5 alpha )-4,6,6-trimethylbicyclo[3.1.1]hept-3-en-2-ol] and 16 mg ipsdienol [2-methyl-6-methylene-2,7-octadien-4-ol] in Conrel dispensers was used to attract adults of Ips typographus (L.) to standing trees. Pheromone-baite…	1978	34	5	125-152
18836	Azniev, Yu N., Rikhter, I. E. and Sarnatskii, V. V.	The biological cycle of elements in spruce plantations	Lesnoi Zhurnal	Data are presented on the growth rates, biomass, and the consumption, retention, removal and return of C, N and ash elements in Norway spruce stands 12 and 27 yr old, with and without perennial lupin, in Belorussia. Thinning in the 27-yr plantation removed 63.4 kg N, 13.5 kg P, 29.7 kg K, 47.6 kg C and 7.3 kg Mg per ha from the stand without lupin, and 139.5, 29.2, 64.5, 109.4 and 15.3 kg/ha resp…	1983		4	30-33
18837	Bace, R. and Janda, P.	NATURAL REGENERATION OF NORWAY SPRUCE IN MOUNTAIN FORESTS: EFFECT OF LOG FEATURES ON SEEDLING ESTABLISHMENT	Book	We studied the spruce seedlings and saplings density (SSD) on logs in relation to: decay of logs, diameter, ground contact, origin, species of wood-decaying fungi, coverage by surrounding plants and maximum of spike penetration in the subalpine old-growth forests of Bohemian Forest and Ash Mts., Czech Republic. The SDD was on average 0.9, 5.5, 7.8 and 6.9 m-2 on decay stage 2, 3, 4 and 5 respecti…	2010
18838	Bace, Radek, Schurman, Jonathan S., Brabec, Marek, Cada, Vojtech, Despres, Tiphaine, Janda, Pavel, Labusova, Jana, Mikolas, Martin, Morrissey, Robert C., Mrhalova, Hana, Nagel, Thomas A., Novakova, Marketa H., Seedre, Meelis, Synek, Michal, Trotsiuk, Volodymyr and Svoboda, Miroslav	Long-term responses of canopy-understorey interactions to disturbance severity in primary Picea abies forests	Journal of Vegetation Science	Questions: How do canopy-understorey interactions respond to variation in disturbance severity over extended periods of time? For forests with different disturbance histories, do light availability and understorey cohort densities converge towards a common old-growth structure, or do historical legacies influence populations indefinitely? Locations: Remnants of primary spruce (Picea abies (L.) Ka…	2017	28	6	1128-1139
18839	Bace, Radek, Svoboda, Miroslav, Pouska, Vaclav, Janda, Pavel and Cervenka, Jaroslav	Natural regeneration in Central-European subalpine spruce forests: Which logs are suitable for seedling recruitment?	Forest Ecology and Management	Decaying logs form the major seedbed for trees in European subalpine Picea abies forests. However, many aspects related to seedling colonization pattern on logs remain unclear. The aim of this study was to analyze the relationships of P. abies (Norway spruce) seedling (height <15 cm) and sapling (height >= 15 cm) densities on decaying logs in relation to stage of wood decay, log diameter, ground …	2012	266		254-262
18840	Bagherzadeh, A., Brumme, R. and Beese, F.	Biomass and nutrients allocation in pot cultured beech seedlings: influence of nitrogen fertilizer	Journal of Forestry Research	Allocation of biomass and nutrient elements including Nitrogen to above and belowground compartments of beech seedlings (Fagus sylvatica L.) treated by labeled nitrogen fertilizer in the form of 15NH4 and 15NO3 were investigated at the end of two successive growing seasons. Pot cultured beech seedlings were grown at a green house on intact soil cores sampled from three adjacent stands including b…	2008	19	4	263-270
18841	Bagherzadeh, Ali, Brumme, Rainer and Beese, Friedrich	The fate of N-15-labeled nitrogen inputs to pot cultured beech seedlings	Journal of Forestry Research (Harbin)	The partitioning of nitrogen deposition among forest soil (including forest floor), leachate and above- and belowground biomass of pot cultured beech seedlings in comparison to non-cultured treatments were investigated by adding 1.92 g center dot m(-2) N-15 tracer in throughfall for two successive growing seasons at a greenhouse experiment. Ammonium and nitrate depositions were simulated on four …	2009	20	4	314-322
18842	Bahr, Adam, Ellstrom, Magnus, Akselsson, Cecilia, Ekblad, Alf, Mikusinska, Anna and Wallander, Hakan	Growth of ectomycorrhizal fungal mycelium along a Norway spruce forest nitrogen deposition gradient and its effect on nitrogen leakage	Soil Biology & Biochemistry	Almost all boreal and temperate forest tree species live in symbiosis with ectomycorrhizal fungi (EMF); the trees transfer carbon (C) to the fungi in exchange for nutrients and water. Several studies have shown that experimental application of inorganic nitrogen (N) represses production of EMF extramatrical mycelia (EMM), but studies along N deposition gradients are underrepresented. Other enviro…	2013	59		38-48
18843	Bahr, Adam, Ellstrom, Magnus, Bergh, Johan and Wallander, Hakan	Nitrogen leaching and ectomycorrhizal nitrogen retention capacity in a Norway spruce forest fertilized with nitrogen and phosphorus	Plant and Soil	To estimate the production of external ectomycorrhizal mycelia (EMM) in Norway spruce forests with varying nitrogen (N) and phosphorus (P) levels, and to relate this to the N retention capacity of ectomycorrhizal fungi (EMF) and N leaching. Seasonal changes in EMF production (in ingrowth mesh bags) and soil water N (in suction lysimeters) were analyzed after fertilization with N or N combined wit…	2015	390	2019-01-02	323-335
18844	Baker, Susan C., Halpern, Charles B., Wardlaw, Timothy J., Kern, Christel, Edgar, Graham J., Thomson, Russell J., Bigley, Richard E., Franklin, Jerry F., Gandhi, Kamal J. K., Gustafson, Lena, Johnson, Samuel, Palik, Brian J., Spies, Thomas A., Steel, E. Ashley, Weslien, Jan and Strengbom, Joachim	A cross-continental comparison of plant and beetle responses to retention of forest patches during timber harvest	Ecological Applications	Timber harvest can adversely affect forest biota. Recent research and application suggest that retention of mature forest elements (retention forestry), including unharvested patches (or aggregates) within larger harvested units, can benefit biodiversity compared to clearcutting. However, it is unclear whether these benefits can be generalized among the diverse taxa and biomes in which retention …	2016	26	8	2493-2504
18845	Baker, Susan C., Halpern, Charles B., Wardlaw, Timothy J., Kern, Christel, Edgar, Graham J., Thomson, Russell J., Bigley, Richard E., Franklin, Jerry F., Gandhi, Kamal J. K., Gustafsson, Lena, Johnson, Samuel, Palik, Brian J., Spies, Thomas A., Steel, Ashley E., Weslien, Jan and Strengbom, Joachim	Retention forestry_plants_beetles	Dryad		2016
18846	Baker, Susan C., Halpern, Charles B., Wardlaw, Timothy J., Kern, Christel, Edgar, Graham J., Thomson, Russell J., Bigley, Richard E., Franklin, Jerry F., Gandhi, Kamal J. K., Gustafsson, Lena, Johnson, Samuel, Palik, Brian J., Spies, Thomas A., Steel, Ashley E., Weslien, Jan and Strengbom, Joachim	Data from: A cross-continental comparison of plant and beetle responses to retention of forest patches during timber harvest	Dryad		2016
18847	Bakke, A.	Aggregation pheromone in the bark beetle Ips duplicatus (Sahlberg)	Norwegian Journal of Entomology	The first male Scolytids to attack standing trees or newly cut logs produce an aggregation pheromone that attracts other adults to the site [cf. RAE/A 57, 977; 60, 835; 61, 4562]. During studies in spruce forests in southern Norway mainly on Ips typographus (L.), an investigation was made on the pheromone produced by I. duplicatus (Sahlb.), of which populations increase, together with those of th…	1975	22	1	67-69
18848	Bakke, A.	HOST TREE AND BARK BEETLE INTERACTION DURING A MASS OUTBREAK OF IPS TYPOGRAPHUS IN NORWAY	Zeitschrift Fur Angewandte Entomologie-Journal of Applied Entomology		1983	96	2	118-125
18849	Bakken, L. R. and Bleken, M. A.	Temporal aspects of N-enrichment and emission of N2O to the atmosphere	Nutrient Cycling in Agroecosystems	Human activities result in N enrichment of the biosphere, primarily via the production of fertilizers and emission of NOx from combustion. This anthropogenic N enhance the ecosystems' primary production, hence the accumulation of organic N. As a result, affected ecosystems may take a long time to reach near-steady-state conditions, i.e. when inputs are balanced by losses through denitrification a…	1998	52	2019-02-03	107-121
18850	Bal Ram, Singh and Johnson, D. W.	Sulfate content and adsorption in soils of two forest watersheds in southern Norway	Water, Air, and Soil Pollution	Laboratory studies were conducted to determine the sulfate content and sulfate adsorption properties of soils from two watersheds in Southern Norway, which show no net sulfate retention in the field (input - output). Soils from both watersheds had generally high soluble sulfate contents, especially in surface horizons and in marsh soils. With one notable exception - an Fe podzol at Birkenes - ads…	1986	31	2019-03-04	847-856
18851	Baldwin, H. I.	Winter foliage colour of Scotch Pine	Proceedings 3rd Ntheast. For. Tree Improvemt. Conf., Ithaca 1955	A study was made of the winter foliage of 17-year Scots Pine of different provenances at Fox Forest, New Hampshire-a question of some commercial interest because of the use of this species for Christmas trees. (1) Foliage of trees raised from seed of extreme northern (Scandinavian) provenance turned bright yellow at the approach of winter; this is characteristic of sources away from the sea coast…	1956			2019-08-23
18852	Balezentiene, Ligita and Uzupis, Arnoldas	IMPACT OF SOLAR RADIATION AND PHYSICAL ENVIRONMENT PARAMETERS ON BIOGENIC MICRO GAS EMISSION	Book Section	In order to understanding a fluctuation of the biogenic micro gas emission, it is necessary to analyze a lot of physical parameters: temperature of atmosphere and soil, atmosphere gas concentration (O-2, CO2, ethylene etc.), soil solidity, dependency of the wind velocity on the height and density of plants, humidity of the soil, plant albedo variation response on the surface topography, vegetatio…	2010
18853	Banas, Jan, Bujoczek, Leszek, Zieba, Stanislaw and Drozd, Marek	The effects of different types of management, functions, and characteristics of stands in Polish forests on the amount of coarse woody debris	European Journal of Forest Research	In the modern forestry paradigm, many factors influence the amount of coarse woody debris (CWD). The present paper analyzes the effects of both local (national) programs (special functions of forests) and European programs (Natura 2000 sites), as well as the individual characteristics of forest stands. The study was conducted on 2,752 sampling plots distributed over an area of about 17,500 ha and…	2014	133	6	1095-1107
18854	Barbey, A.	English Title not available	Revue de Zoologie Agricole et Applique	Tortrix (Steganoptycha) pygmaeana, Hb., which has apparently been recorded on only two occasions (in 1895 in Denmark and in 1910 in Germany) as injurious in forests, has, during the last three summers, been present in great abundance in the Alps in Grisons (Switzerland), causing considerable damage to spruce [Picea] over an area of some 1, 500 acres. The moths are observed about mid-May, flying r…	1927	26	4	56-59
18855	Barring, U. and Torstensson, L.	Examples of the behaviour of hexazinone in forest soils after spot application	Weeds and weed control. 26th Swedish weed conference, Uppsala 30-31 January 1985. Vol. 1. Reports	In field trials near Uppsala and Mora in 1983, mobility of spot-applied hexazinone at a rate of 4 ml Velpar L (1 g a.i.)/spot in 4 different soil types was studied. Most of the herbicide was transported down to lower levels of the soil following movements of the soil water. Transport was slower in clay soil than in coarser soils. Soils with a high level of OM in the surface layer retained herbici…	1985			110-129
18856	Barsoum, N., Coote, L., Eycott, A. E., Fuller, L., Kiewitt, A. and Davies, R. G.	Diversity, functional structure and functional redundancy of woodland plant communities: How do mixed tree species plantations compare with monocultures?	Forest Ecology and Management	Managing forest plantation stands in a way that retains productivity targets, but that also fosters biodiversity and stand resilience are key sustainable forest management goals. Current forestry policy advocates a diversification of forest stands to achieve these goals, favouring mixed age structures and polycultures over single-aged monocultures. Evidence is lacking, however, to support this ma…	2016	382		244-256
18857	Barta, Jiri, Tahovska, Karolina, Santruckova, Hana and Oulehle, Filip	Microbial communities with distinct denitrification potential in spruce and beech soils differing in nitrate leaching	Scientific Reports	Nitrogen leaching owing to elevated acid deposition remains the main ecosystem threat worldwide. We aimed to contribute to the understanding of the highly variable nitrate losses observed in Europe after acid deposition retreat. Our study proceeded in adjacent beech and spruce forests undergoing acidification recovery and differing in nitrate leaching. We reconstructed soil microbial functional c…	2017	7
18858	Barthelemy, Helene, Stark, Sari, Michelsen, Anders and Olofsson, Johan	Urine is an important nitrogen source for plants irrespective of vegetation composition in an Arctic tundra: Insights from a N-15-enriched urea tracer experiment	Journal of Ecology	1. Mammalian herbivores can strongly influence nitrogen (N) cycling and herbivore urine could be a central component of the N cycle in grazed ecosystems. Despite its potential role for ecosystem productivity and functioning, the fate of N derived from urine has rarely been investigated in grazed ecosystems. 2. This study explored the fate of N-15-enriched urea in tundra sites that have been eithe…	2018	106	1	367-378
18859	Bartos, J., Spulak, O. and Cernohous, V.	Distribution of snow cover in relation to tree species planted in clearing due to salvage cutting in summmit mountain location	Zpravy Lesnickeho Vyzkumu	Climatic conditions on the large clear-cut areas which originated in the air pollution - ecological catastrophe during 1980s-1990s in the mountain areas of the Czech Republic - were completely changed compared to forest stands. Changes occurred in the accumulation and melting regime of snow as well. The question is how can young forest stands composed of different species influence snow depositio…	2009	54	3	166-173
18860	Bastviken, D., Sanden, P., Svensson, T., Stahlberg, C., Magounakis, M. and Oberg, G.	Chloride-retention and release in a boreal forest soil: Effects of soil water residence time and nitrogen and chloride loads	Environmental Science & Technology	The common assumption that chloride (Cl(-)) is conservative in soils and can be used as a groundwater tracer is currently being questioned, and an increasing number of studies indicate that Cl(-) can be retained in soils. We performed lysimeter experiments with soil from a coniferous forest in southeast Sweden to determine whether pore water residence time and nitrogen and Cl- loads affected Cl(-…	2006	40	9	2977-2982
18861	Bastviken, David, Svensson, Teresia, Karlsson, Susanne, Sanden, Per and Oberg, Gunilla	Temperature Sensitivity Indicates That Chlorination of Organic Matter in Forest Soil Is Primarily Biotic	Environmental Science & Technology	Old assumptions that chloride is inert and that most chlorinated organic matter in soils is anthropogenic have been challenged by findings of naturally formed organochlorines. Such natural chlorination has been recognized for several decades, but there are still very few measurements of chlorination rates or estimates of the quantitative importance of terrestrial chlorine transformations. While m…	2009	43	10	3569-3573
18862	Bastviken, David, Thomsen, Frida, Svensson, Teresia, Karlsson, Susanne, Sanden, Per, Shaw, George, Matucha, Miroslav and Oeberg, Gunilla	Chloride retention in forest soil by microbial uptake and by natural chlorination of organic matter	Geochimica Et Cosmochimica Acta	Inorganic chlorine (i.e. chloride; Cl(in)) is generally considered inert in soil and is often used as a tracer of soil and ground water movements. However, recent studies indicate that substantial retention or release of Cl(in) can occur in soil, but the rates and processes responsible under different environmental conditions are largely unknown. We performed (36)Cl tracer experiments which indic…	2007	71	13	3182-3192
18863	Battle, W. R.	THE EFFECT OF ADVANCE IN GENERATION AND AGE OF STAND ON BACTERIAL WILT REACTION OF ATLANTIC ALFALFA	Agronomy Journal		1952	44	12	602-605
18864	Beal, E., Webber, J. F. and Eaton, R. A.	Comparative susceptibility of pine, spruce and larch to sapstain	Forest Pathology	P>This study compared the susceptibility of five UK-grown conifer species to colonization by sapstain fungi in two trials carried out in consecutive years. The conifers consisted of Sitka spruce (Picea sitchensis), Japanese larch (Larix kaempferi), Norway spruce (Picea abies), Scots pine (Pinus sylvestris) and lodgepole pine (Pinus contorta). Freshly cut 1-m logs were exposed to the available ino…	2010	40	2	116-128
18865	Bejarano, Maria Dolores, Nilsson, Christer and Aguiar, Francisca Constanca	Riparian plant guilds become simpler and most likely fewer following flow regulation	Journal of Applied Ecology	1. River regulation affects riparian systems world-wide and conservation and restoration efforts are essential to retain biodiversity, and the functioning and services of riverine ecosystems. Effects of regulation on plant species richness have been widely addressed, but the filtering effect of regulation on guilds has received less attention. 2. We used a functional trait approach to identify ad…	2018	55	1	365-376
18866	Belanger, N., Pare, D., Bouchard, M. and Daoust, G.	Is the use of trees with superior growth a threat to soil nutrient availability? A case study with Norway spruce	Canadian Journal of Forest Research	The renewed interest in the use of fast-growing tree species is accompanied by concerns about the adverse effects that these trees may have on soil. Four Norway spruce (Picea abies (L.) Karst.) provenance trials in Quebec were used to test the hypothesis that a more vigorous growth would not occur at the expense of marginalizing available nutrient pools. On these sites, the provenance showing the…	2004	34	3	560-572
18867	Benzian, B., Bolton, J. and Coulter, J. K.	Fertiliser effects on the growth and composition of Sitka and Norway spruce nursery transplants and on the composition of a podzol profile after 15 year cropping	Research and Development Paper, Forestry Commission	In a heathland forest nursery on an acid podzol, fertilisers had large effects on soil pH. Sitka spruce (Picea sitchensis) was more tolerant to decreases in pH, Norway spruce (Picea abies) more tolerant to increases. The most effective nutrient for Sitka spruce was potassium followed by nitrogen, phosphorus and magnesium. Norway spruce responded to potassium, phosphorus and nitrogen - in that ord…	1974		109	14 pp.-14 pp.
18868	Benzian, B., Bolton, J. and Coulter, J. K.	Fertiliser effects on the growth and composition of Sitka and Norway Spruce nursery transplants and on the composition of a podzol profile after 15 years' cropping	Research and Development Paper, Forestry Commission, UK	Fertilizers had a large effect on soil pH in an acid podzol in a nursery at Wareham, Dorset. Picea sitchensis was more tolerant of decreases in pH, and P. abies more tolerant of increases. The most effective nutrient for increasing the growth of P. sitchensis was K followed by N, P and Mg. P. abies responded to K, P and N. The form in which N was applied (crushed hoof. (NH4)2SO4, 'Nitro-Chalk') d…	1974		109	i + 14 pp.-i + 14 pp.
18869	Berg, Bjorn, Erhagen, Bjorn, Johansson, Maj-Britt, Vesterdal, Lars, Faituri, Mikaeel, Sanborn, Paul and Nilsson, Mats	Manganese dynamics in decomposing needle and leaf litter - a synthesis	Canadian Journal of Forest Research-Revue Canadienne De Recherche Forestiere	The aim of the present synthesis paper was to determine whether concentration changes and net release of manganese (Mn), as related to accumulated litter mass loss, are related to initial Mn concentration, mean annual temperature (MAT), mean annual precipitation (MAP), and tree genus or species. We also examined whether limit values for decomposition are related to initial litter Mn concentration…	2013	43	12	1127-1136
18870	Berg, B. and Staaf, H.	Decomposition rate and chemical changes of Scots pine needle litter. I. Influence of stand age	Ecological Bulletins	Decomposition of Scots pine needle litter, its organic components, and release of the plant nutrients N, P, K, S, Ca and Mg were monitored in four pine stands on a podzolized sandy soil in Central Sweden over a period of three years. The differences in weight loss rate were generally small but significantly higher in the mature (120 years) stand than in stands aged 60 years and 20-25 years. Decom…	1980	32		363-372
18871	Bergan, J.	Effect of birch shelterwood on the establishment and growth of conifers planted in northern Norway	Rapport, Norsk Institutt for Skogforskning	Apart from small areas in E. Finnmark, Norway spruce does not occur naturally N. of the Arctic Circle in Norway. However, afforestation is being carried out here, usually involving the conversion of Betula pubescens forest to spruce plantations (80-90% Norway spruce). Between 1955 and 1963 eleven experimental plots were established in different vegetation types and under various climatic conditio…	1987		10/87	47 pp.-47 pp.
18872	Berger, T. W., Neubauer, C. and Glatzel, G.	Factors controlling soil carbon and nitrogen stores in pure stands of Norway spruce (Picea abies) and mixed species stands in Austria	Forest Ecology and Management	Soil data of 18 pairs of secondary pure spruce stands (Picea abies) and adjacent mixed stands of spruce and broadleaf trees (at least 40% broadleaf trees, mainly beech, Fagus sylvatica) on comparable sites were used to study effects of species composition and other driving forces on carbon and nitrogen stores. It was hypothesized that carbon input by litter and roots to different soil horizons ha…	2002	159	2019-01-02	2019-03-14
18873	Bergholm, J. and Majdi, H.	Accumulation of nutrients in above and below ground biomass in response to ammonium sulphate addition in a Norway spruce stand in southwest Sweden	Water Air and Soil Pollution	The effects of ammonium sulphate (NS) on the accumulation of nutrients in above and below ground biomass and soil were studied in a Norway spruce stand in south-west Sweden during 1988-1993. Ammonium sulphate addition resulted in nitrogen accumulation with 326 and 16 kg ha(-1) in above and below ground biomass, respectively. Corresponding figures for the control plots (C) were 34 and 3 kg ha(-1).…	2001	130	2019-01-04	1049-1054
18874	Bergkvist, B.	LEACHING OF METALS FROM A SPRUCE FOREST SOIL AS INFLUENCED BY EXPERIMENTAL ACIDIFICATION	Water Air and Soil Pollution		1986	31	2019-03-04	901-916
18875	Bergquist, J., Orlander, G. and Nilsson, U.	Deer browsing and slash removal affect field vegetation on south Swedish clearcuts	Forest Ecology and Management	The effects of deer browsing and slash removal on vegetation succession were studied on 20 clearcuts in southern Sweden. The experiment was established over a 5-year period (1989-1993). Each clearcut was divided into two parts: On one part 80% of the slash was removed, while on the other it was retained and evenly distributed. Field vegetation was studied on 0.5 m(2) plots on which the plant spec…	1999	115	2019-02-03	171-182
18876	Bergseng, Even, Ask, Jon Andreas, Framstad, Erik, Gobakken, Terje, Solberg, Birger and Hoen, Hans Fredrik	Biodiversity protection and economics in long term boreal forest management - A detailed case for the valuation of protection measures	Forest Policy and Economics	Increased protection of forest biodiversity implies reduced income from timber production both for society and forest owners, and consistent analysis of the relationships between biodiversity benefits and corresponding costs is important both for forest managers as well as policy makers. Using a complex dynamic forest optimization model, we analyse impacts on economy and biodiversity of forest ma…	2012	15		2019-12-21
18877	Bergseng, E. R.	Analyses of Norwegian forest policy: cost sharing, biodiversity and conflicts	Book	In this thesis I analyse effects of public intervention in the Norwegian forest sector, how it affects Norwegian non-industrial private forest owners and how they adapt their forest management behaviour as an effect of this. I have been especially concerned with effects of public cost sharing policies and environmental issues in forest management. Investment in reforestation is an important stand…	2008
18878	Bergstrom, Ann-Kristin, Bigler, Christian, Stensdotter, Ulrika and Lindstrom, Eva S.	Composition and dispersal of riverine and lake phytoplankton communities in connected systems with different water retention times	Freshwater Biology	1. Lake phytoplankton community structure may be influenced by both internal factors (predation, competition, resource constraints) and external ones, such as dispersal of materials and cells between connected habitats. However, little is known about the importance of cell dispersal for phytoplankton community structure in lakes. 2. We investigated the abundance and dispersal of phytoplankton cel…	2008	53	12	2520-2529
18879	Bergstrom, G., Wassgren, A. B., Anderbrant, O., Ochieng, S. A., Ostrand, F., Hansson, B. S., Hedenstrom, E. and Hogberg, H. E.	The sex pheromone of the pine sawfly Microdiprion pallipes (Hymenoptera : Diprionidae)	Naturwissenschaften		1998	85	5	244-248
18880	Berthelsen, B. O., Ardal, L., Steinnes, E., Abrahamsen, G. and Stuanes, A. O.	MOBILITY OF HEAVY-METALS IN PINE FOREST SOILS AS INFLUENCED BY EXPERIMENTAL ACIDIFICATION	Water Air and Soil Pollution	The mobility of Pb, Zn, Cd and Cu was examined at two adjacent experimental plots at Amli, southern Norway, B-1 and B-2. Both experiments were established on the same glacifluvial deposits, with forest consisting of uniform stands of Pinus sylvestris L. The forest in B-1 was planted between 1968 and 1970, while B-2 consisted of naturally regenerated trees. The experiments included plots supplied …	1994	73	2019-01-04	29-48
18881	Berthelsen, B. O. and Steinnes, E.	ACCUMULATION PATTERNS OF HEAVY-METALS IN SOIL PROFILES AS AFFECTED BY FOREST CLEAR-CUTTING	Geoderma	Vertical distribution of Zn, Pb, Cu and Cd was studied in podzol soil profiles of adjacent forested and clear-cut areas in a region contaminated with Zn, Pb and Cd from long-range atmospheric transport. This was in order to investigate possible effects of deforestation on accumulation and distribution patterns of these metals in surface soil profiles. Lower Zn and Cd contents were observed in the…	1995	66	2019-01-02	2019-01-14
18882	Berthold, M., Karstens, S., Buczko, U. and Schumann, R.	Potential export of soluble reactive phosphorus from a coastal wetland in a cold-temperate lagoon system: Buffer capacities of macrophytes and impact on phytoplankton	Science of the Total Environment	The main pathways for phosphorus flux from land to sea are particle-associated (erosion) and dissolved runoff (rivers, groundwater, and agricultural drainage systems). These pathways can act as diffused sources for aquatic systems and support primary production, therefore, counteracting the efforts aimed at reducing phosphorus input from point sources such as sewage treatment plants. Phosphorus s…	2018	616		46-54
18883	Beskaravajnaja, M. A.	Ecology of flowering and fructification of Acer negundo and its hybrids	Botanicheskii Zhurnal	Observations were made on some F2 plants from the cross A. negundo * A. platanoides At the age of five years they exceeded A. negundo in height by 37-98%. Six of the F1 hybrids bore hermaphrodite flowers and in their F2 progeny some individuals had all hermaphrodite flowers and some had mixed inflorescences composed of hermaphrodite and male flowers. The hermaphrodite flowers are regarded as tran…	1961	46		1171-77
18884	Bighiu, Maria Alexandra, Halden, Anna Norman, Goedkoop, Willem and Ottoson, Jakob	Assessing microbial contamination and antibiotic resistant bacteria using zebra mussels (Dreissena polymorpha)	Science of the Total Environment	Aquatic pollution with faecal bacteria and subsequent consumption of contaminated water or food is a worldwide issue that causes severe health effects (e.g. meningitis, salmonellosis, dysentery). In addition, the excessive use of antibiotics in animal husbandry and human medicine has enhanced the selective pressure on pathogenic bacteria, further increasing human health risks and detrimental effe…	2019	650		2141-2149
18885	Bindler, Richard, Renberg, Ingemar and Klaminder, Jonatan	Bridging the gap between ancient metal pollution and contemporary biogeochemistry	Journal of Paleolimnology	Paleolimnology provides long-term data that are often essential for understanding the current state of the environment. Even though there is great potential, paleolimnology is rarely used together with process-related studies to solve issues regarding cycling of elements in the environment. Clearly, this is a drawback because the cycling of many elements, which cause great concern in the present-…	2008	40	3	755-770
18886	Birch, Heidi, Mayer, Philipp, Lutzhoft, Hans-Christian Holten and Mikkelsen, Peter Steen	Partitioning of fluoranthene between free and bound forms in stormwater runoff and other urban discharges using passive dosing	Water Research	Partitioning of fluoranthene in stormwater runoff and other urban discharges was measured by a new analytical method based on passive dosing. Samples were collected at the inlet (n = 11) and outlet (n = 8) from a stormwater retention pond in Albertslund (Denmark), and for comparison samples were also obtained at a municipal wastewater treatment plant, a power plant, a contaminated site and a wast…	2012	46	18	6002-6012
18887	Bjarnason, H.	Conditions for tree growth in Iceland	Dansk Skovforeningens Tidsskrift	The climate of Iceland closely resembles that of certain parts of Alaska; hence it should be worth while to try at least some of the Alaskan conifers. In the author's opinion, Kofoed Hansen's statement on the impracticability of raising exotics is premature. The stock hitherto introduced has not been of correct provenance, being derived from regions with a higher mean summer temperature or a cont…	1940			2019-01-08
18888	Bjoringstad, H. P.	Reverse osmosis in the dairy industry - application and technical developments	Meieriposten	The non-cellulosic reverse osmosis (RO) membrane ZF99 (Paterson Candy International Ltd.) is used widely in Norway. It is superior to cellulose acetate membranes in permeability, retention, pH and temp. tolerance and can operate at pH 3 to 11 and up to 80°C. The PCI multistage recycle system is a commercial RO plant using tubular membranes with 3 stages, each with 6 parallel rows of 2 modules. It…	1986	75	19, Meieriteknikk 5	37-40
18889	Bjorkman, E.	Storage decay and bluestain of softwood and hardwood pulpwood stored in the forest	Kungliga Skogshogskolans Skrifter	Investigations were made in 1950-56 in different parts of Sweden on Pine, Spruce, Birch and Aspen pulpwood felled in winter, early summer, or late summer. Storage decay proved greater in areas with a more humid climate. The commonest decay fungi were Stereum sanguinolentum on softwoods, and Polyporus zonatus, S. hirsutum and S. purpureum on hardwoods. Corticium evolvens was abundant on both, but …	1948		29	128-128
18890	Bjorkman, E.	Plant condition and plant growth. Planting experiments with Spruce (Picea abies (L.) Karst.) on Calluna heathland	Studia forestal. suec. Skogshogsk.	Reports studies in Holland, S.W. Sweden - (a) with 2 + 0 and 3 + 0 plants raised on poor nursery soil with different fertilizer treatments; (b) with 2 + 2 plants of two size grades; and (c) on the effect of admixtures of other tree species-and discusses practical experience in heath afforestation in that county. Evaluation in 1965 of trees planted in 1949 and 1950 showed that P, and frequently al…	1970		88	36-36
18891	Blaschke, H.	BIOTIC ACTIVITIES AND LEACHING OF ORGANIC-COMPONENTS IN NEEDLE LITTER	Oikos		1981	37	2	210-215
18892	Blasko, Robert, Bach, Lisbet Holm, Yarwood, Stephanie A., Trumbore, Susan E., Hogberg, Peter and Hogberg, Mona N.	Shifts in soil microbial community structure, nitrogen cycling and the concomitant declining N availability in ageing primary boreal forest ecosystems	Soil Biology & Biochemistry	Plant growth in boreal forests is commonly limited by a low supply of nitrogen, a condition that may be aggravated by high tree below-ground allocation of carbon to ectomycorrhizal (ECM) fungi and associated microorganisms. These in turn immobilise N and reduce its availability to plants as boreal ecosystems develop. Here, we studied a boreal forest ecosystem chronosequence created by new land ri…	2015	91		200-211
18893	Boelt, B.	Look after the bumble bees on white and red clover	Froavleren	In Denmark, where it is normal practice to have 2 or 3 honey bee colonies per hectare for pollination in clover fields for seed crops, bumble bees are also of great importance for this process and should be encouraged. There are 29 bumble bee species in the country, of which 11 are long-tongued and can therefore utilize the long tetraploid flowers of red clover (although only the diploid varietie…	2012	95	4	2019-12-13
18894	Bokov, S. P., Kryukova, Z. M., Butko, Yu G., Pelevin, Yu A. and Sebeleva, G. V.	Changes in the chemical composition of wood during multi-stage monosulphite/sulphite cooking and of pulp during refining and bleaching	Khimiya Drevesiny	Norway Spruce pulping trials made with a process providing two-stage monosulphite/sulphite cooking followed by refining and bleaching showed that 86.7% of hemicelluloses, 99.75% of lignin, 93.1% of resins and fats and 11.8% of cellulose were dissolved, i.e. that the process has the advantage of achieving high lignin and hemicellulose solubility combined with relatively high cellulose retention. R…	1976		5	13-16
18895	Bollmark, M., Chen, H. J., Moritz, T. and Eliasson, L.	Relations between cytokinin level, bud development and apical control in Norway spruce, Picea abies	Physiologia Plantarum	In conifers such as Norway spruce, the extent of shoot growth is predetermined by the size and number of embryonal organs of the buds laid down the previous year. As it is known that cytokinins have a key role in bud development a possible hypothesis is that the level of cytokinin in the buds during their formation determines their size and complexity. As a first step to test this hypothesis we c…	1995	95	4	563-568
18896	Bollmark, M. and Eliasson, L.	A ROOTING INHIBITOR PRESENT IN NORWAY SPRUCE SEEDLINGS GROWN AT HIGH IRRADIANCE - A PUTATIVE CYTOKININ	Physiologia Plantarum	Cuttings from seedlings of Picea abies L. (Karst.) grown under high light (HL), rooted slowly and incompletely, whereas rooting in cuttings from seedlings grown under low light (LL) was rapid and almost complete. Immunoaffinity chromatography (IAC) with antibodies against isopentenyl adenosine ([9-R]iP) and trans-zeatin riboside ([9R]Z) was used to isolate cytokinin-like compounds from extracts o…	1990	80	4	527-533
18897	Bolte, A., Lambertz, B., Steinmeyer, A., Kallweit, R. and Meesenburg, H.	The role of the herbaceous vegetation in forest nutrient cycling - studies on permanent plots of the EU Level II program in North Germany	Forstarchiv	Herbaceous forest vegetation is included in the EU monitoring program Level II in Germany and Europe, which aims to study the role of herbaceous forest vegetation as a bio-indicator of site conditions and phytodiversity. Herbaceous plants contribute significantly to nutrient accumulation and turnover, but they are seldom included in the nutrient budgets of forest ecosystems. The aboveground bioma…	2004	75	6	207-220
18898	Bonifacio, Eleonora, Falsone, Gloria and Catoni, Marcella	Influence of serpentine abundance on the vertical distribution of available elements in soils	Plant and Soil	Background and Aim Biotic and abiotic factors contribute in shaping the distribution through the soil profile of elements released by mineral weathering; among them, leaching and biocycling dominate in temperate environments. We evaluated if the intensity of leaching and biocycling of nutrients can be modulated by element deficiencies linked to the abundance of serpentine in the soil parent mater…	2013	368	2019-01-02	493-506
18899	Borecki, T., Miscicki, S. and Nowakowska, J.	Problems of the evaluation of the health status of forests during periodic inventories	Sylwan	Data collected in 1987 on 10 100 trees from 2100 experimental plots in Rogow forest, Poland, were classified according to percentage loss of assimilation apparatus using a system described elsewhere. The sample was made up of 7028 Scots pine [Pinus sylvestris], 2405 oak [Quercus robur], 290 Norway spruce [Picea abies] and 377 silver fir [Abies alba]. Health status was shown to be poor compared wi…	1991	135	2019-04-06	27-35
18900	Borja, I.	Root dieback and defence responses in Norway spruce seedlings infected with the fungal pathogen, Pythium dimorphum	Book	The thesis is based on 4 papers (included as appendices) in a study of the process of root dieback at several levels. The pathogenesis of primary roots of Norway spruce (Picea abies), challenged with the pathogenic fungus Pythium dimorphum, was chosen as a model system for examining disease development in nurseries, infection process and cellular changes, and host defence mechanisms such as ligni…	1995
18901	Borjesson, G. and Nohrstedt, H. O.	Short- and long-term effects of nitrogen fertilization on methane oxidation in three Swedish forest soils	Biology and Fertility of Soils	Under normal conditions, CH4, one of the most important greenhouse gases, is subject to biologi cal oxidation in forest soils. However, this process can be negatively affected by N amendment. The reported experiment was conducted in order to study the short- and long-term effects of N amendment on CH4 oxidation in pine (Pinus sylvestris L.) forest soils. Soil samples were taken from three experim…	1998	27	2	113-118
18902	Bornebusch, C. H.	Heathland degeneration and the restoration on Danish Calluna heaths of humus conditions suitable for forest	Svenska Skogsvardsforeningens Tidskrift	Over large areas of Jutland the soil is a coarse-grained glacial sand, extremely poor in mineral nutrients and for the most part without any admixture of finer sand or clay. It is markedly podsolized and has formed a thick but rather soft pan at a depth of about 25 to 30 cm. Pollen analyses and finds of stumps suggest that Scots Pine was the original cover, but the present natural vegetation is h…	1939	37		316-26
18903	Bornebusch, C. H.	Experiments on planting Norway Spruce by different methods	Dansk Skovforeningens Tidsskrift	In Danish trials established in 1935 and 1936, 2/2 has proved generally superior to 2/0 planting stock, having a lower mortality and retaining its lead in growth. Spade-dug planting pits were best, followed in order by mattocked pits and T-notching with a spade. Some consideration is given to costs and it is concluded (a) that 2/0 stock is not to be recommended, being useless on the more difficul…	1941	26	3	97-107
18904	Bornebusch, C. H.	Storage of Norway and Sitka Spruce seed. Preliminary results of experiments	Dansk Skovforeningens Tidsskrift	A 10-year storage test was begun in winter 1941-42 with specially cleaned seed of the preceding autumn. The present article reports on germination tests in the springs of 1943 and 1944. (a) Seed stored in sealed glass containers (in a dark frost-free fruit cellar): If initially dried to 8 or 4 per cent. moisture, seed retained its viability unchanged for the 2-year period; seed with an initial mo…	1944	29	7	257-63
18905	Bornebusch, C. H.	Red Oak in Danish forestry	Forstlige Forsoksvaesen i Danmark	Red Oak (Quercus borealis) was introduced into Denmark in the 18th century, but was used only as a park tree until about 1880. Most of the forest stands were established during the present century, and the total area of Danish stands of this species is less than 200 ha. The mensurational data obtained show that the early height growth of the species is rapid and much exceeds that of Danish Pedunc…	1945	15		357-96
18906	Bornkamm, R., Faensen-Thiebes, A. and Nino, M.	Changes of macroscopic symptoms during the lifetime of pine needles (Pinus sylvestris L.)	Forstwissenschaftliches Centralblatt	In the present paper it was tested whether quantitative analysis (if macroscopic needle symptoms in Scots Pine (Pinus sylvestris L.) can be used for bioindication of increasing age and damage of needles. In the Grunewald Forest, Berlin, pine needles were investigated in situ for the presence of 6 symptoms from June 1992 until October 1995. Regarding the needle cohort 1991 sampling started at the …	2003	122	6	376-388
18907	Borset, O.	Hereditary characteristics of forest trees and forest management	Norsk Skogindustri	The importance of using good seed of suitable provenance and of grading plants and thinning and regenerating stands so as to retain the best genotypes is discussed. It is suggested that Norwegian woods may be improved through the use of spruces of German or other southern provenance, which show more vigourous growth than native races.	1954	8		97-102
18908	Bostedt, G., Lofgren, S. and Bishop, K.	Surface water liming versus soil liming: cost effectiveness analysis	Arbetsrapport - Institutionen for Skogsekonomi, Sveriges Lantbruksuniversitet	Acidification cause great damages, and dealing with the consequences, including countermeasures, are costly undertakings for society. It is therefore important that actions that are taken to counteract acidification are done in a cost-efficient manner. This relatively simple cost-efficiency analysis aims to compare the economic cost to society of surface water liming at different intensities over…	2007		362	15 pp.-15 pp.
18909	Boudreault, Catherine, Coxson, Darwyn S., Vincent, Elise, Bergeron, Yves and Marsh, Janet	Variation in epiphytic lichen and bryophyte composition and diversity along a gradient of productivity in Populus tremuloides stands of northeastern British Columbia, Canada	Ecoscience	The influence of site productivity on epiphyte diversity on aspen (Populus tremuloides) trunks was examined in 19 stands from northeastern British Columbia, whose site indices (dominant tree height at 50 y) ranged from 6.7 to 27.9 m. Canopy epiphyte communities responded strongly to gradients in site productivity. Correlations between plot scores along the axes of non-metric multidimensional scal…	2008	15	1	101-112
18910	Bouget, C., Larrieu, L., Nusillard, B. and Parmain, G.	In search of the best local habitat drivers for saproxylic beetle diversity in temperate deciduous forests	Biodiversity and Conservation	Deadwood-associated species are increasingly targeted in forest biodiversity conservation. In order to improve structural biodiversity indicators and sustainable management guidelines, we need to elucidate ecological and anthropogenic drivers of saproxylic diversity. Herein we aim to disentangle the effects of local habitat attributes which presumably drive saproxylic beetle communities in temper…	2013	22	9	2111-2130
18911	Bouget, Christophe, Nusillard, Benoit, Pineau, Xavier and Ricou, Charles	Effect of deadwood position on saproxylic beetles in temperate forests and conservation interest of oak snags	Insect Conservation and Diversity. 1. Intensive forestry has drastically reduced the volume of standing deadwood, even more than total deadwood volume. It has been demonstrated in boreal forests that snags have a high conservation value for many saproxylic species and that the lying or standing aspect of the deadwood makes a difference. The conservation of saproxylic beetles in the changing deadw…	2012	5	4	264-278
18912	Bradfer-Lawrence, Tom and McCann, Rory	Wanted Dead and Alive; coarse woody debris in the Caledonian pinewood	Scottish Forestry	In recent decades deadwood has come to be recognised as a vital component of the woodland ecosystem. To gauge the health of these habitats, conservation managers need to assess the type and volume of deadwood present on their ground. A comprehensive survey of the semi-natural pinewoods of Mar Lodge estate found a mean volume of 30.2 m(3) of deadwood per hectare. However there was a wide range of …	2012	66	1	2019-12-17
18913	Brazaitis, Gediminas and Kurlavicius, Petras	Green tree retention and bird communities on clearcuts in Lithuania	Baltic Forestry	We analyse the influence of green tree retention in bird communities on 1-15-year-old clearcuts. The highest number of bird species was found in cicarcuts with 0.1-1.0 of large (D>20 cm) residual green trees per hectare. Small (D<20 cm; H>8m) residual tree retention had no significant impact on the number of bird species. Neither small nor large trees influenced the density of breeding bird commu…	2003	9	2	63-70
18914	Brazaitis, Gediminas and Petelis, Kestutis	How birds are influenced by green tree retention in clear-cuts?	Acta Biologica Universitatis Daugavpiliensis	This study was made in southwestern Lithuania (54.4-55.1 o N; 23.2-24.2o E). We analyzed 164 clear-cut areas. (0.5-20.0 ha) covering a total area of 546 ha. The number of bird species in clear-cut differed significant between density groups of large residual trees (F=3.9; p<0.005) as well as all residual trees (F=2.92; p<0.05). The highest number of species was observed in clear-cuts with 0.1-1.0…	2003	3	2	79-89
18915	Bringmark, Lage, Lundin, Lars, Augustaitis, Algirdas, Beudert, Burkhard, Dieffenbach-Fries, Helga, Dirnboeck, Thomas, Grabner, Maria-Theresia, Hutchins, Mike, Kram, Pavel, Lyulko, Iraida, Ruoho-Airola, Tuija and Vana, Milan	Trace Metal Budgets for Forested Catchments in Europe-Pb, Cd, Hg, Cu and Zn	Water Air and Soil Pollution	Input/output budgets for cadmium (Cd), lead (Pb) and mercury (Hg) in the years 1997-2011 were monitored and determined for 14 small forest-covered catchments across Europe as part of the Integrated Monitoring program on the effects of long-range pollutants on ecosystems. Metal inputs were considered to derive from bulk deposition, throughfall and litterfall. Outputs were estimated from run-off va…	2013	224	4
18916	Broberg, O. and Persson, G.	EXTERNAL BUDGETS FOR PHOSPHORUS, NITROGEN AND DISSOLVED ORGANIC-CARBON FOR THE ACIDIFIED LAKE GARDSJON	Archiv Fur Hydrobiologie		1984	99	2	160-175
18917	Broese van Groenou, H.	Tests on Scots Pine transmission poles treated with waterborne salt preservatives	Holzzentralblatt	Poles from a Swedish test field forming part of an international test started in 1954 in Germany, France and Sweden [cf. F.A. 16 No. 2341] were subjected to chemical and mycological examination after 7 years. The salts used were (a) a Cr-F-As mixture, (b) a F-As salt containing dinitrophenol, (c) a Cr-Cu salt, and (d) a Cr-Zn-As salt. Poles treated with a more modern Cr-Cu-As formulation (e) 6 ye…	1970	96	149	2195-06-01
18918	Bruchwald, Arkadiusz, Dmyterko, Elzbieta and Brzeziecki, Bogdan	Dynamics and main direction of change in forest stands constituting the managed part of Bialowieza Forest	Sylwan	The paper describes current (in years 2007-2017) changes of basic parameters of forest stands that constitute the managed part of Bialowiea Forest (ca. 53,000 ha), divided into three forest districts: Bialowiea (12,600 ha), HajnOwka (19,700 ha) and Browsk (20,400 ha). The investigated tree stands represent different phases of ecological succession, modified by silvicultural treatments and other h…	2018	162	11	897-906
18919	Brumelis, G., Brown, D. H., Nikodemus, O. and Tjarve, D.	The monitoring and risk assessment of Zn deposition around a metal smelter in Latvia	Environmental Monitoring and Assessment	Heavy metal concentrations in Hylocomium splendens collected around a metal smelter in Latvia showed very high concentrations of Zn (> 200 mu g/g), and elevated concentrations of Pb (38.3 mu g/g) and Cu (18.3 mu g/g). In an attempt to better evaluate the potential toxicity of the high Zn concentrations, a serial elution method was used to determine the concentrations of zinc in intercellular, ext…	1999	58	2	201-212
18920	Brumelis, Guntis, Jonsson, Bengt Gunnar, Kouki, Jari, Kuuluvainen, Timo and Shorohova, Ekaterina	Forest Naturalness in Northern Europe: Perspectives on Processes, Structures and Species Diversity	Silva Fennica	Saving the remaining natural forests in northern Europe has been one of the main goals to halt the ongoing decline of forest biodiversity. To facilitate the recognition, mapping and efficient conservation of natural forests, there is an urgent need for a general formulation, based on ecological patterns and processes, of the concept of "forest naturalness". However, complexity, structural idiosyn…	2011	45	5	807-821
18921	Brundl, M., Schneebeli, M. and Fluhler, H.	Routing of canopy drip in the snowpack below a spruce crown	Hydrological Processes	Snow that is retained by a forest canopy may either sublimate or evaporate directly from the crown or drop as snow clumps or meltwater to the ground. Redistributed snow and meltwater affect the snow structure and prevent the formation of mechanically weak layers, which is the prerequisite for avalanche formation in forests. In this paper we describe the results of dye tracer experiments conducted…	1999	13	1	49-58
18922	Brunet, Jorg and Isacsson, Gunnar	Restoration of beech forest for saproxylic beetles-effects of habitat fragmentation and substrate density on species diversity and distribution	Biodiversity and Conservation	The influence of spatial location and density of beech snags on species diversity and distribution patterns of saproxylic beetles was studied in a 2,400 ha forest landscape in southern Sweden. Complete snag surveys were combined with a beetle survey using small window traps directly attached to the beech snags. The density of beech snags a parts per thousand yen30 cm dbh varied between one and se…	2009	18	9	2387-2404
18923	Buchmann, N., Schulze, E. D. and Gebauer, G.	N-15-AMMONIUM AND N-15-NITRATE UPTAKE OF A 15-YEAR-OLD PICEA-ABIES PLANTATION	Oecologia	Throughfall nitrogen of a 15-year-old Picea abies (L.) Karst. (Norway spruce) stand in the Fichtelgebirge, Germany, was labeled with either N-15- ammonium or N-15-nitrate and uptake of these two tracers was followed during two successive growing seasons (1991 and 1992). N-15-labeling (62 mg N-15 m(-2) under conditions of 1.5 g N m(-2) atmospheric nitrogen deposition) did not increase N concentrat…	1995	102	3	361-370
18924	Buddle, Christopher M. and Shorthouse, David P.	Effects of experimental harvesting on spider (Araneae) assemblages in boreal deciduous forests	Canadian Entomologist	Two large-scale forestry experiments, in Quebec (Sylviculture et amenagement forestiers ecosysystemique (SAFE)) and Alberta (Ecosystem Management by Emulating Natural Disturbance (E MEND)), were established in the late 1990s to test the effects of alternative silvicultural strategies (e.g., partial cutting) oil biodiversity in northern boreal forests. We collected spiders in pitfall traps 2 years…	2008	140	4	437-452
18925	Bunnell, Fred L., Spribille, Toby, Houde, Isabelle, Goward, Trevor and Bjoerk, Curtis	Lichens on down wood in logged and unlogged forest stands	Canadian Journal of Forest Research	Lichen communities of forests often appear to be negatively affected by timber harvest presumably because of reduction of suitable substrate and increased desiccation. We examined species richness and composition of lichens on wood of logs of the same decay class in unlogged stands (> 140 years old) and logged, 20- to 30-year-old stands. There was no significant difference in species richness or …	2008	38	5	1033-1041
18926	Buntgen, Ulf, Frank, David C., Kaczka, Ryszard J., Verstege, Anne, Zwijacz-Kozica, Tomasz and Esper, Jan	Growth responses to climate in a multi-species tree-ring network in the Western Carpathian Tatra Mountains, Poland and Slovakia	Tree Physiology	We analyzed growth responses to climate of 24 tree-ring width and four maximum latewood density chronologies from the greater Tatra region in Poland and Slovakia. This network comprises 1183 ring-width and 153 density measurement series from four conifer species (Picea abies (L.) Karst., Larix decidua Mill., Abies alba (L.) Karst., and Pinus mugo (L.)) between 800 and 1550 m a.s.l. Individual spl…	2007	27	5	689-702
18927	Buntgen, U., Frank, D. C., Schmidhalter, M., Neuwirth, B., Seifert, M. and Esper, J.	Growth/climate response shift in a long subalpine spruce chronology	Trees-Structure and Function	A new Norway spruce ( Picea abies ( L.) Karst.) tree-ring width chronology based on living and historic wood spanning the AD 1108-2003 period is developed. This composite record combines 208 high elevation samples from 3 Swiss subalpine valleys, i.e., Lotschental, Goms, and Engadine. To retain potential high- to low-frequency information in this dataset, individual spline detrending and the regio…	2006	20	1	99-110
18928	Buntgen, U., Kaszka, R., Esper, J., Frank, D. and Verstege, A.	Buntgen - BabiaGora - PCAB - ITRDB POLA022	NOAA Paleoclimatology	We analyzed growth responses to climate of 24 tree-ring width and four maximum latewood density chronologies from the greater Tatra region in Poland and Slovakia. This network comprises 1183 ring-width and 153 density measurement series from four conifer species (Picea abies (L.) Karst., Larix decidua Mill., Abies alba (L.) Karst., and Pinus mugo (L.)) between 800 and 1550 m a.s.l. Individual spl…	2007
18929	Buntgen, U., Kaszka, R., Esper, J., Frank, D. and Verstege, A.	Buntgen - DolinaPanszczycka - PCAB - ITRDB POLA025	NOAA Paleoclimatology	We analyzed growth responses to climate of 24 tree-ring width and four maximum latewood density chronologies from the greater Tatra region in Poland and Slovakia. This network comprises 1183 ring-width and 153 density measurement series from four conifer species (Picea abies (L.) Karst., Larix decidua Mill., Abies alba (L.) Karst., and Pinus mugo (L.)) between 800 and 1550 m a.s.l. Individual spl…	2010
18930	Buntgen, U., Kaszka, R., Esper, J., Frank, D. and Verstege, A.	Buntgen - DolinaSuchejwody - PCAB - ITRDB POLA027	NOAA Paleoclimatology	We analyzed growth responses to climate of 24 tree-ring width and four maximum latewood density chronologies from the greater Tatra region in Poland and Slovakia. This network comprises 1183 ring-width and 153 density measurement series from four conifer species (Picea abies (L.) Karst., Larix decidua Mill., Abies alba (L.) Karst., and Pinus mugo (L.)) between 800 and 1550 m a.s.l. Individual spl…	2010
18931	Buntgen, U., Kaszka, R., Esper, J., Frank, D. and Verstege, A.	Buntgen - Kosodrovina - PCAB - ITRDB SVK002	NOAA Paleoclimatology	We analyzed growth responses to climate of 24 tree-ring width and four maximum latewood density chronologies from the greater Tatra region in Poland and Slovakia. This network comprises 1183 ring-width and 153 density measurement series from four conifer species (Picea abies (L.) Karst., Larix decidua Mill., Abies alba (L.) Karst., and Pinus mugo (L.)) between 800 and 1550 m a.s.l. Individual spl…	2010
18932	Buntgen, U., Kaszka, R., Esper, J., Frank, D. and Verstege, A.	Buntgen - DolinaRygbiego - PCAB - ITRDB POLA026	NOAA Paleoclimatology	We analyzed growth responses to climate of 24 tree-ring width and four maximum latewood density chronologies from the greater Tatra region in Poland and Slovakia. This network comprises 1183 ring-width and 153 density measurement series from four conifer species (Picea abies (L.) Karst., Larix decidua Mill., Abies alba (L.) Karst., and Pinus mugo (L.)) between 800 and 1550 m a.s.l. Individual spl…	2010
18933	Buntgen, U., Kaszka, R., Esper, J., Frank, D. and Verstege, A.	Buntgen - DolinaWaksmunska - PCAB - ITRDB POLA028	NOAA Paleoclimatology	We analyzed growth responses to climate of 24 tree-ring width and four maximum latewood density chronologies from the greater Tatra region in Poland and Slovakia. This network comprises 1183 ring-width and 153 density measurement series from four conifer species (Picea abies (L.) Karst., Larix decidua Mill., Abies alba (L.) Karst., and Pinus mugo (L.)) between 800 and 1550 m a.s.l. Individual spl…	2010
18934	Buntgen, U., Kaszka, R., Esper, J., Frank, D. and Verstege, A.	Buntgen - Gorce - PCAB - ITRDB POLA029	NOAA Paleoclimatology	We analyzed growth responses to climate of 24 tree-ring width and four maximum latewood density chronologies from the greater Tatra region in Poland and Slovakia. This network comprises 1183 ring-width and 153 density measurement series from four conifer species (Picea abies (L.) Karst., Larix decidua Mill., Abies alba (L.) Karst., and Pinus mugo (L.)) between 800 and 1550 m a.s.l. Individual spl…	2010
18935	Bussinow, Milan, Sarapatka, Borivoj and Dlapa, Pavel	Chemical Degradation of Forest Soil as a Result of Polymetallic Ore Mining Activities	Polish Journal of Environmental Studies	The results of research conducted in the surroundings of a former polymetallic mine near the town of Zlate Hory, North Moravia, Czech Republic, are presented. A by-product of the ore flotation technique was 6.8 million tons of metalliferous tailings. The adjacent forest area is contaminated by wind-blown pyritic dust particles. The experimental profile was located in a spruce monoculture down win…	2012	21	6	1551-1561
18936	Calladine, John, du Feu, Chris and du Feu, Richard	Changing migration patterns of the Short-eared Owl Asio flammeus in Europe: an analysis of ringing recoveries	Journal of Ornithology	Analysis of ring recovery data for Short-eared Owls Asio flammeus spanning 96 years, 1912-2007, identified spatial and temporal differences in migration patterns. Birds with breeding areas or natal origins in the Boreal (principally Fenno-Scandinavia) and Continental (principally central Europe) regions tended to move the greatest distances. Although birds from the North Sea littoral and Britain …	2012	153	3	691-698
18937	Callesen, I., Ingerslev, M. and Raulund-Rasmussen, K.	Dissolution of granulated wood ash examined by in situ incubation: Effects of tree species and soil type	Biomass & Bioenergy	Wood ash recycling to forests may counteract nutrient losses caused by biomass harvest, since most nutrients except nitrogen are largely retained in the ash. Raw wood ash has an alkaline reaction with water and contains easily soluble as well as resistant compounds. Ash can be treated to ease handling and to avoid undesired effects on vegetation and leaching of nutrients. Forest ecosystems with d…	2007	31	10	693-699
18938	Campbell, Jocelyn, Fredeen, Arthur L. and Prescott, Cindy E.	Decomposition and nutrient release from four epiphytic lichen litters in sub-boreal spruce forests	Canadian Journal of Forest Research-Revue Canadienne De Recherche Forestiere	Epiphytic lichens are highly abundant in many sub-boreal forests and may be important components of nutrient cycling. Decomposition of, and nutrient release from, two cyanolichens (with N-2-fixing cyanobacterial partners) and two chlorolichens (with green-algal partners) were quantified to estimate N inputs from epiphytic lichen litter in late-seral forests. Initial decay rates were strongly corr…	2010	40	7	1473-1484
18939	Cape, J. N., Brown, A. H. F., Robertson, S. M. C., Howson, G. and Paterson, I. S.	INTERSPECIES COMPARISONS OF THROUGHFALL AND STEMFLOW AT 3 SITES IN NORTHERN BRITAIN	Forest Ecology and Management	Rainfall, throughfall and stemflow were collected every 2 weeks for 2 years at three forest sites in northern Britain. At each site, the distribution of water under pine (Pinus sylvestris L.) was compared with that under one or more other species, including Norway spruce (Picea abies (L.) Karst), Sitka spruce (Picea sitchensis (Bong.) Carr), larch (Larix decidua L.), oak (Quercus petraea Matt.) a…	1991	46	2019-03-04	165-177
18940	Caravaggi, Anthony, Leach, Katie, Santilli, Francesco, Rintala, Jukka, Helle, Pekka, Tiainen, Juha, Bisi, Francesco, Martinoli, Adriano, Montgomery, W. Ian and Reid, Neil	Niche overlap of mountain hare subspecies and the vulnerability of their ranges to invasion by the European hare; the (bad) luck of the Irish	Biological Invasions	Niche conservatism is the tendency of related species to retain ancestral tolerances after geographic separation. We used Ecological Niche Modelling and Principal Components Analysis of bioclimatic and habitat variables to describe the extent of the species niche, and degrees of bioclimatic-habitat niche conservatism within the mountain hare (L. timidus) clade. Mountain hare niche space was contr…	2017	19	2	655-674
18941	Carlander, A., Aronsson, P., Allestam, G., Stenstrom, T. A. and Perttu, K.	Transport and retention of bacteriophages in two types of willow-cropped lysimeters	Journal of Environmental Science and Health Part a-Toxic/Hazardous Substances & Environmental Engineering	Irrigation and fertilization of short-rotation willow coppice with wastewater is a new way of reusing wastewater in Sweden. To evaluate the possible impact of viruses on groundwater quality, the transport and retention of the bacteriophage Salmonella Typhimurium type 28B were studied in two types of willow-cropped field lysimeters containing clay or sand soil. Phages were applied to the soil surf…	2000	35	8	1477-1492
18942	Caruso, Alexandro, Rudolphi, Jorgen and Rydin, Hakan	Positive Edge Effects on Forest-Interior Cryptogams in Clear-Cuts	Plos One	Biological edge effects are often assessed in high quality focal habitats that are negatively influenced by human-modified low quality matrix habitats. A deeper understanding of the possibilities for positive edge effects in matrix habitats bordering focal habitats (e.g. spillover effects) is, however, essential for enhancing landscape-level resilience to human alterations. We surveyed epixylic (…	2011	6	11
18943	Castellano, Michael J. and Kaye, Jason P.	Global Within-Site Variance in Soil Solution Nitrogen and Hydraulic Conductivity Are Correlated with Clay Content	Ecosystems	Nutrient fluxes in terrestrial ecosystems are governed by complex biological and physical interactions. Ecologists' mechanistic understanding of these interactions has focused on biological controls including plant uptake and microbial processing. However, ecologists and hydrologists have recently demonstrated that physical controls are also important. Here, we show that within-site spatial varia…	2009	12	8	1343-1351
18944	Ceburnis, D. and Steinnes, E.	Conifer needles as biomonitors of atmospheric heavy metal deposition: comparison with mosses and precipitation, role of the canopy	Atmospheric Environment	Concentrations of seven elements (As, Cd, Cr, Mn, Pb, V, Zn) in mosses (Hylocomium spledens, Pleurozium schreberi, Eurhynchium angustirete) and needles of Norway spruce (Picea abies) and juniper (Juniperus communis) were determined at 48 sites in Lithuania. Conifer needles consistently showed many times lower concentrations than mosses collected at the same site. Correlations between heavy-metal …	2000	34	25	4265-4271
18945	Cermak, P. and Ondracek, V.	Findings from the application of coal combustion by-products (CCB) for forest reclamation on spoil banks of the North Bohemian Brown Coal Basin	Journal of Forest Science (Prague)	Coal combustion by-products (stabilizate, FDG gypsum) generated by the thermal power station in Ledvice were tested on an above-level dump of the Bilina Mine in the North Bohemian Brown Coal Basin during the reclamation of its surfacc for forestry purposes, A part of the experimental object was treated with coal combustion by products at a dose of 700-1,000 t/ha that were incorporated into the so…	2009	55	3	137-144
18946	Chastagner, G. A., Nielsen, U. B. and Riley, K. L.	Comparison of the postharvest quality of noble fir boughs from the United States and Danish provenances grown in Denmark	Hortscience	Postharvest moisture and needle retention of boughs was examined for four Danish and five U.S. provenances of noble fir grown in Denmark. Boughs were displayed indoors under controlled conditions, and data were collected relating to rates of moisture loss and needle retention. Small current-year shoots had moisture and needle loss patterns similar to larger bough material. Postharvest quality of …	2004	39	3	580-583
18947	Chen, Nengwang, Wu, Yinqi, Wu, Jiezhong, Yan, Xiuli and Hong, Huasheng	Natural and human influences on dissolved silica export from watershed to coast in Southeast China	Journal of Geophysical Research-Biogeosciences	Natural and human factors controlling dissolved silica (DSi) export from the watershed were investigated for the Jiulong River watershed in Southeast China, which is a subtropical region where tectonic activity and high runoff combine to create a global hot spot for DSi flux. Results showed that river DSi was fairly high (24676 mu mol L-1) due to granite lithology and increased human perturbation…	2014	119	1	95-109
18948	Chen, Y., Pettersen, T., Kvalbein, A. and Aamlid, T. S.	Playing quality, growth rate, thatch accumulation and tolerance to moss and annual bluegrass invasion as influenced by irrigation strategies on red fescue putting greens	Journal of Agronomy and Crop Science	Conversion from annual bluegrass or bentgrasses to red fescue could be an efficient way to minimise water use on golf greens. Our objective was to investigate the influences of four irrigation strategies on red fescue water use efficiency, turf quality, growth rate and resistance to annual bluegrass and moss invasion. The trial was carried out from August 2013 to August 2015 on a green establishe…	2018	204	2	185-195
18949	Chen, Yao-Te, Borken, Werner, Stange, Claus Florian and Matzner, Egbert	Effects of decreasing water potential on gross ammonification and nitrification in an acid coniferous forest soil	Soil Biology & Biochemistry	Changes in the soil water regime, predicted as a consequence of global climate change, might influence the N cycle in temperate forest soils. We investigated the effect of decreasing soil water potentials on gross ammonification and nitrification in different soil horizons of a Norway spruce forest and tested the hypotheses that i) gross rates are more sensitive to desiccation in the Oa and EA ho…	2011	43	2	333-338
18950	Cheng, Chihang, Xu, Letian, Xu, Dandan, Lou, Qiaozhe, Lu, Min and Sun, Jianghua	Does cryptic microbiota mitigate pine resistance to an invasive beetle-fungus complex? Implications for invasion potential	Scientific Reports	Microbial symbionts are known to assist exotic pests in their colonization of new host plants. However, there has been little evidence linking symbiotic invasion success to mechanisms for mitigation of native plant resistance. The red turpentine beetle (RTB) was introduced with a fungus, Leptographium procerum, to China from the United States and became a destructively invasive symbiotic complex …	2016	6
18951	Chernyshev, V. V., Nemchenkov, A. N., Kolashchikov, V. M. and Mashkin, I. M.	The new SLG-1 tree-planter	Lesnoe Khozyaistvo	An illustrated description, with specifications, is given of the design of the machine, developed in the USSR for planting seedlings on raised beds on wet sites. The tree-planter, rear-mounted on a forestry tractor and manned by 2 workers, plants seedlings at a spacing of 50, 75, 100 or 150 cm, retaining the shape of the raised bed. It works at a speed of 1.5-2.5 km/h. The quality of planting is …	1980		1	60-61
18952	Chiarugi, A.	Forest cytogenetics	Annali Accademia Italiana di Scienze Forestali	Discusses the application of cytogenetics to forest tree breeding. KEYWORDS: Botany general \ tree breeding \ plant breeding \ tree breeding \ plant breeding \ bibliography	1955	3		27-77
18953	Chlost, Izabela and Cieslinski, Roman	Effects of environmental and anthropogenic determinants on changes in groundwater levels in selected peat bogs of Slowinski National Park, northern Poland	Geologos	The present study focuses on two Baltic-type peat bogs in Slowinski National Park, namely that at Zarnowskie and at Kluki, located in the Lake Lebsko catchment and both characterised by a centrally located dome with a very marshy fringe area featuring an emerging marshy coniferous forest (Vaccinio uliginosi-Pinetum). The Zarnowskie bog is under active protection. A total of 24 flow barriers were …	2018	24	1	13-27
18954	Choma, Michal, Rappe-George, Martin O., Barta, Jiri, Capek, Petr, Kastovska, Eva, Gardenas, Annemieke I. and Santruckova, Hana	Recovery of the ectomycorrhizal community after termination of long-term nitrogen fertilisation of a boreal Norway spruce forest	Fungal Ecology	Ectomycorrhizal fungi (ECM) are a fundamental component of boreal forests promoting tree growth and participating in soil nutrient cycling. Increased nitrogen (N) input is known to largely influence ECM communities but their potential recovery is not well understood. Therefore, we studied the effects of long-term N-fertilisation on ECM communities, and their recovery after termination of N treatm…	2017	29		116-122
18955	Choudhary, Sonal, Blaud, Aimeric, Osborn, A. Mark, Press, Malcolm C. and Phoenix, Gareth K.	Nitrogen accumulation and partitioning in a High Arctic tundra ecosystem from extreme atmospheric N deposition events	Science of the Total Environment	Arctic ecosystems are threatened by pollution from recently detected extreme atmospheric nitrogen (N) deposition events in which up to 90% of the annual N deposition can occur in just a few days. We undertook the first assessment of the fate of N from extreme deposition in High Arctic tundra and are presenting the results from the whole ecosystem N-15 labelling experiment. In 2010, we simulated N…	2016	554		303-310
18956	Chrimes, D. and Nilson, K.	Overstorey density influence on the height of Picea abies regeneration in northern Sweden	Forestry	The study aimed specifically at investigating if canopy openness was a better predictor of the height growth of Norway spruce (Picea abies (L.) Karst.) advance regeneration than overstorey basal area or overstorey standing volume. In 1990, a field experiment with 3 x 2 factorial design and two replications (blocks) was established in an uneven-aged Norway spruce forest. Plots had a net plot area …	2005	78	4	433-442
18957	Christiansen, E. and Fjone, G.	PRUNING ENHANCES THE SUSCEPTIBILITY OF PICEA-ABIES TO INFECTION BY THE BARK BEETLE-TRANSMITTED BLUE-STAIN FUNGUS, OPHIOSTOMA-POLONICUM	Scandinavian Journal of Forest Research	Defoliation of conifers occasionally precedes bark beetle attacks, suggesting that a severe loss of foliage and ensuing reductions in carbohydrate availability may enhance host tree susceptibility. To shed light on this question, different degrees of defoliation on young Picea abies were simulated by removing whole whorls of branches from below, the trees retaining 100, 50, or 25% of their origin…	1993	8	2	235-245
18958	Ciuldiene, D., Aleinikoviene, J., Muraskiene, M., Marozas, V. and Armolaitis, K.	Release and retention patterns of organic compounds and nutrients after the cold period in foliar litterfall of pure European larch, common beech and red oak plantations in Lithuania	Eurasian Soil Science	This study was carried out in alien warmth-tolerant forest plantations of red oak (Quercus rubra), common beech (Fagus sylvatica) and European larch (Larix decidua). We compared the changes in foliar litterfall mass and biochemical composition after five months of cold period. The mean mass of fresh foliar litterfall collected in late autumn was 30% higher in red oak compared to the larch and bee…	2017	50	1	49-56
18959	Cizkova, Pavla, Hubeny, Pavel and Svoboda, Miroslav	RECENT DISTRIBUTION OF SPRUCE AND BEECH IN THE SUMAVA NATIONAL PARK IN THE NON-INTERVENTION AREA: CAN WE EXPECT THE CHANGE OF TREE SPECIES COMPOSITION?	Reports of Forestry Research-Zpravy Lesnickeho Vyzkumu	The appearance of future forests, but also the very existence of forests in non-intervention areas is dependent on the ability of trees to regenerate. The main objective of this work was to describe regeneration of spruce and beech according to the current species composition of the tree layer. Data collection took place in the framework of the long-term project entitled "The Biomonitoring of For…	2017	62	4	213-222
18960	Clapham, D., Demel, P., Elfstrand, M., Koop, H. U., Sabala, I. and Von Arnold, S.	Gene transfer by particle bombardment to embryogenic cultures of Picea abies and the production of transgenic plantlets	Scandinavian Journal of Forest Research	A particle inflow gun enabled efficient production of transgenic plantlets of Picea abies from embryogenic suspension cultures. In transient assays, the Zea ubiquitin promoter was 12-16 times as active as the 35S promoter. For stable transformation, the plasmid pAHC25 contained the bar gene and the gusA gene, both driven by the Zea ubiquitin promoter. Cells were maintained from 1 to 3 h before bo…	2000	15	2	151-160
18961	Clark, M. J., Gurnell, A. M., Milton, E. J., Seppala, M. and Kyostila, M.	Remotely-sensed vegetation classification as a snow depth indicator for hydrological analysis in sub-arctic Finland	Fennia	Study areas were designated at Kilpisjarvi and Kevo (high and low alt., respectively) in northern Finland. Landsat MSS data for Kilpisjarvi were processed through a series of interim classifications using simple density slicing of a band 7/5 ratio, incorporating ground radiometric data and vegetation identification progressively to refine the classification. The Kevo data were processed through a…	1985	163	2	195-216
18962	Clarke, N., Clegg, S., Guan, X. and Gobran, G. R.	Principal component analysis as a useful method in the study of soil chemical processes	Meddelelser fra Skogforsk	Using samples of forest soils (Haplorthod) from a Picea abies stand in Sweden, Principal Component Analysis (PCA) was applied to (i) leachates from a sequential leaching experiment using CaSO4 solutions, and (ii) extracts from soil fractions (bulk soil, rhizosphere and soil-root interface) from the three upper mineral horizons, in order to investigate patterns of covariance. For the leachates, th…	1996	47	14	30 pp.-30 pp.
18963	Clergeau, P.	THE EFFECT OF BIRDS ON SEED-GERMINATION OF FLESHY-FRUITED PLANTS IN TEMPERATE FARMLAND	Acta Oecologica-International Journal of Ecology	This work evaluates the effect of frugivorous birds, the starling Sturnus vulgaris L. and the blackbird Turdus merula L., on germination of fleshy fruit plants, Solanum nigrum L., Rubus fruticosus L., Sambucus nigra L. and Hedera helix L. These plants are very common in western France farmlands and are involved in the landscape change linked with abandonment of agriculture. Birds significantly en…	1992	13	6	679-686
18964	Collentine, D. and Futter, M. N.	Realising the potential of natural water retention measures in catchment flood management: trade-offs and matching interests	Journal of Flood Risk Management	Natural water retention measures (NWRM) are a multifunctional form of green infrastructure that can play an important role in catchment-scale flood risk management. While green infrastructure based on natural processes is increasingly recognised as being complementary to traditional flood control strategies based on grey infrastructure in urban areas, there are a number of outstanding challenges …	2018	11	1	76-84
18965	Conner, A. B.	52nd Annual Report of the Texas Agricultural Experiment Station	52nd Annual Report of the Texas Agricultural Experimental Station.	Plant Insecticides. Studies on the seasonal and annual variation in the rotenone and total extractive content in the roots of individual plants of Tephrosia virginiana were continued. No outstanding differences were noted during the growing season, but the rotenone and total extractive content is much increased in the second year. It has been found possible to obtain normal sets of seed on caged …	1939			304 pp.-304 pp.
18966	Courtois, H.	INFLUENCE OF DENSITY, MOISTURE CONTENT AND WIDTH OF ANNUAL RINGS ON DECOMPOSITION OF SOFTWOOD BY FOMES-ANNOSES (FR) CKE	Holz Als Roh-Und Werkstoff		1970	28	2	67-&
18967	Cruz-Paredes, Carla, Froslev, Tobias Guldberg, Michelsen, Anders, Bang-Andreasen, Toke, Hansen, Mette, Ingerslev, Morten, Skov, Simon, Wallander, Hakan and Kjoller, Rasmus	Wood ash application in a managed Norway spruce plantation did not affect ectomycorrhizal diversity or N retention capacity	Fungal Ecology	Ectomycorrhizal (ECM) fungi are key players in N cycling in coniferous forests, and forest management such as application of wood ash can affect their functionality. The aim of this study was to determine the effects of wood ash application on ECM fungal mycelial production, capacity to retain N, diversity and community composition. In-growth mesh bags were installed in control and treated plots.…	2019	39		2019-01-11
18968	Cugunovs, M.	Impacts of fire in active and passive restorations on boreal forest soils and vegetation	Dissertationes Forestales	Passive recovery or active restoration approaches may be used in the repair of degraded ecosystems. The effects of such measures on ecosystem patterns and processes, including boreal forest soils and vegetation, are poorly understood. This thesis examines the impacts of both active and passive restoration approaches on soil organic matter (SOM) and vegetation in the boreal forests of eastern Finl…	2018		259	35 pp.-35 pp.
18969	Curry, W. T. and Covington, S. A.	Grade stresses for European Redwood and Whitewood	Bull. For, Prod. Res., Lond.	cf. F.A. 30 No. 1536.] From extensive tests on a sample of Pinus sylvestris joists in Finland and subsequently in Britain, grade stress values (g.s.v.) appropriate to British conditions were determined for the Finnish stress grades T 130, T 100 and T 70. G.s.v. for the joists when graded under the British rules were also determined and compared with values obtained by the standard method based on…	1969		52	vi + 24 pp.-vi + 24 pp.
18970	Czyzyk, Krzysztof and Porter, Boleslaw	Impact of small mid-forest water reservoirs on trees radial increment	Sylwan	The aim of the study was to determine the effect of small forest water reservoirs on the radial increment of Scots pine and Norway spruce. We selected four small water reservoirs that were reconstructed in autumn 2006 in the Maskulinskie Forest District (northern Poland). Around each reservoir we placed transects according to the cardinal directions. At those transects we set up 10X10 m sample pl…	2018	162	7	539-546
18971	Dahlberg, A., Schimmel, J., Taylor, A. F. S. and Johannesson, H.	Post-fire legacy of ectomycorrhizal fungal communities in the Swedish boreal forest in relation to fire severity and logging intensity	Biological Conservation	Swedish foresters are placing increasing reliance in burning of forestland and green tree retention, in order to enhance biodiversity in the Swedish boreal forests. However, much remains to be learned about how to optimise nature conservation goals by different logging and burning procedures. We monitored the survival of ectomycorrhizal (EM) fungi as mycorrhizas, at a clear-cut, a seed tree stand…	2001	100	2	151-161
18972	Dahlstrom, N. and Nilsson, C.	The dynamics of coarse woody debris in boreal Swedish forests are similar between stream channels and adjacent riparian forests	Canadian Journal of Forest Research-Revue Canadienne De Recherche Forestiere	Although numerous studies have focused on the dynamics of coarse woody debris (CWD) in boreal Fennoscandian forests, information on CWD in streams remains limited. To achieve a better understanding of CWD dynamics in streams we compared amounts and characteristics of CWD between streams and adjacent riparian forests in old-growth and managed forest sites, respectively. We also identified distance…	2006	36	5	1139-1148
18973	Dalman, P.	THE EFFECT OF NEW CULTIVATION PRACTICES ON THE YIELD, CANE GROWTH AND HEALTH-STATUS OF RED RASPBERRY (RUBUS-IDAEUS L) IN FINLAND	Annales Agriculturae Fenniae	The primocane removal, biennial cropping, semi-biennial cropping and machine harvest of red raspberry cvs. Ottawa and Muskoka were investigated in six field experiments in 1980-1987. Competition between fruiting canes and vegetative canes was discussed on the basis of the results of field experiments. The experiments show that it is possible to achieve significant yield increases when vegetative …	1991	30	4	415-439
18974	Danley, Brian	Skepticism of state action in forest certification and voluntary set-asides: a Swedish example with two environmental offsetting options	Scandinavian Journal of Forest Research	Non-industrial private forest owners in Sweden are encouraged to mitigate environmental damages from forestry on their properties under a principle of freedom with responsibility, although the level of mitigation is generally left to the owners' discretion. One voluntary measure private forest owners are encouraged to take is setting aside a part of their productive forests for conservation. The …	2018	33	7	695-707
18975	Danley, Brian	Forest owner objectives typologies: Instruments for each owner type or instruments for most owner types?	Forest Policy and Economics	The extensive literature on non-industrial private forest owner typologies often assumes that different forest owner types will respond to different policy instruments according to shared forest ownership objectives. Forest owner typologies using principal component analysis and subsequent k-means clustering techniques are now prolific. The surprisingly little empirical work linking forest owner …	2019	105		72-82
18976	Dauknys, R. and Mazeikiene, A.	Research of parameters affecting sludge digestion process	Water and Environment Journal	The parameters characterizing and affecting anaerobic sludge digestion process in three Lithuanian cities are investigated. Results showed that digestion process was effective in all three objects: specific biogas production varied between 0.77 and 0.86 m(3)/kg volatile solids destroyed, methane content in the biogas varied between 64 and 67% and they complied with the values presented in the sci…	2018	32	2	179-185
18977	David, M. B. and Zech, W.	ADSORPTION OF DISSOLVED ORGANIC-CARBON AND SULFATE BY ACID FOREST SOILS IN THE FICHTELGEBIRGE, FRG	Zeitschrift Fur Pflanzenernahrung Und Bodenkunde	The adsorption of dissolved organic carbon (DOC) and sulfate was examined in mineral horizons of acid soils from damaged (Oberwarmensteinach) and healthy (Wulfersreuth) Norway spruce forested sites in the Fichtelgebirge (NE-Bavaria). The A horizons of both sites desorbed DOC at all levels added, whereas the B horizons (Bs and Bv) retained added DOC at levels > 5 mmol C kg-1. An initial mass isoth…	1990	153	6	379-384
18978	de Chantal, M., Eskola, L., Ilvesniemi, H., Leinonen, K. and Westman, C. J.	Early establishment of Pinus sylvestris and Picea abies sown on soil freshly prepared and after stabilisation	Silva Fennica	The aim of this study is to investigate the early establishment of Pinus sylvestris L. (Scots pine) and Picea abies (L.) Karst. (Norway spruce) seedlings on soil freshly prepared and soil left to stabilise for one year after preparation. Three site preparation treatments were studied: exposed C horizon, mound (broken O/E/B horizon piled upside down over undisturbed forest floor), and exposed E/B …	2003	37	1	15-30
18979	De Chantal, M., Kuuluvainen, T., Lindberg, H. and Vanha-Majamaa, I.	Early regeneration of Populus tremula from seed after forest restoration with fire	Scandinavian Journal of Forest Research	This study investigated the effects of biotope, substrate and coarse woody debris (CWD) shelter on Populus tremula L. regeneration from seed when restoring mature, managed, spruce-dominated stands on mesic sites. The stands were harvested using partial cuts, leaving 50 m(3) ha(-1) of standing retention trees and 30 m(3) ha(-1) of CWD, and burned. A direct seeding experiment was carried out 1 year…	2005	20		33-42
18980	de Chantal, M., Leinonen, K., Ilvesniemi, H. and Westman, C. J.	Combined effects of site preparation, soil properties, and sowing date on the establishment of Pinus sylvestris and Picea abies from seeds	Canadian Journal of Forest Research-Revue Canadienne De Recherche Forestiere	The aim of this study is to determine the effect of site preparation on soil properties and, in turn, the emergence, mortality, and establishment of Pinus sylvestris L. (Scots pine) and Picea abies (L.) Karst. (Norway spruce) seedlings sown in spring and summer along a slope with variation in soil texture and moisture. Three site preparation treatments of varying intensities were studied: exposed…	2003	33	5	931-945
18981	de Chantal, M., Leinonen, K., Ilvesniemi, H. and Westman, C. J.	Effects of site preparation on soil properties and on morphology of Pinus sylvestris and Picea abies seedlings sown at different dates	New Forests	The aims of the study are to find out the effects of site preparation on soil properties and on the morphology of three-year-old Pinus sylvestris L. and Picea abies ( L.) Karst. seedlings sown at different dates along a slope with variation in soil texture, water, and fertility. Based on the hypothesis that soil texture affects soil water content, water retention capacity, and nutrient content, w…	2004	27	2	159-173
18982	de Chantal, M., Lilja-Rothsten, S., Peterson, C., Kuuluvainen, T., Vanha-Majamaa, I. and Puttonen, P.	Tree regeneration before and after restoration treatments in managed boreal Picea abies stands	Applied Vegetation Science	Questions: What are the short-term effects of restoration treatments, including fire and/or partial cutting with dead wood creation, on seedling density and distribution among microsites, and do they differ between upland and paludified biotopes? Location: Mature managed Picea abies-dominated stands in southern Finland. Methods: The restoration treatments consisted of four levels of cutting, with…	2009	12	2	131-143
18983	de Groot, Maarten, Eler, Klemen, Flajsman, Katarina, Grebenc, Tine, Marinsek, Aleksander and Kutnar, Lado	Differential short-term response of functional groups to a change in forest management in a temperate forest	Forest Ecology and Management	Forests have high biodiversity, but are under threat worldwide. Sustainable forest management such as close-to-nature silviculture is needed. In this context forest management practices should be tested in regard to biodiversity. Therefore, we investigated the influence of gap formation and logging intensity on different functional groups in a close-to-nature managed fir-beech forest. Plots were …	2016	376		256-264
18984	de Wit, Heen A., Kainz, Martin J. and Lindholm, Markus	Methylmercury bioaccumulation in invertebrates of boreal streams in Norway: Effects of aqueous methylmercury and diet retention	Environmental Pollution	Transfer of aqueous methylmercury (MeHg) to primary consumers in aquatic foodwebs is poorly understood despite its importance for bioaccumulation of MeHg. We studied bioaccumulation of MeHg in simple aquatic food chains of two humic boreal streams in relation to streamwater chemistry, food web characteristics and dietary fatty acid (FA) biomarkers. Transfer of aqueous MeHg into primary consumers …	2012	164		235-241
18985	Dearden, Fiona M., Dehlin, Helena, Wardle, David A. and Nilsson, Marie-Charlotte	Changes in the ratio of twig to foliage in litterfall with species composition, and consequences for decomposition across a long term chronosequence	Oikos	In the past two centuries, anthropogenic fire suppression has affected many biomes, including boreal forests. Absence of fire in the boreal zone is often linked to declining soil fertility and increased carbon sequestration in the humus through changes in NPP and litter decomposition. We studied tree litterfall and litter decomposition for thirty lake islands in the boreal forested zone of Sweden…	2006	115	3	453-462
18986	del Rio, Miren and Sterba, Hubert	Comparing volume growth in pure and mixed stands of Pinus sylvestris and Quercus pyrenaica	Annals of Forest Science	In Mediterranean forestry, it is important to improve knowledge about mixed stands dynamics, including their productivity. Previous studies have focused on the interactions between different species (competition, reduction of competition and facilitation) depending on site, species composition and structure. At the centre of this research arc the possible differences between pure and mixed stands…	2009	66	5
18987	Deljanin, Isidora, Antanasijevic, Davor, Bjelajac, Andelika, Urosevic, Mira Anicic, Nikolic, Miroslav, Peric-Grujic, Aleksandra and Ristic, Mirjana	Chemometrics in biomonitoring: Distribution and correlation of trace elements in tree leaves	Science of the Total Environment	The concentrations of 15 elements were measured in the leaf samples of Aesculus hippocastanum, Tilia spp., Betula pendula and Acer platanoides collected in May and September of 2014 from four different locations in Belgrade, Serbia. The objective was to assess the chemical characterization of leaf surface and in-wax fractions, as well as the leaf tissue element content, by analyzing untreated, wa…	2016	545		361-371
18988	Deljanin, Isidora V., Tomasevic, Milica N., Urosevic, Mira P. Anicic, Antanasijevic, Davor Z., Peric-Grujic, Aleksandra A. and Ristic, Mirjana D.	Lead isotopic composition in tree leaves as tracers of lead in an urban environment	Ecological Indicators	Biomonitoring has been frequently used as a tool for assessing anthropogenic influences on the environment, and trees have been recognized as efficient ecological indicators of urban air quality. Variations of stable lead isotopic ratios have been suggested as a suitable method for the Pb source identification. Substantial methodological points are yet to be resolved regarding isotopic signatures…	2014	45		640-647
18989	den Herder, Michael, Kouki, Jari and Ruusila, Vesa	The effects of timber harvest, forest fire, and herbivores on regeneration of deciduous trees in boreal pine-dominated forests	Canadian Journal of Forest Research	Forest management fire and herbivores are the major factors affecting regeneration of deciduous trees in boreal forests. In a large-scale experiment we manipulated the use of prescribed burning the level of green-tree retention and the presence of moose (Alces alces L.) and hare (Lepus timidus L. and Lepus europaeus Pallas) to study their effects on early regeneration of three native pioneer tree…	2009	39	4	712-722
18990	Dering, Monika, Kosinski, Piotr, Wyka, Tomasz P., Pers-Kamczyc, Emilia, Boratynski, Adam, Boratynska, Krystyna, Reich, Peter B., Romo, Angel, Zadworny, Marcin, Zytkowiak, Roma and Oleksyn, Jacek	Tertiary remnants and Holocene colonizers: Genetic structure and phylogeography of Scots pine reveal higher genetic diversity in young boreal than in relict Mediterranean populations and a dual colonization of Fennoscandia	Diversity and Distributions	AimScots pine is one of the dominant tree species in forest ecosystems of the temperate and boreal zones in Eurasia. Since the Tertiary, it has persisted also in the Mediterranean region, forming relict populations. In this study, we investigate range-wide genetic diversity of Scots pine, aiming to provide comprehensive information on the phylogeography and genetic resources of the species. Locat…	2017	23	5	540-555
18991	Derome, J. and Nieminen, T.	Metal and macronutrient fluxes in heavy-metal polluted Scots pine ecosystems in SW Finland	Environmental Pollution	Cu, Ni, Zn, SO4-S and macronutrient fluxes in Scots pine ecosystems were investigated during 1992-1996 at distances of 0.5, 4 and 8 km from the Harjavalta Cu-Ni smelter, SW Finland. The flux of water percolating down to a soil depth of 5 cm at 0.5 km was more than double that at 4 and 8 km. There was a net loss of Zn from the 40-cm thick soil layer, but a net gain for Cu, Ni and SO4-S. Copper was…	1998	103	2019-02-03	219-228
18992	Derome, J. and Nieminen, T.	Metal and macronutrient fluxes in heavy-metal polluted Scots pine ecosystems in SW Finland	Environmental Pollution	Cu, Ni, Zn, SO4-S and macronutrient fluxes in Scots pine ecosystems were investigated during 1992-1996 at distances of 0.5, 4 and 8 km from the Harjavalta Cu-Ni smelter, SW Finland. The flux of water percolating down to a soil depth of 5 cm at 0.5 km was more than double that at 4 and 8 km. There was a net loss of Zn from the 40-cm thick soil layer, but a net gain for Cu, Ni and SO4-S. Copper was…	1999	103	2019-02-03	219-228
18993	Dettki, H., Klintberg, P. and Esseen, P. A.	Are epiphytic lichens in young forests limited by local dispersal?	Ecoscience	We investigated whether dispersal limitation is an important factor for the low abundance of epiphytic lichens in young boreal forests. The number of lichen thalli on branch sections of Pinus sylvestris was counted in five second-growth stands (35-78 years old) at increasing distances (10 m, 50 m, and 100 m) from adjacent old-growth stands (122-298 years old) presumed to function as propagule sou…	2000	7	3	317-325
18994	Diamandis, S.	TOP-DYING OF NORWAY SPRUCE, PICEA-ABIES (L) KARST WITH SPECIAL REFERENCE TO RHIZOSPHAERA-KALKHOFFII BUBAK .3. MOISTURE-CONTENT OF CURRENT AND 2ND YEAR NEEDLES OF NORWAY SPRUCE	European Journal of Forest Pathology		1978	8	2019-05-06	357-361
18995	Dighton, J., Helmisaari, H. S., Maghirang, M., Smith, S., Malcolm, K., Johnson, W., Quast, L., Lallier, B., Gray, D., Setala, H., Starr, M., Luiro, J. and Kukkola, M.	Impacts of forest post thinning residues on soil chemistry, fauna and roots: Implications of residue removal in Finland	Applied Soil Ecology	There is increasing interest in removing greater amounts of non-timber residues from forests for use in energy production. As part of a study aimed at elucidating the ecological impacts of these practices in Finland, piles of thinning residues of contrasting mass per unit area were established in 2004 around the base of individual Scots pine trees. As part of an NSF funded undergraduate training …	2012	60		16-22
18996	Dijkstra, Janet P. Mol, Reinds, Gert Jan, Kros, Hans, Berg, Bjorn and de Vries, Wim	Modelling soil carbon sequestration of intensively monitored forest plots in Europe by three different approaches	Forest Ecology and Management	Information on soil carbon sequestration and its interaction with nitrogen availability is rather limited, since soil processes account for the most significant unknowns in the C and N cycles. In this paper we compare three completely different approaches to calculate carbon sequestration in forest soils. The first approach is the limit-value concept, in which the soil carbon accumulation is esti…	2009	258	8	1780-1793
18997	Dimitriou, I. and Aronsson, P.	Wastewater and sewage sludge application to willows and poplars grown in lysimeters-Plant response and treatment efficiency	Biomass & Bioenergy	Adding nutrient-rich residues such as municipal wastewater and sludge to willow and poplar short-rotation coppice gives more cost-effective and sustainable cultivation, but leaching to groundwater and disturbance to plant growth must be avoided. The effects of adding municipal wastewater irrigation to willows and poplars and sewage sludge to willows were compared in a two-year experiment. Wastewa…	2011	35	1	161-170
18998	Dinkelaker, H. and Hausser, K.	Height, volume, and value performance of Douglas Fir, Japanese Larch, and Norway Spruce on comparable sites	Allg. Forst- u. Jagdztg.	In a study in S. Wurttemberg, height superiority of the exotics over Spruce declined with age and was greater on poorer sites. Larch lost its volume superiority at 65-70, and its value superiority ca. 10 years earlier. Douglas Fir retained its lead in all respects beyond age 80. The relation of volume and value production was independent of site for all three species. KEYWORDS: Exotics vs. indige…	1967	138	2019-02-03	25-43
18999	Dirnboeck, T., Foldal, C., Djukic, I., Kobler, J., Haas, E., Kiese, R. and Kitzler, B.	Historic nitrogen deposition determines future climate change effects on nitrogen retention in temperate forests	Climatic Change	Nitrogen (N) cycle processes in terrestrial ecosystems are highly sensitive to temperature and soil moisture variations. Thus, future climate change may affect the degree to which N deposited from the atmosphere will be retained in forest ecosystems. We evaluated the effect of future changes in climate and N deposition on ecosystem N cycling using the model LandscapeDNDC forced with historical da…	2017	144	2	221-235
19000	Djupstrom, Line B., Weslien, Jan and Schroeder, L. Martin	Dead wood and saproxylic beetles in set-aside and non set-aside forests in a boreal region	Forest Ecology and Management	The availability of habitat for wood-dependent species has been greatly reduced in Fennoscandian boreal forests and hence the setting aside of forest land for conservation purposes is a common strategy. Here, we explore the biodiversity quality and conservation relevance of three categories of set-asides dominated by Norway spruce (nature reserves, woodland key habitats and retention patches, i.e…	2008	255	2019-08-09	3340-3350
19001	Djupstrom, Line B., Weslien, Jan, ten Hoopen, Jan and Schroeder, Leif Martin	Restoration of habitats for a threatened saproxylic beetle species in a boreal landscape by retaining dead wood on clear-cuts	Biological Conservation	Forest restoration measures, such as dead wood retention and creation at the time of final felling, increase the amount of dead trees and should benefit a large proportion of species dependent on sun-exposed dead wood. In this study, the value of retained dead wood and high-cut stumps was evaluated in terms of how much they contribute to the population of the red-listed beetle Peltis grossa in a …	2012	155		44-49
19002	Dobson, M., Hildrew, A. G., Orton, S. and Ormerod, S. J.	INCREASING LITTER RETENTION IN MOORLAND STREAMS - ECOLOGICAL AND MANAGEMENT ASPECTS OF A FIELD EXPERIMENT	Freshwater Biology	1. The retention characteristics of two moorland streams in mid-Wales were manipulated for 2 years by the addition of small traps which accumulated detritus. Leaf litter was also added to these essentially treeless streams at regular intervals to simulate natural inputs to a woodland stream. 2. Leaf traps retained a significantly higher biomass of detritus - both naturally occurring and added - t…	1995	33	2	325-337
19003	Dodelin, B.	Saproxylic beetle biodiversity in old-growth forests of the south-east of France	Plant Biosystems	This study compared the richness of saproxylic beetle species and the composition of species assemblages between the major forests types of the south-east of France. The forests differed by their geographical position and their composition in tree species. The results confirmed the existence of a clear local identity of the saproxylic beetles communities. This identity combined three geographical…	2010	144	1	262-270
19004	Doerr, Nicole, Kaiser, Klaus, Sauheitl, Leopold, Lamersdorf, Norbert, Stange, C. Florian and Guggenberger, Georg	Fate of ammonium N-15 in a Norway spruce forest under long-term reduction in atmospheric N deposition	Biogeochemistry	In the last decades, in particular forest ecosystems became increasingly N saturated due to elevated atmospheric N deposition, resulting from anthropogenic N emission. This led to serious consequences for the environment such as N leaching to the groundwater. Recent efforts to reduce N emissions raise the question if, and over what timescale, ecosystems recover to previous conditions. In order to…	2012	107	2019-01-03	409-422
19005	Domisch, T., Finer, L., Karsisto, M., Laiho, R. and Laine, J.	Relocation of carbon from decaying litter in drained peat soils	Soil Biology & Biochemistry	Recent findings have indicated that the carbon density and store in peat soil may increase after drainage for forestry, even if soil respiration has clearly increased. This is caused by the increased organic C flow from tree stands into soil and consequent retention in the pear matrix. Relocation of C-14-activity released from the labelled needle and fine root litter during 4- and 8-month incubat…	1998	30	12	1529-1536
19006	Domisch, T., Finer, L., Laiho, R., Karsisto, M. and Laine, J.	Decomposition of Scots pine litter and the fate of released carbon in pristine and drained pine mires	Soil Biology & Biochemistry	A field experiment was carried out to validate the results of a previous laboratory experiment showing that part of the carbon released from decaying Scots pine (Pinus sylvestris L.) needle and fine root litter was retained in the peat soil. C-14-labelled litter was incubated for up to 1.5 years in pristine and drained pear soils. During this period, 40-60% of the: initial C-14-activity was lost …	2000	32	2019-11-12	1571-1580
19007	Dreimanis, A. A.	Variation in the fall of female strobili in Pinus sylvestris	Genet. issled. drevesn. v LatvSSR.	[Cf. FA 35, 6732] In Latvia the expected yield of seed plantations was not realized owing to the shedding of 43% of female cones. The clones differed markedly in the number of cones retained. The greatest losses were in the clones with the largest cones.	1975			89-93
19008	Drenkhan, R., Agan, A., Palm, K., Rosenvald, R., Jurisoo, L., Maaten, T., Padari, A. and Drenkhan, T.	Overview of ash and ash dieback in Estonia	Book	In Estonia, European ash (Fraxinus excelsior) grows close to the northern border of its' natural range in Europe. European ash is a widespread, but not copious deciduous tree species characterized by scattered distribution in mixed forests all over Estonia. In the recent work the health conditions of growing in Estonia 13 different Fraxinus species (incl. native European ash) were estimated. In g…	2017
19009	Drenkhan, R. and Hanso, M.	Needle retention, needle density and growth rate of Scots pine (Pinus sylvestris L.)	Metsanduslikud Uurimused	The Needle Trace Method (NTM) was used in a study into the relations between tree growth rate and needle age at time of needle loss, of eight 110-year-old and three 50-year-old Scots pine (Pinus sylvestris) trees growing in Elva Forest, Konguta, South Estonia. Needle characteristics obtained by the NTM were matched against both stand and individual tree growth parameters. A low correlation was ob…	2000	34		85-91
19010	Drenkhan, R. and Hanso, M.	Recent natural disturbances in Scots pine (Pinus sylvestris L.) plantations and stands of South-East Estonia: Causes and consequences	Book Section		2004
19011	Drenkhan, R. and Hanso, M.	Deviations in needle characteristics of Scots pine (Pinus sylvestris L.) caused by severe winters in South-East Estonia	Transactions of the Faculty of Forestry, Estonian Agricultural University	In the spring of 2003 massive deaths of Scots pine trees were registered on drought-sensitive oligotrophic sandy soils in South-East Estonia. The provisional diagnosis cited Gremmeniella shoot canker as the possible cause of the death of several thousand pines of different ages. After careful diagnostic work it was ascertained that the death of the pines was not caused by G. abietina. What then c…	2005		38	2019-09-20
19012	Drossler, Lars, Fahlvik, Nils, Wysocka, Natalia K., Hjelm, Karin and Kuehne, Christian	Natural Regeneration in a Multi-Layered Pinus sylvestris-Picea abies Forest after Target Diameter Harvest and Soil Scarification	Forests	Forest management in Sweden can be characterized by even-aged silviculture heavily relying on three established harvest regimes: clearcutting, the seed-tree method, and the shelterwood system. Less intense, small-scale retention harvest systems such as single tree and group selection harvest are rarely used. In addition, natural regeneration dynamics without enrichment planting have barely been s…	2017	8	2
19013	Duan, Baoli, Paquette, Alain, Juneau, Philippe, Brisson, Jacques, Fontaine, Bastien and Berninger, Frank	Nitrogen resorption in Acer platanoides and Acer saccharum: influence of light exposure and leaf pigmentation	Acta Physiologiae Plantarum	We investigated the effects of leaf color change in the fall on photosynthetic production and nitrogen resorption. Seedlings of Acer platanoides L. and A. saccharum Marsh. were grown in a shade house for 5 months in either 21 % (intermediate light, M) or 4.9 % (low light, L) of incident irradiance. After this period, a subset of the intermediate-light grown seedlings was transferred to a high-lig…	2014	36	11	3039-3050
19014	Durlo, G. B., Malek, S. and Socha, J.	Extreme precipitation events in the Forest Promotion Complex of Silesian Beskid	Folia Forestalia Polonica. Series A, Forestry	An increase in frequency of weather phenomena in the Western Beskids that are disadvantageous for natural environment caused an upset of ecologic balance, especially within the scope of water management and retention. Concerns referring to forest groups maintaining their stability are fully justified, regarding that in many areas of the Beskids, there is an intensive reconstruction of stands of t…	2015	57	1	18-27
19015	Dutilleul, P., Nef, L. and Frigon, D.	Assessment of site characteristics as predictors of the vulnerability of Norway spruce (Picea abies Karst.) stands to attack by Ips typographus L-(Col., Scolytidae)	Journal of Applied Entomology-Zeitschrift Fur Angewandte Entomologie	The intensity of bark beetle Ips typographus L. (Col., Scolytidae) attack on Norway spruce (Picea abies Karst.) is known to vary greatly among stands. In a control strategy approach, previous studies investigated the relationships between the variability in intensity off. typographus attack and site characteristics such as stand age and altitude, mean tree circumference, growth rate and nearest-n…	2000	124	1	2019-01-05
19016	Duursma, R. A., Kolari, P., Peramaki, M., Nikinmaa, E., Hari, P., Delzon, S., Loustau, D., Ilvesniemi, H., Pumpanen, J. and Makela, A.	Predicting the decline in daily maximum transpiration rate of two pine stands during drought based on constant minimum leaf water potential and plant hydraulic conductance	Tree Physiology	The effect of drought on forest water use is often estimated with models, but comprehensive models require many parameters, and simple models may not be sufficiently flexible. Many tree species, Pinus species in particular, have been shown to maintain a constant minimum leaf water potential above the critical threshold for xylem embolism during drought. In such cases, prediction of the relative d…	2008	28	2	265-276
19017	Dynesius, Mats	Slow recovery of bryophyte assemblages in middle-aged boreal forests regrown after clear-cutting	Biological Conservation	Clear-cutting followed by even-aged forestry is transforming forests around the globe. There is growing concern that considerable parts of the native forest biodiversity will not be able to re-colonize these new stands before the next clear-cutting. The development of species assemblages during the full forestry rotation period must be understood in order to assess the need for management adaptat…	2015	191		101-109
19018	Dynesius, Mats, Astrom, Marcus and Nilsson, Christer	Microclimatic buffering by logging residues and forest edges reduces clear-cutting impacts on forest bryophytes	Applied Vegetation Science	Question: The practice of extracting logging residues after clear-cutting for bioenergy purposes is spreading. Logging residues constitute a shelter in clear-cut areas and therefore concerns have been expressed that their removal Could make the ground and its vegetation more exposed to extreme micro-climatic conditions. We asked whether logging residues and forest edges can protect ground-dwellin…	2008	11	3	345-354
19019	Earnshaw, Mark R., Paul, Alexander G., Loos, Robert, Tavazzi, Simona, Paracchini, Bruno, Scheringer, Martin, Hungerbuehler, Konrad, Jones, Kevin C. and Sweetman, Andrew J.	Comparing measured and modelled PFOS concentrations in a UK freshwater catchment and estimating emission rates	Environment International	The lifecycle, sources and fate of perfluorooctane sulfonate (PFOS) continue to generate scientific and political interest, particularly since PFOS was listed by the Stockholm Convention and largely restricted in Europe. It continues to be detected in aquatic environments, with only limited studies into the on-going sources. This paper explores PFOS emissions discharged by the general population …	2014	70		25-31
19020	Eckstein, R. L.	Nitrogen retention by Hylocomium splendens in a subarctic birch woodland	Journal of Ecology	1 Nutrient dynamics and growth of the feathermoss Hylocomium splendens were studied in a subarctic birch woodland. My aims were to estimate the species' nutrient use strategy (and its determinants: mean residence time (MRT) and annual nutrient productivity (aNP)) and to unravel possible traits related to nutrient conservation and their implications for ecosystem nitrogen flux. Three methods to es…	2000	88	3	506-515
19021	Eden, J. and Rennerfelt, E.	Field and decay-chamber experiments to ascertain the protective effect of various wood preservatives	Meddelanden fran Statens Skogsforskningsinstitut	Stakes and poles of Pinus sylvestris were used in tests begun in 1943 on the preservative effect of Tanalith U, Boliden salt, Boliden fluorine salt and coal-tar creosote. The wood was placed in 4 plots in different parts of southern Sweden, in a mine shaft and in a greenhouse. Details of preservative retentions are tabulated. Results, after 52 months, are given in graphs and tables. In the plots,…	1949	38	4	35-35
19022	Edenius, Lars, Ericsson, Goran, Kempe, Goran, Bergstrom, Roger and Danell, Kjell	The effects of changing land use and browsing on aspen abundance and regeneration: a 50-year perspective from Sweden	Journal of Applied Ecology	P>1. Management of trees with high conservation value under altered land use is challenging. This applies to European aspen Populus tremula, a keystone tree species for species conservation in northern forests. Fire suppression in managed forest has reduced niches for sexual regeneration in aspen while levels of browsing have increased with increasing numbers of ungulate herbivores. 2. We combine…	2011	48	2	301-309
19023	Edenius, Lars, Mansson, Johan, Hjortstrale, Tobias, Roberge, Jean-Michel and Ericsson, Goran	Browsing and damage inflicted by moose in young Scots pine stands subjected to high-stump precommercial thinning	Scandinavian Journal of Forest Research	In Fennoscandia, young stands of Scots pine (Pinus sylvestris L.) are intensively used by moose (Alces alces L.) during winter. We studied whether forage amounts on high-cut pines in high-stump commercial thinning influenced browsing intensity and damage incidence on retained (i.e. uncut) pine stems. High-cut pines were browsed, but to a lesser extent than retained pines. At a scale corresponding…	2015	30	5	382-387
19024	Edenius, Lars, Mikusinski, Grzegorz, Witzell, Johanna and Bergh, Johan	Effects of repeated fertilization of young Norway spruce on foliar phenolics and arthropods: Implications for insectivorous birds' food resources	Forest Ecology and Management	Repeated fertilization of young forests is a promising concept to increase the production of wood fiber, but the consequences of intense fertilization regimes on forest birds and their food resources, mediated through changes in the foliar chemistry are inadequately known. We assessed the effects of repeated fertilization in stands of young Norway spruce (Picea abies) on foliar phenolics and arth…	2012	277		38-45
19025	Edling, N.	Reforms in the Swedish County Forestry Boards	Svenska Skogsvardsforeningens Tidskrift	Under new regulations, the Swedish County Forestry Boards remain largely independent and their activities will continue as before, with particular emphasis on educational and instructional work and on artificial regeneration. A representative of the forest rangers of each area may now take part in discussion, but not in actual decisions, at board meetings. Provision has been made for the chairman…	1946	44	4	350-6
19026	Edwards, David M., Jay, Marion, Jensen, Frank S., Lucas, Beatriz, Marzano, Mariella, Montagne, Claire, Peace, Andrew and Weiss, Gerhard	Public Preferences Across Europe for Different Forest Stand Types as Sites for Recreation	Ecology and Society	A Delphi survey involving experts in forest preference research was carried out to derive scores for the recreational value of 240 forest stand types across Europe. The survey was organized around four regional panels: Great Britain, Nordic Region, Central Europe, and Iberia. In each region, 60 forest stand types were defined according to five forest management alternatives (FMAs) on a continuum …	2012	17	1
19027	Edwards, G. S., Friend, A. L., Oneill, E. G. and Tomlinson, P. T.	SEASONAL PATTERNS OF BIOMASS ACCUMULATION AND CARBON ALLOCATION IN PINUS-TAEDA SEEDLINGS EXPOSED TO OZONE, ACIDIC PRECIPITATION, AND REDUCED SOIL MG	Canadian Journal of Forest Research-Revue Canadienne De Recherche Forestiere	Seasonal patterns of biomass accumulation and carbon allocation were determined for 1-year-old loblolly pine (Pinus taeda L.) seedlings grown in soil having either 15 or 35-mu-g Mg.g-1 and exposed to subambient, ambient, or twice ambient levels of ozone (O3) and simulated rainfall at pH 3.8 or 5.2 in open-top chambers. Seedlings were harvested during the 1988 dormancy period, immediately prior to…	1992	22	5	640-646
19028	Eggers, Jeannette, Holmstrom, Hampus, Lamas, Tomas, Lind, Torgny and Ohman, Karin	Accounting for a Diverse Forest Ownership Structure in Projections of Forest Sustainability Indicators	Forests	In this study, we assessed the effect of a diverse ownership structure with different management strategies within and between owner categories in long-term projections of economic, ecological and social forest sustainability indicators, representing important ecosystem services, for two contrasting Swedish municipalities. This was done by comparing two scenarios: one where the diversity of manag…	2015	6	11	4001-4033
19029	Eggers, Sonke and Low, Matthew	Differential demographic responses of sympatric Parids to vegetation management in boreal forest	Forest Ecology and Management	Large-scale removal of small-diameter trees (i.e. thinning from below) in boreal forest can diminish niche diversity for birds that rely on a well-developed understory for nesting and foraging. Yet, few studies have examined how reduced niche diversity in managed forests affects fitness measures in closely-related species and the ability of competing species to co-exist. We related forest thinnin…	2014	319		169-175
19030	Egnell, Gustaf	Is the productivity decline in Norway spruce following whole-tree harvesting in the final felling in boreal Sweden permanent or temporary?	Forest Ecology and Management	The growing demand for renewable energy sources in Sweden has resulted in an increased use of forest biomass that now includes logging residues. However, concern has been raised that the moderate increase in biomass removal associated with whole-tree harvesting results in a significant increase in nutrient removal, which in turn has a negative effect on future forest growth. Productivity over 31 …	2011	261	1	148-153
19031	Ehn, M., Kleist, E., Junninen, H., Petaja, T., Lonn, G., Schobesberger, S., Dal Maso, M., Trimborn, A., Kulmala, M., Worsnop, D. R., Wahner, A., Wildt, J. and Mentel, Th F.	Gas phase formation of extremely oxidized pinene reaction products in chamber and ambient air	Atmospheric Chemistry and Physics	High molecular weight (300-650 Da) naturally charged negative ions have previously been observed at a boreal forest site in Hyytiala, Finland. The long-term measurements conducted in this work showed that these ions are observed practically every night between spring and autumn in Hyytiala. The ambient mass spectral patterns could be reproduced in striking detail during additional measurements of…	2012	12	11	5113-5127
19032	Ehnstrom, B.	Leaving dead wood for insects in boreal forests - Suggestions for the future	Scandinavian Journal of Forest Research	Increasing the amount of dead wood in managed forests is one of the prerequisites for the successful preservation of various organisms. Dead wood and its associated fungi with it provide resources for many insects. Various methods have been used to artificially enhance the quantity of dead wood in managed forests. Creation of high stumps in connection with the final logging of the stand and leavi…	2001			91-98
19033	Eid, T., Hoen, H. F. and Okseter, P.	Economic consequences of sustainable forest management regimes at non-industrial forest owner level in Norway	Forest Policy and Economics	Consequences for net present value, net income and hat-vest related to 'sustainable forest management regimes' at non-industrial forest owner level in Norway are discussed. The following indicators of a sustainable forest management have been analysed: existing old forest set aside for preservation, maintaining minimum target levels for area covered by old forest through time, restricted treatmen…	2001	2	2019-03-04	213-228
19034	Eid, T., Hoen, H. F. and Okseter, P.	Timber production possibilities of the Norwegian forest area and measures for a sustainable forestry	Forest Policy and Economics	This paper presents long-range forest management analyses with the objective of mapping consequences for the timber production potential when forest management treatments are changed in an environmentally oriented direction. Sample plots from the National Forest Inventory, covering the entire productive forest area in Norway, were aggregated into 10000 treatment units. Management strategies maxim…	2002	4	3	187-200
19035	Ejhed, H., Fang, J., Graae, L., Rahmberg, M., Magner, J., Dorgeloh, E. and Plaza, G.	The effect of hydraulic retention time in onsite wastewater treatment and removal of pharmaceuticals, hormones and phenolic utility substances	Science of the Total Environment	Micropollutants such as pharmaceuticals, hormones and phenolic utility chemicals in sewage water are considered to be an emerging problem because of increased use and observed adverse effects in the environment. The study provides knowledge on the removal efficiency of micropollutants with a range of physical and chemical properties in three commercially available onsite wastewater treatment faci…	2018	618		250-261
19036	Ekvall, Hans, Bostedt, Goran and Jonsson, Mattias	Least-cost allocation of measures to increase the amount of coarse woody debris in forest estates	Journal of Forest Economics	Coarse woody debris (CWD) is crucial for maintaining biodiversity in forests but conservation measures to increase CWD must be performed cost efficiently. We estimate least-cost combinations of CWD-increasing measures in a spruce-dominated Swedish forest estate. Specifically, we investigate how using combinations of the measures tree retention, creating high stumps, manual scarification, prolonge…	2013	19	3	267-285
19037	Elfving, B. and Jakobsson, R.	Effects of retained trees on tree growth and field vegetation in Pinus sylvestris stands in Sweden	Scandinavian Journal of Forest Research	As a result of legislation and forest certification schemes, retention of dead and live trees has become common in forest management. This study investigated the effect of retained Scots pines (Pinus sylvestris L.) on production and field vegetation in the new stand. Stem volume per hectare and field vegetation composition at different distances from retained trees were examined for 60 trees on 2…	2006	21		29-36
19038	Eliasson, L., Bengtsson, J., Cedergren, J. and Lageson, H.	Comparison of single-grip harvester productivity in clear- and shelterwood cutting	Journal of Forest Engineering	An increased interest in the use of shelterwood stands to promote regeneration has led to an interest in how single-grip harvester productivity is affected by shelterwood cutting compared with clearcutting. A comparative time study of a large single-grip harvester was made in a spruce [Picea abies] stand in northern Sweden. Three treatments were used. Shelterwood cutting leaving: (1) a sparse sta…	1999	10	1	43-48
19039	Eliasson, L. and Hallmen, U.	TRANSLOCATION AND METABOLISM OF PICLORAM AND 2,4-D IN POPULUS-TREMULA	Physiologia Plantarum		1973	28	1	182-187
19040	Eliasson, Peter E. and Agren, Goran I.	Feedback from soil inorganic nitrogen on soil organic matter mineralisation and growth in a boreal forest ecosystem	Plant and Soil	Current nitrogen (N) deposition rates are considerably higher than during pre-industrial times and the growing interest in forest fertilisation requires better understanding of how the N and carbon (C) cycles interact. This study is based on experimental data showing how Scots pine (Pinus sylvestris L.) forests respond to single or consecutive pulse doses of N. The data were used to support the i…	2011	338	2019-01-02	193-203
19041	Elofsson, M. and Gustafsson, L.	Uncommon vascular plant species in an East-Central Swedish forest area - a comparison between young and old stands	Nordic Journal of Botany	Abundance of uncommon vascular plant species (indicator species and red-listed species) was recorded in 120 circular (12.6 m(2)) random plots in young (10-24 years after clearcutting) and old (>80 years) forest stands, respectively, in the forest area of Vallen (2 600 ha), ca. 80 km north of Stockholm, Sweden. Factors describing stand density, field-layer and soil moisture were recorded. A total …	2000	20	1	51-60
19042	Elumeeva, Tatiana G., Soudzilovskaia, Nadejda A., During, Heinjo J. and Cornelissen, Johannes H. C.	The importance of colony structure versus shoot morphology for the water balance of 22 subarctic bryophyte species	Journal of Vegetation Science	Questions: What are the water economy strategies of the dominant subarctic bryophytes in terms of colony and shoot traits? Can colony water retention capacity be predicted from morphological traits of both colonies and separate shoots? Are suites of water retention traits consistently related to bryophyte habitat and phylogenetic position? Location: Abisko Research Station, North Sweden. Methods:…	2011	22	1	152-164
19043	Emmett, B. A., Brittain, S. A., Hughes, S., Gorres, J., Kennedy, V., Norris, D., Rafarel, R., Reynolds, B. and Stevens, P. A.	NITROGEN ADDITIONS (NANO3 AND NH4NO3) AT ABER FOREST, WALES .1. RESPONSE OF THROUGHFALL AND SOIL-WATER CHEMISTRY	Forest Ecology and Management	Nitrogen was sprayed weekly onto the forest floor of a Sitka spruce stand for 2.5 years in a replicated block design experiment to investigate the impacts of chronic atmospheric nitrogen deposition, in both oxidised and reduced form, on these ecosystems. The nitrogen was applied as sodium nitrate at 35 or 75 kg N ha(-1) year(-1) and as ammonium nitrate at 35 kg N ha(-1) year(-1), and the response…	1995	71	2019-01-02	45-59
19044	Enander, M.	Choice of seed tree and grading of seed and plants of Scots Pine and Norway Spruce	Svenska Skogsvardsforeningens Tidskrift	(i) Seedbearers: Trees above the mean for the stems of best dimensions in a stand can be regarded as extreme 'plus variants' and it is recommended that these should be retained as seedbearers until natural regeneration is obtained, then removed in a good seed year when the seed can be corrected for use in nurseries or for direct sowings. For the latter purposes the seed trees should be as uniform…	1946	44	4	310-28
19045	Engstrom, Johanna, Nilsson, Christer and Jansson, Roland	Effects of stream restoration on dispersal of plant propagules	Journal of Applied Ecology	Species immigration is vital for the success of restoring degraded ecosystems, but the effectiveness of enhancing dispersal following restoration is seldom evaluated. Running water is an important vector for plant dispersal. Frequency and duration of floods and channel-network complexity are important factors influencing propagule dispersal. In Sweden, these functions have been modified by channe…	2009	46	2	397-405
19046	Entwistle, P. F. and Adams, P. H. W.	PROLONGED RETENTION OF INFECTIVITY IN NUCLEAR POLYHEDROSIS-VIRUS OF GILPINIA-HERCYNIAE (HYMENOPTERA, DIPRIONIDAE) ON FOLIAGE OF SPRUCE SPECIES	Journal of Invertebrate Pathology		1977	29	3	392-394
19047	Eriksson, Erik, Gillespie, Andrew R., Gustavsson, Leif, Langvall, Ola, Olsson, Mats, Sathre, Roger and Stendahl, Johan	Integrated carbon analysis of forest management practices and wood substitution	Canadian Journal of Forest Research-Revue Canadienne De Recherche Forestiere	The complex fluxes between standing and harvested carbon stocks, and the linkage between harvested biomass and fossil fuel substitution, call for a holistic, system-wide analysis in a life-cycle perspective to evaluate the impacts of forest management and forest product use on carbon balances. We have analysed the net carbon emission under alternative forest management strategies and product uses…	2007	37	3	671-681
19048	Eriksson, J.	Retention and mobilisation of trinitrotoluene, aniline, nitrobenzene and toluene by soil organic matter	Acta Universitatis Agriculturae Sueciae - Silvestria	For decades, the fate of trinitrotoluene (TNT) in soil environments has interested researchers around the world. Due to its toxicity and locally high concentrations in soils and sediments, a proper risk assessment requires detailed knowledge of the type of bonds formed between TNT (and its degradation products) and major soil components. In the work described in this thesis, the effects of differ…	2003		266	I-IV
19049	Eriksson, K. E.	A study of storing and preservation conditions of wet Spruce mechanical pulp. 3. The mechanism of the inactivation of the preservative properties of phenyl mercury acetate by groundwood pulp	Svensk Papperstidning	In further studies at Swedish Forest Products Res. Lab., Stockholm, it was shown inter alia that metallic ions cannot displace the phenylmercurie ions from groundwood pulp. At pH values <4.2 the retention of phenyl mercury acetate (PMA) was diminished owing to the low dissociation of the carboxylic groups. Chromatographic analysis of acetone extracts of PMA-impregnated pulp indicated that the PMA…	1961	10		381-385
19050	Eriksson, K. E.	A study of storing and preservation conditions of wet Spruce mechanical pulp. 4. A chemical method for determining the storage quality of groundwood pulp	Svensk Papperstidning	In further studies at Swedish Forest Products Res. Lab., Stockholm, it was shown inter alia that metallic ions cannot displace the phenylmercurie ions from groundwood pulp. At pH values <4.2 the retention of phenyl mercury acetate (PMA) was diminished owing to the low dissociation of the carboxylic groups. Chromatographic analysis of acetone extracts of PMA-impregnated pulp indicated that the PMA…	1962	65	13	521-525
19051	Eriksson, K. E., Kiessling, H. and Steenberg, B.	A study of storing and preservation conditions of wet Spruce mechanical pulp. 2. Ion exchange properties of Spruce groundwood pulp with special regard to the fungicide phenyl mercury acetate	Svensk Papperstidning	In further studies at Swedish Forest Products Res. Lab., Stockholm, it was shown inter alia that metallic ions cannot displace the phenylmercurie ions from groundwood pulp. At pH values <4.2 the retention of phenyl mercury acetate (PMA) was diminished owing to the low dissociation of the carboxylic groups. Chromatographic analysis of acetone extracts of PMA-impregnated pulp indicated that the PMA…	1961	64	9	329-335
19052	Eriksson, Ljusk A., Sallnas, Ola and Stahl, Goran	Forest certification and Swedish wood supply	Forest Policy and Economics	A number of measures have been introduced into Swedish forestry in order to satisfy demands on biodiversity and sustainability. Protection measures include set asides, areas with continuous cover forestry and retention trees on harvesting sites, to name but a few. Most of these practices will have implications for the total wood supply of the Swedish forests. In 1998, the Swedish standard for for…	2007	9	5	452-463
19053	Eriksson, Miikka, Lilja, Saara and Roininen, Heikki	Dead wood creation and restoration burning: Implications for bark beetles and beetle induced tree deaths	Forest Ecology and Management	Dead wood creation is an important tool for restoring the natural characteristics of boreal managed forests, where the amount of dead wood has seriously declined as a result of forest management practices. Although many forest species would benefit from restoration, foresters are concerned about the increased risk of bark beetle attacks on surrounding managed forests. In our study, we investigate…	2006	231	2019-01-03	205-213
19054	Eriksson, Miikka, Neuvonen, Seppo and Roininen, Heikki	Retention of wind-felled trees and the risk of consequential tree mortality by the European spruce bark beetle Ips typographus in Finland	Scandinavian Journal of Forest Research	Autumn storms felled about 7 million m(3) of forest in southern Finland in 2001. Windthrow area and timber characteristics, as well as numbers of standing spruce trees attacked and killed by Ips typographus, were recorded in 61 Norway spruce [Picea abies (L.) Karst.]-dominated windthrow areas. Generalized linear models were used to identify significant variables predicting the risk for consequent…	2007	22	6	516-523
19055	Ernstberger, H. and Sokollek, V.	Influence of various vegetation types on snow cover development and snowmelt runoff at lower elevations in the central German highlands	Snow hydrologic research in central Europe	Studies from 1978 to 1982 are reported in two areas in Hesse. Highest snow water equivalent values were observed in shrubby vegetation and in secondary vegetation in open areas following fellings; lowest values were observed in Norway spruce stands, as a result of snow retention and interception by crowns. Snowmelt under spruce was considerably slower than in the open. Snowmelt runoff from forest…	1984			317-329
19056	Erstad, K. J.	Fertilizing and liming in a heather area of Norway	Journal of Forest Science	In a 6-year field experiment in a podzolized heather area in Norway, the effects of liming and P and Cu fertilizer application were tested versus changes in vegetation and soil chemistry. The vegetation altered slowly, particularly the woody species, but pronounced over years. Liming had a positive effect on all species except Deschampsia flexuosa and Vaccinium myrtillus, P tended to favour all e…	2006	52	Special Issue	52-57
19057	Esch, A. and Mengel, K.	Combined effects of acid mist and frost on the water status of young spruce trees (Picea abies)	Chemosphere	Acid mist (pH 3) precipitation led to a degradation of the epicuticular waxes of the youngest needles. Under the influence of frost drought in spring those affected trees resulted in a detrimental decline in needle water potential and turgor potential. The results indicate that a damaged, poor cuticle loweres the water retention capability and increases water losses by non stomatal, cuticular tra…	1998	36	2019-04-05	645-650
19058	Esch, A. and Mengel, K.	Combined effects of acid mist and frost drought on the water status of young spruce trees (Picea abies)	Environmental and Experimental Botany	This investigation was focused on the effect of frost drought following acid mist exposure on the water status and CO2 assimilation of young spruce trees (Picea abies). Trees cultivated in special containers were exposed to acid mist with pH 3 and a control mist with pH 5 for 10 weeks with three mist events per week during autumn. Frost drought: indicating frozen soil with atmospheric conditions …	1998	39	1	57-65
19059	Espeby, B.	TRACING THE ORIGIN OF NATURAL-WATERS IN A GLACIAL TILL SLOPE DURING SNOWMELT	Journal of Hydrology		1990	118	2019-01-04	107-127
19060	Esper, Jan, Carnelli, Adriana L., Kamenik, Christian, Filot, Marc, Leuenberger, Markus and Treydte, Kerstin	Spruce tree-ring proxy signals during cold and warm periods	Dendrobiology	The strength and temporal rigidity of climate signals are important characteristics of proxy data used to reconstruct climate variability over pre-instrumental periods. Here, we assess the performance of different tree-ring proxies, including ring width, maximum latewood density, delta C-13, and delta O-18, during exceptional cold (1800-1850) and warm periods (1946-2000). The analysis was conduct…	2017	77		2019-03-18
19061	Ettlinger, L.	On the genus Crumenula sensu Rehm, with special reference to the Crumenula die-back of the shoots of Pinus species	Book	In the Swiss Alpine forest plantings visited by the author the forms assumed by Crumenula abietina[Gremmeniella abietina] on pines [R.A.M., xxiii, p. 200] presented certain anomalies in comparison with material from Denmark [ibid., xx, p. 41] and descriptions. They do not, however, transcend the limits of physiologic race differences, and the erection of a new species is accordingly not proposed.…	1945
19062	Evankow, Ann, Christie, Hartvig, Hancke, Kasper, Brysting, Anne K., Junge, Claudia, Fredriksen, Stein and Thaulow, Jens	Genetic heterogeneity of two bioeconomically important kelp species along the Norwegian coast	Conservation Genetics	Knowledge of genetic diversity among wild populations is becoming increasingly important as more species are recognized for their bioeconomic value. Industrialization of natural resources, such as kelp in the marine shallow sublittoral zone through cultivation and wild-harvesting, may lead to extensive translocation and local population decimation. Without adequate resilience in the form of genet…	2019	20	3	615-628
19063	Ezquerro, Marta, Pardos, Marta and Diaz-Balteiro, Luis	Integrating variable retention systems into strategic forest management to deal with conservation biodiversity objectives	Forest Ecology and Management	For the past few decades, the integration of biodiversity conservation into forest management has constituted an important challenge, since the new forest management models should make conservation objectives compatible with production issues. In many countries, timber production is no longer the main ecosystem service provided, thus other aspects such as biodiversity conservation are taken into …	2019	433		585-593
19064	Fageria, Manphool S. and Rajora, Om P.	Effects of harvesting of increasing intensities on genetic diversity and population structure of white spruce	Evolutionary Applications	Forest harvesting of increasing intensities is expected to have intensifying impacts on the genetic diversity and population structure of postharvest naturally regenerated stands by affecting the magnitude of evolutionary processes, such as genetic drift, gene flow, mating system, and selection. We have tested this hypothesis for the first time by employing widely distributed boreal white spruce …	2013	6	5	778-794
19065	Fahlvik, Nils, Agestam, Eric, Eko, Per Magnus and Linden, Magnus	Development of single-storied mixtures of Norway spruce and birch in Southern Sweden	Scandinavian Journal of Forest Research	In a stand with planted Norway spruce (Picea abies (L.) Karst.) and naturally regenerated birch (Betula pendula Roth and B. pubescens Ehrh.) in southern Sweden, the proportion of birch was reduced in 0.1-ha plots at pre-commercial thinning to 0%, 20% or 50% of the total stem number (2000-2500 stems ha(-1) after the thinning). The growth of both species was surveyed 4 and 10 years later. No signif…	2011	26		36-45
19066	Falkengrengrerup, U.	REPLACEMENT OF NUTRIENT LOSSES CAUSED BY ACIDIFICATION OF A BEECH FOREST SOIL AND ITS EFFECTS ON TRANSPLANTED FIELD-LAYER SPECIES	Plant and Soil	Acidification of south Swedish forest soils has caused considerable decreases in pH and exchangeable cations during recent decades. The lowered abundance of several field-layer species is probably related to the altered soil chemistry. The present study focuses on the importance for the vegetation of reduced amounts of Ca, Mg and K. These elements were applied separately or mixed as Cl+SO4, six t…	1995	168		187-193
19067	Falkengrengrerup, U. and Tyler, G.	EXPERIMENTAL-EVIDENCE FOR THE RELATIVE SENSITIVITY OF DECIDUOUS FOREST PLANTS TO HIGH SOIL ACIDITY	Forest Ecology and Management	Thirteen species of deciduous forest vascular plants were established from seeds: Brachypodium sylvaticum, Carex sylvatica, Circaea lutetiana, Deschampsia flexuosa, Galium odoratum, Lamium galeobdolon, Lathyrus vernus, Luzula pilosa, Milium effusum, Poa nemoralis, Sanicula europaea, Stellaria holostea and Stellaria nemorum. An acid beech forest soil was variously treated with carbonates (CaCO3 + …	1993	60	2019-03-04	311-326
19068	Farrell, E. P., Nilsson, S. I., Wiklander, G. and Tamm, C. O.	DISTRIBUTION OF SULFUR FRACTIONS IN LYSIMETERS PREVIOUSLY TREATED WITH SULFURIC-ACID, NPK FERTILIZER AND A COMBINATION OF ACID AND FERTILIZER	Forest Ecology and Management		1984	8	1	41-57
19069	Farrell, E. P., Wiklander, G., Nilsson, S. I. and Tamm, C. O.	DISTRIBUTION OF NITROGEN IN LYSIMETERS PREVIOUSLY TREATED WITH SULFURIC-ACID AND A COMBINATION OF ACID AND FERTILIZER	Forest Ecology and Management		1984	8	2019-03-04	265-279
19070	Fawaris, B. H.	Behavior of 137Cs in the boreal forest ecosystem of Central Sweden	Book	A study was made of the behaviour of Chernobyl fallout 137Cs in a coniferous forest ecosystem in central Sweden from 1990 to 1994. Fallout 137Cs from the Chernobyl nuclear accident (CNA) was retained (85%) in the upper 5 cm of humic forest soil layer, with a migration deeper into soil profile. There was no correlation between forest soil exchangeable and total potassium (K+) and 137Cs transfer pa…	1995
19071	Fedorkov, A., Lindgren, D. and David, A.	Genetic gain and gene diversity following thinning in a half-sib plantation	Silvae Genetica	Status number, gene diversity, inbreeding coefficient and genetic gain were calculated following phenotypic rogueing of different intensities in a half-sib progeny plantation of Scots pine (Pinus sylvestris L.). Across most selection intensities the status number, gene diversity and genetic gain remained favorably high while the inbreeding coefficient was remarkably stable. It is suggested that p…	2005	54	2019-04-05	185-189
19072	Feger, K. H.	NITROGEN CYCLING IN 2 NORWAY SPRUCE (PICEA-ABIES) ECOSYSTEMS AND EFFECTS OF A (NH4)2SO4 ADDITION	Water Air and Soil Pollution	Nitrogen cycling in two Norway spruce (Picea abies (L.) Karst.) ecosystems in the ARINUS experimental watershed areas Schluchsee and Villingen (Black Forest, SW Germany) and initial effects of a (NH4)2SO4 treatment are discussed. Although N reserves in the soils are similar and atmospheric N input is the same low to moderate level characteristic for many forested areas in SW Germany, N export by …	1992	61	2019-03-04	295-307
19073	Feger, K. H.	SOLUTE FLUXES AND SULFUR CYCLING IN FORESTED CATCHMENTS IN SW GERMANY AS INFLUENCED BY EXPERIMENTAL (NH4)(2)SO4 TREATMENTS	Water Air and Soil Pollution	Results are presented from the research project ARINUS which investigates biogeochemical cycling in Norway spruce (Picea abies KARST,) ecosystems in the Black Forest (SW Germany) and effects of experimental (NH4)(2)SO4 additions. The interaction of the terrestrial and aquatic system is assessed using an integrated approach which combines flux measurements in representative plots on the stand leve…	1995	79	2019-01-04	109-130
19074	Feger, K. H., Zottl, H. W. and Brahmer, G.	ASSESSMENT OF THE ECOLOGICAL EFFECTS OF FOREST FERTILIZATION USING AN EXPERIMENTAL WATERSHED APPROACH	Fertilizer Research	In the research project ARINUS, the effects of restabilization measures (fertilization with readily soluble MgSO4) on the element cycling of Norway spruce ecosystems in the Black Forest (SW Germany) are studied. The objective is to quantify the natural and anthropogenic components of element cycling. Interrelations between the terrestrial and aquatic subsystem are assessed using an integrated app…	1991	27	1	49-61
19075	Feiza, Virginijus, Feiziene, Dalia, Jankauskas, Benediktas and Jankauskiene, Genovaite	The impact of soil management on surface runoff, soil organic matter content and soil hydrological properties on the undulating landscape of Western Lithuania	Zemdirbyste-Agriculture	The main objective or this paper is to summarise long-term experimental data oil sediment transport, soil organic matter (SOM) losses caused by water erosion and soil moisture potential. Results showed that higher soil losses promote greater SOM loss. Furthermore, various land use systems influence erosion rates and changes in soil physical properties. Erosion-preventive grass-grain crop rotation…	2008	95	1	2019-03-21
19076	Feiza, Virginijus, Feiziene, Dalia, Sinkeviciene, Ausra, Boguzas, Vaclovas, Putramentaite, Agne, Lazauskas, Sigitas, Deveikyte, Irena, Seibutis, Vytautas, Steponaviciene, Vaida and Pranaitiene, Simona	Soil water capacity, pore-size distribution and CO2 e-flux in different soils after long-term no-till management	Zemdirbyste-Agriculture	Little is known about the effects of modern soil management practices, especially no-tillage, on soil physical state, soil pore size distribution and soil water capacity after a long-time of successive application on different soil types. The investigations were performed in 2014 at the Institute of Agriculture, Lithuanian Research Centre for Agriculture and Forestry in Central Lithuania's lowlan…	2015	102	1	2019-03-14
19077	Feliksik, E. and Wilczynski, S.	Dendroclimatological analysis of the Norway spruce (Picea abies (L.) Karst.) from the Beskid Slaski Mountains	Zpravodaj Beskydy	Research concerning the influence of climatic conditions on the radial increment of spruce growing in the various climatic belts of the Beskid Slaski Mountains in the Czech Republic indicates that the thermal requirements of this species are higher than hitherto believed. Low temperatures at the end of winter and in spring were a significant factor limiting the size of the increment width of the …	2000	13		161-169
19078	Felton, Adam, Andersson, Erik, Ventorp, David and Lindbladh, Matts	A Comparison of Avian Diversity in Spruce Monocultures and Spruce-Birch Polycultures in Southern Sweden	Silva Fennica	The replacement of some spruce monocultures with stands composed of planted Norway spruce (Picea abies) and naturally regenerated birch (Betula spp.) has a range of potential benefits, but the implications for biodiversity are generally unknown. Here we conduct a paired replicated study in southern Sweden of the avian biodiversity found within Norway spruce monocultures, and within Norway spruce …	2011	45	5	1143-1150
19079	Felton, A., Hedwall, P. O., Lindbladh, M., Nyberg, T., Felton, A. M., Holmstrom, E., Wallin, I., Lof, M. and Brunet, J.	The biodiversity contribution of wood plantations: Contrasting the bird communities of Sweden's protected and production oak forests	Forest Ecology and Management	The oak-dominated woodlands and forests of northern Europe have experienced dramatic declines due to agriculture, urbanization, and conifer-dominated production forestry. These losses have had a substantial negative impact on biodiversity due to the large number of forest species which depend on oak and the environments oak-dominated forests provide. Production oak stands may serve as a means of …	2016	365		51-60
19080	Felton, Adam, Lindbladh, Matts, Brunet, Jorg and Fritz, Orjan	Replacing coniferous monocultures with mixed-species production stands: An assessment of the potential benefits for forest biodiversity in northern Europe	Forest Ecology and Management	Conifer dominated plantations in central and northern Europe are associated with relatively low ecological values, and in some cases, may be vulnerable to disturbances caused by anthropogenic climate change. This has prompted the consideration of alternative tree species compositions for use in production forestry in this region. Here we evaluate the likely biodiversity costs and benefits of supp…	2010	260	6	939-947
19081	Felton, Adam, Lindbladh, Matts, Elmberg, Johan, Felton, Annika M., Andersson, Erik, Sekercioglu, Cagan H., Collingham, Yvonne and Huntley, Brian	Projecting impacts of anthropogenic climatic change on the bird communities of southern Swedish spruce monocultures: will the species poor get poorer?	Ornis Fennica	The potential impact of climatic change on bird species' distributions in Europe was recently modeled for several scenarios of projected late 21st century climate. The results indicate mean range shifts of hundreds of kilometres north for many of European bird species. Here we consider the implications from such distributional shifts for the bird communities of Norway spruce (Picea abies) monocul…	2014	91	1	2019-01-13
19082	Felton, Adam, Sonesson, Johan, Nilsson, Urban, Lamas, Tomas, Lundmark, Tomas, Nordin, Annika, Ranius, Thomas and Roberge, Jean-Michel	Varying rotation lengths in northern production forests: Implications for habitats provided by retention and production trees	Ambio	Because of the limited spatial extent and comprehensiveness of protected areas, an increasing emphasis is being placed on conserving habitats which promote biodiversity within production forest. For this reason, alternative silvicultural programs need to be evaluated with respect to their implications for forest biodiversity, especially if these programs are likely to be adopted. Here we simulate…	2017	46	3	324-334
19083	Feng, Z., Brumme, R., Xu, Y. J. and Lamersdorf, N.	Tracing the fate of mineral N compounds under high ambient N deposition in a Norway spruce forest at Solling/Germany	Forest Ecology and Management	The fate of high and equally distributed ammonium and nitrate deposition was followed in a 72-year-old roofed Norway spruce forest at Solling in central Germany by separately adding (15)NH(4)(+) and (15)NO(3)(-) to throughfall water since November 2001. The objective was to quantify the retention of atmospheric ammonium and nitrate in different ecosystem compartments as well as the leaching loss …	2008	255	7	2061-2073
19084	Fenn, Mark E., Ross, Christopher S., Schilling, Susan L., Baccus, William D., Larrabee, Michael A. and Lofgren, Rebecca A.	Atmospheric deposition of nitrogen and sulfur and preferential canopy consumption of nitrate in forests of the Pacific Northwest, USA	Forest Ecology and Management	Wet, dry and throughfall deposition of N and S were measured for 2 years in three national parks in Washington State: Olympic, Mount Rainier, and North Cascades. Throughfall was measured using ion exchange resin (IER) collectors. A major objective of the study was to evaluate the effectiveness of IER throughfall measurements for monitoring deposition inputs, including cloudwater deposition, to fo…	2013	302		240-253
19085	Ferrier, R. C., Anderson, H. A., Miller, J. D., Walker, T. A. B. and Christophersen, N.	HYDROCHEMICAL PROCESSES AT A PRISTINE SITE IN NORD-TRONDELAG, MID-NORWAY	Water Air and Soil Pollution	A detailed study of hydrochemical processes associated with vegetation and soils was undertaken at a pristine site in mid-Norway. Inputs to the site during snow-free periods showed a marked seasonality with excess sulphate concentrations in rainfall only during the summer months. However, this represented a small fraction of total annual loading and there was a dominant influence of sea salt depo…	1992	62	2019-03-04	281-302
19086	Fiedler, F.	The ecological measurement area of the Forestry Department of Dresden Technical University. 10. Characterization of factors affecting yield after the establishment of different degrees of stocking	Wissenschaftliche Zeitschrift der Technischen Universitat Dresden	Details are given of the basal area and volume on plots in a 95-year-old Norway spruce [Picea abies] stand at Tharandt (E. Germany) where the initial stocking density of 0.8 was either retained, or was reduced to 0.6 and then 0.4 in two stages in 1984 and 1988. This gave basal area values of 41.0, 30.2 and 22.7 m/ha, respectively. Yield studies and various interdisciplinary investigations will be…	1990	39	6	145-148
19087	Filimonova, V. D.	The condition of flooded Scots pine stands in the zone affected hydrologically by the Volga-Baltic canal	Lesovedenie	The Volga-Baltic canal is one of the waterways that is involved in the Soviet schemes to divert some of the water from the north-flowing rivers into the more southerly regions of the USSR. These schemes involve flooding and a rise in the water table in extensive forest areas, and data are tabulated on the site conditions and mensurational characteristics of the stands in a number of areas affecte…	1980		1	76-80
19088	Finnegan, J., Regan, J. T., O'Connor, M., Wilson, P. and Healy, M. G.	Implications of applied best management practice for peatland forest harvesting	Ecological Engineering	Elevated levels of nutrients and suspended sediment (SS), and changes to other environmental parameters, are frequently associated with forestry harvesting (clearfelling) operations, and are indicative of the potentially complex changing environment associated with clearfelling. Current and future recommended best management practices (BMPs) for forestry clearfelling on upland peat catchments mus…	2014	63		2019-12-26
19089	Flejzor, L. and International Tropical Timber, Organization	Tropical Timber Market Report, 1-15 September 2007	Tropical Timber Market Report	Indonesian and Malaysian markets were rather quiet due to the effects of the U.S. subprime mortgage and housing fallout. At the same time, some owners of timber products companies had been trying to shore up prices of their company's stocks in the media. Prices were generally flat or slightly down for more expensive species and products in both countries. In Latin America, Brazilian furniture pro…	2007	12	17	14 pp.-14 pp.
19090	Flyborg, Lena, Bjorlenius, Berndt and Persson, Kenneth M.	Can treated municipal wastewater be reused after ozonation and nanofiltration? Results from a pilot study of pharmaceutical removal in Henriksdal WWTP, Sweden	Water Science and Technology	The objective of this study was to evaluate the potential of nanofiltration (NF) and ozonation for indirect potable reuse in terms of pharmaceutical residuals. To simultaneously obtain a reasonable retentate volume for further treatment, the tests were performed at a high volume reduction factor (VRF) of 60. The feed to the pilot plant was the effluent from a BNR plant with a final process step o…	2010	61	5	1113-1120
19091	Folkeson, L. and Anderssonbringmark, E.	IMPOVERISHMENT OF VEGETATION IN A CONIFEROUS FOREST POLLUTED BY COPPER AND ZINC	Canadian Journal of Botany-Revue Canadienne De Botanique		1988	66	3	417-428
19092	Folkesson, B. and Barring, U.	Some examples of the influence of an abundant occurrence of birch on the development of young Norway spruce and Scots pine stands in North Sweden	Report, Division of Forest Herbology, Swedish University of Agricultural Sciences	Results are given from 5 experimental plots, on three of which birch (mainly Betula pubescens) was controlled some years after the establishment of Norway spruce (Picea abies) and Scots pine (Pinus sylvestris); on plot 4 spruce and pine were planted after the existing birch stand had been treated in different ways; plot 5 was a forest plantation that had been partially sprayed with herbicides. Th…	1982		Nr. 1	64 + 22 pp.-64 + 22 pp.
19093	Folster, J.	The near-stream zone is a source of nitrogen in a Swedish forested catchment	Journal of Environmental Quality	Most Swedish forests efficiently retain N from deposition and run-off N can be expected to originate from the near-stream zone. Nitrogen leaching from this region is low, but still may be of ecological relevance (e.g., in oligotrophic lakes). In the present study the function of the near-stream zone with respect to N chemistry in stream water of a small pristine catchment in central-south Sweden …	2000	29	3	883-893
19094	Forsius, M., Kleemola, S., Starr, M. and Ruohoairola, T.	ION MASS BUDGETS FOR SMALL FORESTED CATCHMENTS IN FINLAND	Water Air and Soil Pollution	Ion mass and H+ budgets were calculated for three pristine forested catchments using bulk deposition, throughfall and runoff data. The catchments have different soil and forest type characteristics, A forest canopy filtering factor for each catchment was estimated for base cations, H+, Cl- and SO42- by taking into account the specific filtering abilities of different stands based on the throughfa…	1995	79	2019-01-04	19-38
19095	Forsius, Martin, Raike, Antti, Huttunen, Inese, Poutanen, Heikki, Mattsson, Tuija, Kankaanpaa, Susanna, Kortelainen, Pirkko and Vuorilehto, Veli-Pekka	Observed and predicted future changes of total organic carbon in the lake Paijanne catchment (southern Finland): Implications for water treatment of the Helsinki metropolitan area	Boreal Environment Research	Lake Paijanne (1083 km(2)) is the main drinking-water source for more than one million people of the Helsinki metropolitan area and the lake is important also for fisheries and recreation. We carried out a detailed study on observed and modelled future changes of total organic carbon (TOC) in this large lake catchment (26 459 km(2)), and assessed the implications for current water treatment proce…	2017	22		317-336
19096	Forsman, Mona, Borlin, Niclas and Holmgren, Johan	Estimation of Tree Stem Attributes Using Terrestrial Photogrammetry with a Camera Rig	Forests	We propose a novel photogrammetric method for field plot inventory, designed for simplicity and time efficiency on-site. A prototype multi-camera rig was used to acquire images from field plot centers in multiple directions. The acquisition time on-site was less than two minutes. From each view, a point cloud was generated using a novel, rig-based matching of detected SIFT keypoints. Stems were d…	2016	7	3
19097	Forss, Jorgen and Welander, Ulrika	Biodegradation of azo and anthraquinone dyes in continuous systems	International Biodeterioration & Biodegradation	The purpose is to develop a complete microbiological model system for the treatment of wastewater from textile mills in developing countries. Artificial wastewater was treated by microorganisms growing on wood shavings from Norway spruce during unsterile conditions. The microorganisms were inoculated from forest residues. Mixtures of the azo dyes Reactive Black 5 and Reactive Red 2 were degraded …	2011	65	1	227-237
19098	Forsslund, K. H.	Summary statement of the animals found during soil-fauna investigations in Vasterbotten	Meddelanden fran Statens Skogsforsoksanstalt	A systematic catalogue giving the geographical range of each species, N. Swedish forest types in which it occurs and, where known, data on frequency, constancy and abundance in samples taken with Tragardh's sampling funnel, and occurrence in different soil layers. It is proposed that the term 'zootope' should be employed for the environment of the zoocoenosis, retaining 'biotope' for that of the …	1944	34		341-64
19099	Fossestol, K. O. and Sverdrup-Thygeson, A.	Saproxylic beetles in high stumps and residual downed wood on clear-cuts and in forest edges	Scandinavian Journal of Forest Research	This study evaluates how the placement and the different possible outcomes of a spruce retention tree affected species richness and assemblages of spruce-associated saproxylic beetles. In a field experiment in the boreal zone of central Norway, high stumps were created and compared with residual wood pieces (i.e. top boles with branches), in clear-cuts versus in forest edges. Flight interception …	2009	24	5	403-416
19100	Fossestol, Knut Olav and Sverdrup-Thygeson, Anne	Saproxylic beetles in high stumps and residual downed wood on clear-cuts and in forest edges	Scandinavian Journal of Forest Research	This study evaluates how the placement and the different possible outcomes of a spruce retention tree affected species richness and assemblages of spruce-associated saproxylic beetles. In a field experiment in the boreal zone of central Norway, high stumps were created and compared with residual wood pieces (i.e. top boles with branches), in clear-cuts versus in forest edges. Flight interception …	2009	24	5	403-416
19101	Franc, Niklas	Standing or downed dead trees - does it matter for saproxylic beetles in temperate oak-rich forest?	Canadian Journal of Forest Research	For conservation of forest biodiversity, dead wood in the form of logs, snags, or cut high stumps is sometimes left or created when forests are harvested. In Scandinavia, such dead wood usually comes from conifers. For forests in temperate regions, few studies have analysed composition and species richness of beetles using dead wood of oaks (Quercus spp). In this study in southern Sweden, I exami…	2007	37	12	2494-2507
19102	Franc, Niklas and Gotmark, Frank	Openness in management: Hands-off vs partial cutting in conservation forests, and the response of beetles	Biological Conservation	The appropriate management of forest reserves is debated; two major alternatives are succession to 'wild' state, or management to produce semi-open stands. For temperate conservation stands, there are no strong experiments replicated at landscape level. In each of 22 forests rich in oaks (Quercus spp.) in Sweden, we set up a closed-canopy wild plot (1 ha), and a cutting plot (1 ha) to produce sem…	2008	141	9	2310-2321
19103	Frandsen, Mette, Nilsson, Bertel, Engesgaard, Peter and Pedersen, Ole	Groundwater seepage stimulates the growth of aquatic macrophytes	Freshwater Biology	1. The impact of groundwater seepage on the growth of submerged macrophytes was investigated in experiments on the isoetid Littorella uniflora and the elodeid Myriophyllum alterniflorum both in the laboratory and in the field. Isoetids rely mostly on sediment-derived CO2 and nutrients via root uptake, whereas elodeids acquire their inorganic carbon and nutrients from the water column. We thus hyp…	2012	57	5	907-921
19104	Frank, J. and Stuanes, A. O.	Short-term effects of liming and vitality fertilization on forest soil and nutrient leaching in a Scots pine ecosystem in Norway	Forest Ecology and Management	The effects of liming and vitality fertilization on soil acidity, base cations and nutrient leaching were examined after four growing seasons in a Scots pine ecosystem in southern Norway. A randomized block field experiment was established in 1992 on a sandy, well drained, fluvial plain with a weakly podzolized soil (Cambic Arenosol). The Scots pine (Pinus sylvestris L.) stand was by then 33 year…	2003	176	2019-01-03	371-386
19105	Franklin, O., Hogberg, P., Ekblad, A. and Agren, G. I.	Pine forest floor carbon accumulation in response to N and PK additions: Bomb C-14 modelling and respiration studies	Ecosystems	The addition of nitrogen via deposition alters the carbon balance of temperate forest ecosystems by affecting both production and decomposition rates. The effects of 20 years of nitrogen (N) and phosphorus and potassium (PK) additions were studied in a 40-year-old pine stand in northern Sweden. Carbon fluxes of the forest floor were reconstructed using a combination of data on soil C-14, tree gro…	2003	6	7	644-658
19106	Fransson, A. M. and Bergkvist, B.	Phosphorus fertilisation causes durable enhancement of phosphorus concentrations in forest soil	Forest Ecology and Management	The duration of P fertiliser in acid forest soil was investigated in a Norway spruce (Picea abies Karst.) forest in southcentral Sweden. The fertilisation of the soil started in 1967, but no P has been applied since 1988. The N fertilisation is still continuing. Totally, 300 kg P per hectare, as superphosphate, and/or 1090 kg N per hectare, as ammonium nitrate, was applied. Concentrations of both…	2000	130	2019-01-03	69-76
19107	Fredlund, K., Bergman, E. L., Rossander-Hulthen, L., Isaksson, M., Almgren, A. and Sandberg, A. S.	Hydrothermal treatment and malting of barley improved zinc absorption but not calcium absorption in humans	European Journal of Clinical Nutrition	Objective: To study whether hydrothermal treatment or malting of barley (cv. Blenheim) improves zinc and calcium absorption in humans. Design: Two groups of 10 and 12 healthy subjects, respectively, were in a period of 2 months in a fasting state, served two single meals each containing porridge or breakfast cereals prepared from processed or unprocessed (control) barley (60 g). The meals include…	2003	57	12	1507-1513
19108	Freiesleben, N. E. von	Sulfate mobility in an acid Danish forest soil	Journal of Environmental Quality	A key question in the acidification of soils due to atmospheric deposition of strong acids is the accumulation of SO42- in the soil. Sulfate leaching was studied in the laboratory in undisturbed soil cores taken in a Typic Udipsamment under spruce forest. The soil cores were watered with natural throughfall water (pH 3.6) or with throughfall acidified to pH 3.3 or 2.8 with a mixture of sulfuric a…	1988	17	2	278-284
19109	Freiesleben, N. E. van and Rasmussen, L.	Effects of acid rain on ion leaching in a Danish forest soil	Water, Air, and Soil Pollution	The mobility of major cations (H+, ammonium, Al, Ca, Na, Mg, K, Fe), heavy metals (Mn, Zn, Ni, Cd) and anions (chloride, sulphate and nitrate) was studied in the laboratory in an acidified brown soil from a Norway spruce forest. Lysimeters containing undisturbed soil columns of the A-horizon and the A- plus B-horizon were watered with 540 mm of throughfall precipitation collected in situ, either …	1986	31	2019-03-04	965-968
19110	Freppaz, Michele, Williams, Berwyn L., Edwards, Anthony C., Scalenghe, Riccardo and Zanini, Ermanno	Labile nitrogen, carbon, and phosphorus pools and nitrogen mineralization and immobilization rates at low temperatures in seasonally snow-covered soils	Biology and Fertility of Soils	Surface mineral horizons from four ecosystems sampled in the northwestern Italian Alps were incubated at -3 and +3 degrees C to simulate subnivial and early thaw period temperatures for a seasonally snow-covered area. The soil profiles at these sites represent extreme examples of management, grazed meadow (site M) and extensive grazing beneath larch (site L) or naturally disturbed by avalanche an…	2007	43	5	519-529
19111	Frey, J., Frey, T. and Pajuste, K.	Input-output analysis of macroelements in ICP-IM catchment area, Estonia	Landscape and Urban Planning	Using bulk deposition, throughfall, stemflow, soil infiltration, runoff water, litterfall data, ion mass budgets were calculated for a catchment area and for mature spruce and pine stands on it. The ions considered in mass balances were Na+, K+, Cat(2+), Mg2+, SO42-, NO3-, NH4+, HCO3-, and H+. Corresponding fluxes for the budgets were calculated as an average for 6 years of studies (1995-2000). A…	2004	67	2019-01-04	217-223
19112	Fritz, Orjan and Heilmann-Clausen, Jacob	Rot holes create key microhabitats for epiphytic lichens and bryophytes on beech (Fagus sylvatica)	Biological Conservation	Identification of trees with key microhabitats as well as knowledge of their ecological formation is important for the conservation of epiphytic bryophytes and lichens on beech Based on the hypothesis that certain types of stem damage are crucial for the occurrence of epiphytes of conservation concern, we surveyed 145 beech trees (57-280 years) for different types of stem damage and analysed thei…	2010	143	4	1008-1016
19113	Froberg, Mats, Hansson, Karna, Kleja, Dan Berggren and Alavi, Ghasem	Dissolved organic carbon and nitrogen leaching from Scots pine, Norway spruce and silver birch stands in southern Sweden	Forest Ecology and Management	The effects of three common tree species - Scots pine, Norway spruce and silver birch - on leaching of dissolved organic carbon and dissolved nitrogen were studied in an experimental forest with podzolised soils in southern Sweden. We analyzed soil water collected with lysimeters and modeled water fluxes to estimate dissolved C and N fluxes. Specific UV absorbance (SUVA) was analyzed to get infor…	2011	262	9	1742-1747
19114	Frostell, B., Boman, B., Ek, M., Palvall, B., Berglund, M. and Lindstrom, A.	INFLUENCE OF BLEACHING CONDITIONS AND MEMBRANE FILTRATION ON PILOT-SCALE BIOLOGICAL TREATMENT OF KRAFT MILL BLEACH PLANT EFFLUENT	Water Science and Technology	A kraft mill bleach plant effluent was treated in a pilot station with a common pretreatment stage and three parallel biological treatment plants. The possibility to membrane filter the E-stage effluent before biological treatment was provided. In the first pilot plant, three 0.7 m3 anaerobic fixed film reactors were followed by an activated sludge plant with two 0.7 m3 aerobic tanks in series. T…	1994	29	2019-05-06	163-176
19115	Gagen, M., McCarroll, D., Jalkanen, R., Loader, N. J., Robertson, I. and Young, G. H. F.	A rapid method for the production of robust millennial length stable isotope tree ring series for climate reconstruction	Global and Planetary Change	We developed a millennial length tree ring delta C-13 chronology from Pinus sylvestris at a site known as Laanila, in northern Finnish Lapland. In order to measure this series rapidly and with adequate replication, we adapted a multiple year pooling system. Using a combination of offset cut 5-year blocks, plus a novel method of joining tree cohorts together without the loss of a reliable absolute…	2012	82-83		96-103
19116	Gagen, Mary, McCarroll, Danny, Loader, Nell J., Robertson, Lain, Jalkanen, Risto and Anchukaitis, Kevin J.	Exorcising the 'segment length curse': Summer temperature reconstruction since AD 1640 using non-detrended stable carbon isotope ratios from pine trees in northern Finland	Holocene	Stable carbon isotope ratios from the latewood cellulose of 12 trees from two sites in northern Finland are used to construct an isotope chronology covering AD 1640 to 2002. By measuring isotopic ratios of every sample independently it is possible to identify and remove the juvenile portion of each delta C-13 series, correct the individual series for anthropoggenic changes in atmospheric carbon d…	2007	17	4	435-446
19117	Gaige, E., Dail, D. B., Hollinger, D. Y., Davidson, E. A., Fernandez, I. J., Sievering, H., White, A. and Halteman, W.	Changes in canopy processes following whole-forest canopy nitrogen fertilization of a mature spruce-hemlock forest	Ecosystems	Most experimental additions of nitrogen to forest ecosystems apply the N to the forest floor, bypassing important processes taking place in the canopy, including canopy retention of N and/or conversion of N from one form to another. To quantify these processes, we carried out a large-scale experiment and determined the fate of nitrogen applied directly to a mature coniferous forest canopy in cent…	2007	10	7	1133-1147
19118	Gao, Qiuju, Blum, Kristin M., Gago-Ferrero, Pablo, Wiberg, Karin, Ahrens, Lutz and Andersson, Patrik L.	Impact of on-site wastewater infiltration systems on organic contaminants in groundwater and recipient waters	Science of the Total Environment	On-site sewage treatment facilities, particularly septic systems combined with soil infiltration, can be an important source of emerging organic contaminants in groundwater and surface water and thus represent a significant source of environmental and human exposure. Two infiltration systems in Are municipality, Sweden, were examined to assess the occurrence of contaminants in groundwater and the…	2019	651		1670-1679
19119	Garcia-Rodeja, E., Novoa, J. C., Pontevedra, X., Martinez-Cortizas, A. and Buurman, P.	Aluminium fractionation of European volcanic soils by selective dissolution techniques	Catena	Several selective dissolution methods were used to differentiate Al forms in 12 soils formed from volcanic materials (64 andic, vitric and organic horizons) in Iceland, Azores (Portugal), Tenerife (Spain) and Italy. The soils differ in many properties because of differences in parent materials, climatic conditions, soil age and history of land use. 'Inorganic' fractions of Al were characterized u…	2004	56	2019-01-03	155-183
19120	Gasiunas, Valerijus and Lysoviene, Jelena	Nutrient retention efficiency of small regulated streams during the season of low-flow regime in Central Lithuanian lowland	Hydrology Research	Small streams are polluted with nutrients when crude or partially treated wastewater flows from settlements. The aim of the study was to determine the efficiency of small streams to self-purify themselves of nutrients during the season of low-flow regime. The study was carried out in five regulated streams with catchments of up to 30 km(2) in the Central Lithuanian lowland. The retention of nitro…	2014	45	3	357-367
19121	Gates, Genevieve M., Mohammed, Caroline, Wardlaw, Tim, Ratkowsky, David A. and Davidson, Neil J.	The ecology and diversity of wood-inhabiting macrofungi in a native Eucalyptus obliqua forest of southern Tasmania, Australia	Fungal Ecology	The ecology and diversity of the macrofungal species assemblages associated with woody material in four plots with differing wildfire histories in a Tasmanian tall, wet, native Eucalyptus obliqua forest were investigated. The four woody substrata (CWD, other dead wood ODW, stags and living trees) supported substantially different macrofungal assemblages, although there was some degree of overlap …	2011	4	1	56-67
19122	Gelfan, A., Motovilov, Yu, Krylenko, I., Moreido, V. and Zakharova, E.	Testing the robustness of the physically-based ECOMAG model with respect to changing conditions	Hydrological Sciences Journal-Journal Des Sciences Hydrologiques	The robustness of the physically-based, semi-distributed hydrological model ECOMAG with respect to changing (climatic or land-use) conditions was evaluated for two basins, considered within the modelling workshop held in the frame of the 2013 IAHS conference in Goteborg, Sweden. The first basin, the Garonne River basin, France, is characterized mostly by changes in climatic conditions, while the …	2015	60	2019-07-08	1266-1285
19123	Gerra-Inohosa, L., Puspure, I. and Bambe, B.	Epiphytic bryophyte and lichen species diversity on retained trees in young forest stands	Mezzinatne	In the recent years a common forest management practice has been to leave a certain number of living trees in clear-cuts. The so-called retention trees may ensure survival of epiphytic bryophytes and lichens after tree harvest. In this study, the goal was to determine the occurrence of epiphytic species on retention living trees in young forest stands that had developed on clearcuts. We also exam…	2015		29	35-57
19124	Gielis, L., De Schrijver, A., Wuyts, K., Staelens, J., Vandenbruwane, J. and Verheyen, K.	Nutrient cycling in two continuous cover scenarios for forest conversion of pine plantations on sandy soil. II. Nutrient cycling via throughfall deposition and seepage flux	Canadian Journal of Forest Research-Revue Canadienne De Recherche Forestiere	This study examined ion throughfall deposition and seepage fluxes in silver birch (Betula pendula L.) and Scots pine (Pinus sylvestris L.) regenerations a decade after a forest conversion intervention in two continuous cover scenarios (shelterwood cut versus group cut), as well as a 70-year-old control stand of Scots pine. Ion throughfall deposition was significantly influenced by the conversion …	2009	39	2	453-466
19125	Giesler, R., Andersson, T., Lovgren, L. and Persson, P.	Phosphate sorption in aluminum- and iron-rich humus soils	Soil Science Society of America Journal	Groundwater discharge areas in boreal forest ecosystems can potentially be areas where Fe and Al accumulate in the forest floor and affect the solubility of P. This study was conducted to determine phosphate sorption properties using humus soils containing high native amounts of Al and Fe. Humus soils were collected from two different forested groundwater discharge areas varying in pH and amount …	2005	69	1	77-86
19126	Giesler, R., Moldan, F., Lundstrom, U. and Hultberg, H.	Reversing acidification in a forested catchment in southwestern Sweden: Effects on soil solution chemistry	Journal of Environmental Quality	The exclusion of acid precipitation in whole-catchment experiments can provide valuable information to further our understanding of recovery processes of acidified soils. In this study, we focused on the reversibility of acidification-induce changes in different soil horizons when anthropogenic deposition was excluded. A small forested catchment in the Gardsjon area in southwest Sweden was covere…	1996	25	1	110-119
19127	Giesler, R., Petersson, T. and Hogberg, P.	Phosphorus limitation in boreal forests: Effects of aluminum and iron accumulation in the humus layer	Ecosystems	Plant growth in boreal forests is generally considered to be predominantly nitrogen (N) limited, but forested groundwater discharge areas may be exceptions. in this study, we conducted tests to determine whether highly productive forested groundwater discharge areas generally differ from adjacent groundwater recharge areas in terms of humus chemistry and the availability of phosphorus (P) and N t…	2002	5	3	300-314
19128	Giesler, R., Satoh, F., Ilstedt, U. and Nordgren, A.	Microbially available phosphorus in boreal forests: Effects of aluminum and iron accumulation in the humus layer	Ecosystems	Soil microorganisms play an important role in the mobilization of phosphorus (P), and these activities may be beneficial for plant P utilization. We investigated the effects on microbial P availability of different combinations of aluminum and iron (Al + Fe) concentrations and different P pools in humus soils from boreal forest ecosystems. We measured respiration rates in laboratory incubations b…	2004	7	2	208-217
19129	Gimingham, C. H., Pritchard, N. M. and Cormack, R. M.	INTERPRETATION OF A VEGETATIONAL MOSAIC ON LIMESTONE IN ISLAND OF GOTLAND	Journal of Ecology		1966	54	2	481-+
19130	Gipiskis, V.	Flooding duration, meadow resowing and fertilizing investigation in the peat soils of flood land of Minija	Zemdirbyste, Mokslo Darbai	Hydrological-agronomic investigations were carried out in the meadows growing in abandoned, infertile flooded peat soils of Minija in Silute district (Lithuania) during 1995-2004. Field trials were conducted under different hydrological conditions and altitudinal gradients (-0.05, 0.15 and 0.33 m above sea level). Flood duration, including winter time was 130, 115 and 100 days. Summer-type polder…	2005	92		136-149
19131	Gjengedal, E.	Effects of soil acidification on foliar leaching and retranslocation of metals in vascular plants	Water Air and Soil Pollution	This paper reports on the seasonal patterns in leaf metal concentrations as influenced by artificial acidification and acidification due to acid precipitation at ambient levels in Southern Norway. The effects of change in soil nutrient availability can be concealed for a long time because of ability of plants to retranslocate mobile nutrients including Cu, Mg, K, and Zn. Exceptions are, e.g., Ca …	1996	86	2019-01-04	221-234
19132	Gjerde, Ivar, Saetersdal, Mayne and Blom, Hans H.	Complementary Hotspot Inventory - A method for identification of important areas for biodiversity at the forest stand level	Biological Conservation	Forest stands are the basic planning units of managed forest landscapes, and the structural composition of these units is important for conservation of biodiversity. We present a methodological approach for identification and mapping of important structural and environmental features of forest stands. Based on an analysis of habitats of red-listed species and a synthesis of results from research …	2007	137	4	549-557
19133	Glasser, E. and Hovstad, H.	The problem of hill farming in Norway. The examples of Fordal (Forbygda) and Budal (S<o>r-Tr<o>ndelag)	Erdkunde	The problems facing hill farming are considered against a background of the strategies of Norwegian agricultural policy. Possibilities are also explored of how far to keep in existence at least parts of the area under investigation without subsidies of the present order of magnitude. The results of the investigation are mostly based on enquiries in the field and on specialized data from the agric…	1989	43	1	2019-01-16
19134	Glatzel, G., Haselwandter, K., Katzensteiner, K., Sterba, H. and Weissbacher, J.	THE USE OF ORGANIC AND MINERAL FERTILIZERS IN REFORESTATION AND IN REVITALIZATION OF DECLINING PROTECTIVE FORESTS IN THE ALPS	Water Air and Soil Pollution	BIOSOL1 and BACTOSOL1, organic fertilizers based on residue from commercial antibiotic production, were tested as an alternative to mineral fertilizers in reforestation and in revitalization of Norway spruce stands (Picea abies) affected by forest decline. Due to its slow release of N and its stimulation of root growth, the organic fertilizer was superior to mineral fertilizer in enhancing growth…	1990	54		567-576
19135	Gobran, G. R. and Nilsson, S. I.	EFFECTS OF FOREST FLOOR LEACHATE ON SULFATE RETENTION IN A SPODOSOL SOIL	Journal of Environmental Quality		1988	17	2	235-239
19136	Gobran, G. R., Selim, H. M., Hultberg, H. and Andersson, I.	Sulfate adsorption-desorption in a Swedish forest soil	Water Air and Soil Pollution	The Forest Roof project at Lake Gardsjon located on the Swedish Southwest coast near Gothenburg was established to assess the response of the ecosystem following a major reduction in loading of sulfur acidic deposition. The objective of the study was to describe the adsorption-desorption processes of sulfate in Haplorthod soils at the Gardsjon site. A sequential batch technique was used to sequen…	1998	108	2019-03-04	411-424
19137	Godnev, T. N. and Sabel'Skaja, E. F.	The effect of prolonged darkness on the pigments and plastid apparatus of some sun and shade plants	Fiziologiya Rastenii	The pigments of most of the plant species investigated were found to be stable during prolonged periods of darkness. The species, in descending order of pigment stability, were: Picea excelsa, Pinus sylvestris, yew, Robinia pseudacacia, lily-of-the-valley, Philadelphus coronarius, sunflower, maize and potato. There appeared to be no significant correlation between pigment stability and the extent…	1967	14		451-5
19138	Golubets, M. A., Odinak, Ya P. and Panasyuk, M. V.	Water-retaining capacity of forests in the Beskidy Mts. and their foothills	Ukrains'kii Botanichnii Zhurnal	Branches of 7 tree species growing in the northern range of the Ukrainian Carpathians were cut and sprayed with water at a field test site to determine their max. interception. Moisture retention data were expressed per unit area of branches with or without leaves: Norway spruce branches without needles had a particularly high moisture-retaining capacity. Interception data were calculated for 14 …	1987	44	5	31-35
19139	Gomez-Guerrero, Armando, Chavez-Aguilar, Griselda, Fenn, Mark E., Vargas-Hernandez, Jesus and Horwath, William R.	Foliar nitrogen uptake in simulated wet deposition in Abies religiosa	Interciencia	To evaluate foliar absorption of inorganic nitrogen by simulated wet deposition in Abies religiosa, a greenhouse factorial experiment was established with three-year old seedlings using a randomized design. Eight treatments resulted from the combination of N form (NO3- or NH4+), dose (high or low) and runoff to the substrate (with and without). N-15 was used to evaluate N absorption. Plants were …	2008	33	6	429-434
19140	Gomoryova, E. and Gomory, D.	RELATIONSHIPS BETWEEN ENVIRONMENTAL-FACTORS AND HEIGHT GROWTH AND YIELD OF NORWAY SPRUCE STANDS - A FACTOR-ANALYTIC APPROACH	Forestry	Soil samples were taken from 148 experimental plots and subjected to analysis of 34 morphological, physical and chemical properties. At the same time, eight climatic and topographic characteristics were recorded. For each plot the values of top height and yield were available. The relationships between the soil properties and climatic/topographic characteristics were studied separately, for both …	1995	68	2	145-152
19141	Gongalsky, Konstantin B., Midtgaard, Fred and Overgaard, Hans J.	Effects of prescribed forest burning on carabid beetles (Coleoptera : Carabidae): a case study in south-eastern Norway	Entomologica Fennica	The influence of prescribed burning on ground beetles was studied in a single 12-ha stand that was partially clear-cut, selectively-cut and retained (= standing forest), and was compared to an unburned stand in 2002 in SE Norway. Thirty-two species were collected using Barber pitfall traps. Carabids were more numerous and more diverse in the burned area, compared to the unburned forest. Overall a…	2006	17	3	325-333
19142	Gonzalez-Pena, Marcos M. and Hale, Michael D. C.	Rapid assessment of physical properties and chemical composition of thermally modified wood by mid-infrared spectroscopy	Wood Science and Technology	Characterisation, quality assessment and property prediction are several of the major industrial challenges for widespread acceptance of thermally modified wood (TMW). This study shows the potential of the multivariate analysis of mid-infrared (MIR) spectral data for the prediction of impact strength, five mechanical parameters in bending, moisture content, weight loss, density and chemical compo…	2011	45	1	83-102
19143	Gorka, W.	Effect of different form and structure of protection stands on the formation of snow cover	Book Section	Snow accumulation was studied around 14 shelterbelts near Kutno, central Poland. Results showed that a dense band of shrubs and rows of Norway spruce [Picea abies] perpendicular to the prevailing wind gives best snow retention (>50%), followed by avenues of old trees with dense shrub understorey running diagonally to the wind, or similar avenues without shrubs perpendicular to the wind (25-50%), …	1988
19144	Gotmark, Frank	Careful partial harvesting in conservation stands and retention of large oaks favour oak regeneration	Biological Conservation	In Europe, many semi-open pasture woodlands with oaks (Quercus robur and Q. petraea) have been invaded by other trees. The management alternatives for such stands are often debated. Protection (i.e. no cutting) versus partial harvest to favour oak regeneration was studied in two matched plots in 25 forests in Sweden. A mast year produced on average 45,000 oak seedlings/ha in 2001. On average 26% …	2007	140	2019-03-04	349-358
19145	Gotmark, Frank, Fridman, Jonas and Kempe, Gran	Education and advice contribute to increased density of broadleaved conservation trees, but not saplings, in young forest in Sweden	Journal of Environmental Management	The effectiveness of different conservation policies is debated, but the policies are rarely evaluated quantitatively. A Voluntary or 'soft' policy based mainly on education provides information about ecosystems and effects of land use, to encourage conservation action. Swedish forestry relies mainly on soft policy, with Substantial resources for education and advice to more than 200,000 forest o…	2009	90	2	1081-1088
19146	Graae, B. J.	The role of epizoochorous seed dispersal of forest plant species in a fragmented landscape	Seed Science Research	A domestic dog was used in two experiments to elucidate the role of epizoochorous seed dispersal of forest plants. First, the dog was walked through forest vegetation at different times of year and its coat analysed for seeds retained within it. The seed content of the coat was compared to seed frequencies in the vegetation. Secondly, seeds of 11 plant species were placed in different positions o…	2002	12	2	113-120
19147	Gradowski, Tomasz, Sidders, Derek, Keddy, Tim, Lieffers, Victor J. and Landhausser, Simon M.	Effects of overstory retention and site preparation on growth of planted white spruce seedlings in deciduous and coniferous dominated boreal plains mixedwoods	Forest Ecology and Management	Survival and growth of planted white spruce was assessed under partial harvest treatments and different site preparation techniques in mixedwood forests of two compositions prior to logging: deciduous dominated (d-dom) - primarily comprised of mature trembling aspen (Populus tremuloides Michx.) and coniferous dominated (c-dom) - primarily comprised of mature white spruce (Picea glauca (Moench) Vo…	2008	255	11	3744-3749
19148	Grainger, G. D.	Provenance test selection at the provincial tree nursery	Tree Planters' Notes	Two-yr-old seedlings from 9 provenances of Picea pungens 22 provenances of P. abies and 28 provenances of Pinus sylvestris (from North America, Europe and Russia) were planted in May 1972 in Alberta. IN 1978-79 trees were rated for hardiness, form, and colour retention for shelterbelt and ornamental uses, and selected provenances replanted. Results indicated that trees from S. Finland and Sweden …	1981	32	2	16-18
19149	Granath, Gustaf, Kouki, Jari, Johnson, Samuel, Heikkala, Osmo, Rodriguez, Antonio and Strengbom, Joachim	Trade-offs in berry production and biodiversity under prescribed burning and retention regimes in boreal forests	Journal of Applied Ecology	1. Green tree retention and prescribed burning are the practices used to mitigate negative effects of boreal forestry. Beside their effects on biodiversity, these practices should also promote non-timber forest products (NTFPs). We assessed: (1) how prescribed burning and tree retention influence NTFPs by examining the production of bilberry, Vaccinium myrtillus and cowberry, Vaccinium vitis-idae…	2018	55	4	1658-1667
19150	Granath, Gustaf, Kouki, Jari, Johnson, Samuel, Heikkala, Osmo, Rodriguez, Antonio and Strengbom, Joachim	Data from: Trade-offs in berry production and biodiversity under prescribed burning and retention regimes in Boreal forests	Dryad		2018
19151	Granath, Gustaf, Kouki, Jari, Johnson, Samuel, Heikkala, Osmo, Rodriguez, Antonio and Strengbom, Joachim	Species richness of multiple species groups	Dryad	Species richness of pollinators, saproxylic beetles, bryophytes, vascular plants and lichens. Collected in experimental plots. See readme file for more info.	2018
19152	Granath, Gustaf, Kouki, Jari, Johnson, Samuel, Heikkala, Osmo, Rodriguez, Antonio and Strengbom, Joachim	Plant community data	Dryad	Plant community data (percent cover) from experimental plots. Ground living vascular plants, macrolichens and bryophytes (mosses and liverworts). Year 2000, 2003 and 2011. See README file for more information.	2018
19153	Granath, Gustaf, Kouki, Jari, Johnson, Samuel, Heikkala, Osmo, Rodriguez, Antonio and Strengbom, Joachim	Fruit production and plant cover for two Vaccinium species	Dryad	Fruit production and plant cover for Vaccinium myrtillus and Vaccinium vitis-idaea collected in experimental plots. See readme file for more info.	2018
19154	Granberg, G., Sundh, I., Svensson, B. H. and Nilsson, M.	Effects of temperature, and nitrogen and sulfur deposition, on methane emission from a boreal mire	Ecology	To evaluate the effects of increased air temperature in combination with increased deposition of N and/or S on methane emission. we have raised in situ the temperature and rates of deposition of N and S in a poor fen lawn area of a boreal mixed mire. The experiment was laid out in a factorial design, where the mean daily air temperature 0.3 In above the vegetation surface was increased (by 3.6 de…	2001	82	7	1982-1998
19155	Granhus, A. and Floistad, I. S.	Natural regeneration after scarification on medium site index (g14). Scarification	Book Section	This report summarizes a survey of natural regeneration on 99 clear-cuts of medium site productivity (site index class G14) within Romedal and Stange Commons, SE Norway. The primary reforestation objective was to achieve natural regeneration of spruce through seed supply from neighbour stands. The stands were scarified during 2001-2006, and the survey was carried out during June-October 2008. The…	2010
19156	Granstrom, A.	SEED VIABILITY OF 14 SPECIES DURING 5 YEARS OF STORAGE IN A FOREST SOIL	Journal of Ecology		1987	75	2	321-331
19157	Grebe, Steffen, Trotta, Andrea, Bajwa, Azfar A., Suorsa, Marjaana, Gollan, Peter J., Jansson, Stefan, Tikkanen, Mikko and Aro, Eva-Mari	The unique photosynthetic apparatus of Pinaceae: analysis of photosynthetic complexes in Picea abies	Journal of experimental botany	Pinaceae are the predominant photosynthetic species in boreal forests, but so far no detailed description of the protein components of the photosynthetic apparatus of these gymnosperms has been available. In this study we report a detailed characterization of the thylakoid photosynthetic machinery of Norway spruce (Picea abies (L.) Karst). We first customized a spruce thylakoid protein database f…	2019	70	12	3211-3225
19158	Griesser, Michael and Lagerberg, Sarah	Long-term effects of forest management on territory occupancy and breeding success of an open-nesting boreal bird species, the Siberian jay	Forest Ecology and Management	In large parts of the world forests are intensively managed, affecting stand structure and biodiversity. Since re-growth of trees can be slow and management cycles can span over 100 years, long-term longitudinal data are needed to assess the effects of forestry on organisms living in these habitats. Here, we draw upon 50 years of population data of an open-nesting, sedentary bird species, typical…	2012	271		58-64
19159	Griesser, Michael and Nystrand, Magdalena	Vigilance and predation of a forest-living bird species depend on large-scale habitat structure	Behavioral Ecology	Prey often use visual cues to detect predators, and consequently, many studies have assessed the effect of small-scale habitat structure on prey antipredator vigilance. This scale may be inappropriate to assess the link between habitat structure and vigilance, however, because visually hunting predators often detect prey from several hundred meters away. As a result, large-scale habitat structure…	2009	20	4	709-715
19160	Gron, A. H.	Rational plantation economics	Dansk Skovforeningens Tidsskrift	In connexion with the controversy on Beech establishment costs in Derunark [see For. Abstr. 10 (No. 1015)], Gron presents calculations to show that intensification of plantation work (increasing the initial planting density or the number of weedings etc.) is economically justifiable only within very narrow limits, whereas there is a wide economic scope for 'extensification'. For every extra Kr. 1…	1948	33	11	484-94
19161	Gronlund, Orjan, Di Fulvio, Fulvio, Bergstrom, Dan, Djupstrom, Line, Eliasson, Lars, Erlandsson, Emanuel, Forsell, Nicklas and Korosuo, Anu	Mapping of voluntary set-aside forests intended for nature conservation management in Sweden	Scandinavian Journal of Forest Research	In Sweden, an estimated 0.3-0.6 million hectares (1.2-2.4% of the entire Swedish forest area) of forests are voluntary set-asides for nature conservation management (NCM). Even though these areas are crucial in Swedish biodiversity conservation, no analysis has yet been carried out of their conservation values and spatial distribution. The aim of this study was to comprehensively describe areas i…	2019	34	2	133-144
19162	Grove, S. J.	The influence of forest management history on the integrity of the saproxylic beetle fauna in an Australian lowland tropical rainforest	Biological Conservation	Forest management in temperate and boreal regions is often based on a strong foundation of applied ecological research. Increasingly, this has allowed the needs of saproxylic (dead wood associated) insects to be addressed. However, there has been very little equivalent research in tropical forests, where saproxylic insect faunas are likely to be much richer and where forestry is usually subject t…	2002	104	2	149-171
19163	Gryz, Jakub, Lesinski, Grzegorz, Krauze-Gryz, Dagny and Stolarz, Przemyslaw	Woodland reserves within an urban agglomeration as important refuges for small mammals	Folia Forestalia Polonica Series A - Forestry	The aim of the study was to determine the species richness (S, Chao- 1 index) and diversity (Shannon-Wiener H' index, diversity profiles) of small mammal assemblages in woodland reserves in an urban agglomeration and to compare the similarity of assemblages (with the use of Ward's method) in terms of proportions of small mammals connected to the habitats of different level of naturalness. The wor…	2017	59	1	2019-03-13
19164	Guan, Mingfu, Sillanpaa, Nora and Koivusalo, Harri	Assessment of LID practices for restoring pre-development runoff regime in an urbanized catchment in southern Finland	Water Science and Technology	This study quantifies the effects of common stormwater management techniques on urban runoff generation. Simulated flow rates for different low impact development (LID) scenarios were compared with observed flow rates during different urban construction phases in a catchment (12.3 ha) that was developed from natural forest to a residential area over a monitoring period of 5 years. The Storm Water…	2015	71	10	1485-1491
19165	Guan, XiMing	Nutrient availability in forest soils: Rhizospheric and sequential leaching studies	Book	This thesis is based on 5 papers (included as an appendix) published in or submitted to various journals. A field study on rhizospheric processes which control plant growth, and a laboratory study using a sequential leaching technique to simulate leaching in the field, are reported. The studies were aimed at testing the hypotheses that organic matter plays a decisive role in controlling nutrient …	1997
19166	Guggenberger, G. and Zech, W.	RETENTION OF DISSOLVED ORGANIC-CARBON AND SULFATE IN AGGREGATED ACID FOREST SOILS	Journal of Environmental Quality	Adsorption of dissolved organic carbon (DOC) and sulfate was examined in mineral A and B horizons of aggregated acid forest soils from declining (Oberwarmensteinach) and healthy (Wulfersreuth) Norway spruce [Picae abies (L.) Karst.] stands in northeastern Bavaria, Germany. Adsorption studies were conducted in the laboratory on undisturbed, aggregated soil samples under nonequilibrium conditions u…	1992	21	4	643-653
19167	Guggenberger, G. and Zech, W.	DISSOLVED ORGANIC-CARBON CONTROL IN ACID FOREST SOILS OF THE FICHTELGEBIRGE (GERMANY) AS REVEALED BY DISTRIBUTION PATTERNS AND STRUCTURAL COMPOSITION ANALYSES	Geoderma	Dissolved organic carbon (DOC) was investigated in different compartments of three acid forest soils of the Fichtelgebirge (northeastern Bavaria, Germany) developed under Norway spruce stands. Soil acidification increases from Wulfersreuth (Wu) over Obenwarmensteinach (Ow) to Hohe Matzen (HM). In order to assess factors of DOC control, DOC concentrations and fluxes in the compartments were measur…	1993	59	2019-01-04	109-129
19168	Guillitte, O., Melin, J. and Wallberg, L.	BIOLOGICAL PATHWAYS OF RADIONUCLIDES ORIGINATING FROM THE CHERNOBYL FALLOUT IN A BOREAL FOREST ECOSYSTEM	Science of the Total Environment	In an attempt to understand the mechanisms governing the transfer and retention of radiocaesium in the understorey vegetation, 39 macromycetes species and 33 plants species, together with humus samples, were systematically collected from the undercover vegetation in a boreal coniferous forest. The results indicate that the main factors determining interspecific differences in contamination level …	1994	157	2019-01-03	207-215
19169	Gullberg, A., Olsson, M. and Tegelstrom, H.	Evolution in populations of Swedish sand lizards: genetic differentiation and loss of variability revealed by multilocus DNA fingerprinting	Journal of Evolutionary Biology	The Swedish sand lizard (Lacerta agilis) is a relict species from the period of warmth following the last glacial episode and has a fragmented distribution in central Sweden and a more continuous distribution in the southern part of the country. We used this model system of colonization-extinction for a study of genetic variability within and among Swedish populations from different parts of the …	1999	12	1	17-26
19170	Gundale, Michael J., From, Fredrik, Bach, Lisbet H. and Nordin, Annika	Anthropogenic nitrogen deposition in boreal forests has a minor impact on the global carbon cycle	Global Change Biology	It is proposed that increases in anthropogenic reactive nitrogen (N-r) deposition may cause temperate and boreal forests to sequester a globally significant quantity of carbon (C); however, long-term data from boreal forests describing how C sequestration responds to realistic levels of chronic N-r deposition are scarce. Using a long-term (14-year) stand-scale (0.1ha) N addition experiment (three…	2014	20	1	276-286
19171	Gundersen, P.	Effects of enhanced nitrogen deposition in a spruce forest at Klosterhede, Denmark, examined by moderate NH4NO3 addition	Forest Ecology and Management	The fate and effects of increased N deposition were investigated by experimental manipulation in a mature Norway spruce plantation at Klosterhede, western Denmark. The ambient N deposition was 15-20 kg Nha(-1)yr(-1). Addition of 35 kg Nha(-1)yr(-1) as ammonium nitrate to a 500-m(2) plot was carried out by handspraying monthly for 4 years. During the first year the spray was labeled with N-15. Tre…	1998	101	2019-01-03	251-268
19172	Gundersen, P. and Beier, C.	ALUMINUM SULFATE SOLUBILITY IN ACID FOREST SOILS IN DENMARK	Water Air and Soil Pollution		1988	39	2019-03-04	247-261
19173	Gundersen, P. and Rasmussen, L.	NITROGEN MOBILITY IN A NITROGEN LIMITED FOREST AT KLOSTERHEDE, DENMARK, EXAMINED BY NH4NO3 ADDITION	Forest Ecology and Management	The fate and effects of increased N deposition were investigated by experimental manipulation in a mature Norway spruce plantation at Klosterhede, western Denmark. Ambient N deposition was 23 kg N ha(-1) year(-1). Addition of 35 kg N ha(-1) year(-1) as ammonium nitrate to a 500 m(2) plot was carried out monthly by handspraying. The soil solution chemistry responded promptly to the nitrogen applic…	1995	71	2019-01-02	75-88
19174	Gundersen, Per, Sevel, Lisbeth, Christiansen, Jesper Riis, Vesterdal, Lars, Hansen, Karin and Bastrup-Birk, Annemarie	Do indicators of nitrogen retention and leaching differ between coniferous and broadleaved forests in Denmark?	Forest Ecology and Management	The area of broadleaved forests is projected to increase in Denmark as well as in the rest of Europe. However, studies of the N leaching response to elevated N deposition have focused on coniferous stands and considerable uncertainty still remains on whether broadleaved and coniferous forests respond differently to elevated N. We studied N input-output relations for eight stands intensively monit…	2009	258	7	1137-1146
19175	Gundersen, Vegard and Frivold, Lars Helge	Naturally dead and downed wood in Norwegian boreal forests: public preferences and the effect of information	Scandinavian Journal of Forest Research	This study investigated public aesthetic preferences regarding naturally occurring dead and downed wood in Norwegian boreal forests. In an Internet-based survey conducted in cooperation with a commercial polling company, 1082 respondents from south-eastern and middle Norway were asked to rate 24 photos of forest settings. All photos had been taken at a stand level in primary or lightly altered se…	2011	26	2	110-119
19176	Gunn, John S., Saah, David S., Fernholz, Kathryn and Ganz, David J.	Carbon Credit Eligibility under Area Regulation of Harvest Levels in Northern Minnesota	Forest Science	We evaluated the implications of area regulation of harvest on eligible carbon under both the Voluntary Carbon Standard (VCS) and the Chicago Climate Exchange (CCX) for public forest lands in north central Minnesota (89,840 ha total). We used data from the carbon submodel of the US Forest Service Forest Vegetation Simulator (Lake States variant) to evaluate changes in forest carbon stocks under d…	2011	57	6	470-478
19177	Gurmesa, Geshere Abdisa, Schmidt, Inger Kappel, Gundersen, Per and Vesterdal, Lars	Soil carbon accumulation and nitrogen retention traits of four tree species grown in common gardens	Forest Ecology and Management	Tree species effects on soil carbon (C) accumulation are uncertain, especially with respect to the mineral soil C, and the consistency of such effects across soil types is not known. The interaction between C accumulation and nitrogen (N) retention among common tree species has also been little explored. Effects of four tree species on soil C and N stocks and soil water nitrate concentration belo…	2013	309		47-57
19178	Gustafsson, J. P.	MODELING PH-DEPENDENT SULFATE ADSORPTION IN THE BS HORIZONS OF PODZOLIZED SOILS	Journal of Environmental Quality	A model was developed that predicted the pool of adsorbed SO4 in the Bs horizons of northern Scandinavia as a function of pH and the solution SO4 concentration, assuming that 2 H+ are consumed for every SO42- adsorbed. To accomplish this, a sequential leach procedure with acid MgSO4 was used which facilitated the determination of SO4 adsorption capacity and the characterization of the adsorption …	1995	24	5	882-888
19179	Gustafsson, J. P., Berggren, D., Simonsson, M., Zysset, M. and Mulder, J.	Aluminium solubility mechanisms in moderately acid Bs horizons of podzolized soils	European Journal of Soil Science	The processes controlling the retention and release of aluminium in acid forest soils are still subject to controversy, and therefore a universal hypothesis as to what mechanisms are operating has not been firmly established. By studying the Bs horizons of Swedish and Swiss podzolized soils, and by analysing data in the literature, we have found that aluminium hydroxide, and in some cases also po…	2001	52	4	655-665
19180	Gustafsson, J. P. and Jacks, G.	SULFUR STATUS IN SOME SWEDISH PODZOLS AS INFLUENCED BY ACIDIC DEPOSITION AND EXTRACTABLE ORGANIC-CARBON	Environmental Pollution	To evaluate the changes in sulphur pools in response to acidic deposition, two studies were made-one in southwest Sweden where podzolic B horizons originally sampled in 1951 were resampled in 1989. At the Norrliden site, northern Sweden, sulphur pools in control plots were compared to plots that had been subjected to H2SO4 application between 1971 and 1976. The results show that in southwest Swed…	1993	81	2	185-191
19181	Gustafsson, J. P. and Johnsson, L.	SELENIUM RETENTION IN THE ORGANIC-MATTER OF SWEDISH FOREST SOILS	Journal of Soil Science	Fractions of selenium present in the soil profiles of three Swedish podzols were analysed using a sequential extraction scheme to characterize Se distribution among the organic and inorganic fractions. The process by which selenite deposited from the atmosphere is retained in a podzolic profile rich in organic matter was studied in a column experiment. Selenium present in organic fractions accoun…	1992	43	3	461-472
19182	Gustafsson, Lena, Fedrowitz, Katja and Hazell, Per	Survival and vitality of a macrolichen 14 years after transplantation on aspen trees retained at clearcutting	Forest Ecology and Management	Industrial forestry has caused large biodiversity changes in European boreal forests. One recently introduced conservation measure in production forestry is retention of trees at clearcutting to benefit flora and fauna. Aspen Populus tremula is often retained for conservation purposes since it is a key tree species for biodiversity with many associated species, a number of which are red-listed. S…	2013	291		436-441
19183	Gustafsson, L., Fiskesjo, A., Hallingback, T., Ingelog, T. and Pettersson, B.	SEMINATURAL DECIDUOUS BROADLEAVED WOODS IN SOUTHERN SWEDEN - HABITAT FACTORS OF IMPORTANCE TO SOME BRYOPHYTE SPECIES	Biological Conservation	A number of bryophyte species presumed to prefer deciduous, broadleaved woodlands with a long continuity were recorded in 101 stands in southern Sweden with different history and in different successional stages. The species Antitrichia curtipendula, Herzogiella seligeri, Homalia trichomanoides, Neckera complanata, Porella platyphylla, Rhytidialdephus loreus and Ulota crispa were found in 10 stan…	1992	59	2019-02-03	175-181
19184	Gustafsson, L. and Hallingback, T.	BRYOPHYTE FLORA AND VEGETATION OF MANAGED AND VIRGIN CONIFEROUS FORESTS IN SOUTHWEST SWEDEN	Biological Conservation		1988	44	4	283-300
19185	Gustafsson, L. and Johansson, G.	Regional management for appropriate nature conservation: lessons from the certification pilot study in Korsnas	Resultat - SkogForsk	The Swedish forest company Korsnas, which owns 660 000 ha of forest land, has in connection with their FSC [Forest Stewardship Council] certification divided their land into a number of ecoregions. Within each of these, a gap analysis has been performed in which the present state of the forests has been compared with a presumed stage in a natural forest landscape. Substantial differences between …	1998		21	4 pp.-4 pp.
19186	Gustafsson, Lena, Kouki, Jari and Sverdrup-Thygeson, Anne	Tree retention as a conservation measure in clear-cut forests of northern Europe: a review of ecological consequences	Scandinavian Journal of Forest Research	Since the mid-1990s, it has been common practice to leave trees for biodiversity purposes when clear-cutting in Finland, Norway and Sweden, and regulations for such tree retention are today included in national legislation and certification standards. Peer-reviewed research publications on tree retention from studies performed in the three countries were analyzed and about 50 relevant biodiversit…	2010	25	4	295-308
19187	Gustafsson, Lena and Perhans, Karin	Biodiversity Conservation in Swedish Forests: Ways Forward for a 30-Year-Old Multi-Scaled Approach	Ambio	A multi-scaled model for biodiversity conservation in forests was introduced in Sweden 30 years ago, which makes it a pioneer example of an integrated ecosystem approach. Trees are set aside for biodiversity purposes at multiple scale levels varying from individual trees to areas of thousands of hectares, with landowner responsibility at the lowest level and with increasing state involvement at h…	2010	39	8	546-554
19188	Gustavsson, Malin, Karlsson, Susanne, Oeberg, Gunilla, Sanden, Per, Svensson, Teresia, Valinia, Salar, Thiry, Yves and Bastviken, David	Organic Matter Chlorination Rates in Different Boreal Soils: The Role of Soil Organic Matter Content	Environmental Science & Technology	Transformation of chloride (Cl-) to organic chlorine (Cl-org) occurs naturally in soil but it is poorly understood how and why transformation rates vary among environments. There are still few measurements of chlorination rates in soils, even though formation of Cl-org has been known for two decades. In the present study, we compare organic matter (OM) chlorination rates, measured by Cl-36 tracer…	2012	46	3	1504-1510
19189	Haapala, A. and Muotka, T.	Seasonal dynamics of detritus and associated macroinvertebrates in a channelized boreal stream	Archiv Fur Hydrobiologie	This study documents various components of detritus dynamics in a channelized third order stream in Central Finland. Total annual litterfall entering the stream was 310 g AFDM m(-2). Leaf fall, which comprised 86.7% of total input, exhibited a distinct seasonal peak in September-October, with a maximum daily input rate of 13 g m(-2). The contribution of woody detritus to total input was only 5%. …	1998	142	2	171-189
19190	Haberle, S.	The shortage of timber raw material in relation to the negative correlation between size and processing costs	Forstarchiv	Forest residues in W. Germany, including whole stems from tendings at the thicket stage, small timber from thinnings, and slash from clear fellings, are analysed in terms of predicted annual quantity/ha (V, 0.9 t DM) and costs of preparation. Demand for residues by forest products industries, estimated at 3-4% of V, is limited by economic and quality problems; main interest would be in whole stem…	1980	51	10	202-206
19191	Hagg, H. Eriksson, Humborg, C., Swaney, D. P. and Morth, C. M.	Riverine nitrogen export in Swedish catchments dominated by atmospheric inputs	Biogeochemistry	We present the first estimates of net anthropogenic nitrogen input (NANI) in European boreal catchments. In Swedish catchments, nitrogen (N) deposition is a major N input (31-94%). Hence, we used two different N deposition inputs to calculate NANI for 36 major Swedish catchments. The relationship between riverine N export and NANI was strongest when using only oxidized deposition (NOy) as atmosph…	2012	111	2019-01-03	203-217
19192	Haggman, H. M., Ryynanen, L. A., Aronen, T. S. and Krajnakova, J.	Cryopreservation of embryogenic cultures of Scots pine	Plant Cell Tissue and Organ Culture	The aim of the study was to develop an effective cryopreservation method for Scots pine (Pinus sylvestris L.) embryogenic cultures. Altogether nine cell lines derived from three mother trees were cryopreserved after cold hardening using dimethylsulfoxide or two different mixtures of polyethyleneglycol 6000, glucose and dimethylsulfoxide as cryoprotectants. Seventy-eight percent of the cell lines …	1998	54	1	45-53
19193	Hagstrom-Nasi, C.	Forest cluster renewal demands a forward-looking, multidisciplinary approach	Paperi Ja Puu-Paper and Timber	The forest industry enjoys a strong position in Finland and the Nordic region in general. Expertise levels are high and training courses are attracting students. But to secure its future the industry must retain its lead. A technology strategy published recently by Tekes, the National Technology Agency of Finland, says the keys to success are sustained research and development work and new forms …	2002	84	3	140-+
19194	Hagvar, Sigmund	Decomposing cones of Norway spruce (Picea abies (L.) H. Karst.): dry weight loss, chemical changes, and vertical transport in a Norwegian raw humus soil profile	Scandinavian Journal of Forest Research	Naturally shed cones of Norway spruce (Picea abies) were placed on the forest floor, partly on moss-covered ground, and partly on vegetation-free needle mats. Numbered sticks allowed individual recovery after 1, 3, 5, 7, 9, 11, and 13 years. During the first nine years, cones decomposed fastest in the moss site. After 13 years, dry weight loss was about 60% in both habitats, but cones still retai…	2015	30	8	643-652
19195	Hagvar, Sigmund and Baekken, Bjorn Tore	Forest strips left along water and bog can be valuable for birds. A case of experimental cutting	Ornis Norvegica	An experimental cutting was performed in Grue municipality, Hedmark, to study the value for birds of retaining a forest strip along bog and water. Two study areas of mature coniferous forest were selected, each 600 x 200 m, with one of the long sides towards either water or bog. Before logging started, all bird territories were mapped during two years. In the third breeding season, a 50 m wide fo…	2005	28	1	51-57
19196	Hagvar, S., Nygaard, P. and Baekken, B. T.	Retention of forest strips for bird-life adjacent to water and bogs in Norway: Effect of different widths and habitat variables	Scandinavian Journal of Forest Research	In Fennoscandinan forestry, retention of forest strips as a buffer adjacent to water and bogs has long been recommended, but their biological value is poorly known and practice varies greatly. This study explored the value for breeding birds of retaining buffer strips of different width and structure, after clear-cutting in coniferous forest. The presence of birds during their nesting season was …	2004	19	5	452-465
19197	Hahl, J.	New generation of Scots pine seed orchards to be established soon	Metsanjalostussaatio 1991.	Work in progress on how genotypes are being selected for inclusion in the next generation of Pinus sylvestris seed orchards is described. The current first generation seed orchards in central and southern Finland are 22-25 years old and are expected to retain full productivity up to the age of 35-40 years. The next generation is expected to yield seed far in excess of the current average yields, …	1992			8-11, 29-30
19198	Hakala, Antero V. K.	Aspects of the origin of the Scandinavian mountain reindeer and the early man in Fennoscandia with some comments on the history of small mammals	Aquilo Ser Zoologica		1993	28		2019-11-21
19199	Hakkila, P.	Crown mass of trees at harvesting	Book Section	For integrated recovery of stem and crown biomass, it is important (both for operational planning of harvesting and value estimation) to know the proportions of different tree components. A study was made of the quantity, composition and vertical distribution of crown mass in Scots pine (Pinus sylvestris), Norway spruce (Picea abies) and mixed birch (Betula pendula/B. pubescens) in a total of 130…	1991
19200	Hallinger, Martin, Johansson, Victor, Schmalholz, Martin, Sjoberg, Samuel and Ranius, Thomas	Factors driving tree mortality in retained forest fragments	Forest Ecology and Management	Green tree retention is often applied in forests otherwise harvested by clearcutting. Its aim is to support biodiversity by contributing to a continuity of living trees and large-diameter dead wood in the new generation of a forest. However, high levels of mortality can undermine the aims of tree retention and pose a concern for forest managers. Therefore, knowledge about the mortality of retenti…	2016	368		163-172
19201	Hallinger, Martin, Karvemo, Simon and Ranius, Thomas	Does it pay to concentrate conservation efforts for dead-wood dependent insects close to existing reserves: a test on conservation planning in Sweden	Insect Conservation and Diversity	Forestry has significantly changed many boreal forest landscapes with negative effects on biodiversity. Main reasons are habitat loss and deterioration, due to a simplified forest composition, including a reduction in old trees and dead wood. In Sweden, measures to counter the loss of biodiversity are taken at forest harvesting, and include forest harvest retention. Areas of high conservation val…	2018	11	4	317-329
19202	Hallsby, G.	The influence of different forest organic matter on the growth of one-year old planted Norway spruce seedlings in a greenhouse experiment	New Forests	One-year-old Norway spruce (Picea abies) seedlings were grown for 26 weeks in pots containing pure mineral soil and forest organic matter - collected in the Svarberget Experimental Forest, Sweden. Soil organic matter was in one of three different states of decomposition -needles and twigs (fresh), mor (from the top 2-3 cm of the soil F-horizon) and humus (from the bottom 1-2 cm of the H-horizon).…	1994	8	1	43-60
19203	Hamalainen, A.	Retention forestry and intensified biomass harvest: epiphytic lichen assemblages under opposing ecological effects in pine-dominated boreal forests	Dissertationes Forestales	Intensive forestry has led to changes in the structure and function of boreal forests and to the endangerment of forest-dwelling species. Different management methods, such as retention forestry, have been developed to counter the negative biodiversity impacts, although forest use has intensified at the same time: for example, stumps and logging residues are commonly harvested for biofuel. This t…	2016		218	33 pp.-33 pp.
19204	Hamalainen, Aino, Hujo, Mika, Heikkala, Osmo, Junninen, Kaisa and Kouki, Jari	Retention tree characteristics have major influence on the post-harvest tree mortality and availability of coarse woody debris in clear-cut areas	Forest Ecology and Management	Retention forestry is widely used for reducing the negative biodiversity impacts of forest management. Its effectiveness depends, however, on the post-harvest dynamics of the retention trees, which in turn are likely affected by both tree- and stand-level factors. Understanding the effects of these factors on tree dynamics is thus essential for evaluating the biodiversity effects of retention for…	2016	369		66-73
19205	Hamalainen, A., Kouki, J. and Lohmus, P.	The value of retained Scots pines and their dead wood legacies for lichen diversity in clear-cut forests: The effects of retention level and prescribed burning	Forest Ecology and Management	To mitigate the negative impact of intensive forest management on biodiversity, several silvicultural measures are used in production forests. We studied the effect of two such treatments, green-tree retention and prescribed burning on epiphytic lichens 11 years after timber harvests in Scots pine (Pinus sylvestris) dominated forests of middle boreal Finland. Lichen assemblages were sampled from …	2014	324		89-100
19206	Hamalainen, A., Kouki, J. and Lohmus, P.	Potential biodiversity impacts of forest biofuel harvest: lichen assemblages on stumps and slash of Scots pine	Canadian Journal of Forest Research	Harvesting stumps and logging residues for energy production may have negative impacts on forest species, especially those associated with dead wood. We assessed the potential impact of biofuel harvest on epiphytic lichens by studying the lichen assemblages on stumps and downed fine woody debris (FWD) of Scots pine (Pinus sylvestris L.) in clear-cut, mature managed, and old-growth forest stands i…	2015	45	10	1239-1247
19207	Hammond, H. E. J., Langor, D. W. and Spence, J. R.	Saproxylic beetles (Coleoptera) using Populus in boreal aspen stands of western Canada: spatiotemporal variation and conservation of assemblages	Canadian Journal of Forest Research	Saproxylic beetles associated with Populus coarse woody material were sampled from two age classes of fire-origin aspen stands in north-central Alberta, Canada. A combination of rearings from wood bolts and window traps attached to snags yielded 9571 beetles representing 257 taxa over the 3-year period (1993-1995). We investigated faunal variation across regions, stand ages (mature, 60-90 years; …	2004	34	1	2019-01-19
19208	Hamouz, Vladimir, Lohne, Jardar, Wood, Jaran R. and Muthanna, Tone M.	Hydrological Performance of LECA-Based Roofs in Cold Climates	Water	Rooftops represent a considerable part of the impervious fractions of urban environments. Detaining and retaining runoff from vegetated rooftops can be a significant contribution to reducing the effects of urbanization, with respect to increased runoff peaks and volumes fromprecipitation events. However, in climates with limited evapotranspiration, a non-vegetated system is a convenient option fo…	2018	10	3
19209	Handley, W. R. C.	Mull and mor formation in relation to forest soils	Bull. For. Commn., Lond.	The First part of this bulletin (pp. 1-52) is a survey of previous work on the subject from which the following conclusions are derived: (a) The quantity of cellulose in the organic matter of mor is greater than that in mull, (b) The N of mor appears to exhibit a greater degree of resistance to mobilization by biological agencies than that of mull. (c) There is a tendency for the production of ex…	1954	23		iv + 115 pp.-iv + 115 pp.
19210	Hannelius, S.	Forest real estate purchase price statistics as a basis for comparison in real estate appraisal	Book	The suitability of the purchase price register as a basis for real-estate appraisal was assessed, using data from 98 forest real estates of over 5 ha in the province of Mikkeli, eastern Finland, sold in the period 1.4.1975-28.2.1977. It was found that the register is subject to errors that lead to underestimation of purchase prices. The main reasons for the underestimates are transfers between re…	1982
19211	Hanninen, H., Koskela, T. and Kurttila, M.	Finnish family forest owners' retention tree management behaviour	Scandinavian Forest Economics	In Scandinavia a widely adopted biodiversity maintenance measure in managed forests is to leave retention trees to the clearcutting areas. A certain number of retention trees are left to the cutting area permanently as residual trees, which distinguishes them from shelterwood and seed trees. The aim is to increase the amount of large-diameter decayed wood in managed forest stands throughout their…	2008		42	344-360
19212	Hansen, J. K., Wellendorf, H. and Kjaer, E. D.	Low cost improvement of Coastal Douglas-fir (Pseudotsuga menziesii var. menziesii (Mirb.) franco) by application of the breeding seed orchard approach in Denmark	Silvae Genetica	An evaluation of a seedling seed orchard in Denmark of Coastal Douglas-fir showed variation between open pollinated families in their susceptibility to windthrow, height and diameter growth, stem straightness, number of forks at age 10 and bud burst at age 9. Individual narrow-sense heritability was 0.63 for bud burst, 0.40 for height and diameter, respectively, 0.48 for stem straightness, 0.20 f…	2005	54	2019-04-05	218-227
19213	Hanso, M. and Drenkhan, R.	Lophodermium needle cast, insect defoliation and growth responses of young Scots pines in Estonia	Forest Pathology	Using a retrospective approach, based on historical needle cast disease and insect pest records, data series of needle losses (reconstructed by the use of the needle trace method), tree growth parameters and meteorological data were studied to determine the impact of the appropriate pointer (epidemic or calamity) years on the annual radial and height increment of 46 sample trees in six Scots pine…	2012	42	2	124-135
19214	Hanssen, K. H., Granhus, A., Braekke, F. H. and Haveraaen, O.	Performance of sown and naturally regenerated Picea abies seedlings under different scarification and harvesting regimens	Scandinavian Journal of Forest Research	Establishment, survival and height growth of sown and naturally regenerated Picea abies (L.) Karst. seedlings were examined in a 6 yr period in eight stands on bilberry woodland in south-east Norway. Five harvesting treatments (shelterwoods of high, medium and low density, 25x25 m patch-cut, 50x50 m clear-cut) and three scarification alternatives (unscarified, patch scarification, inverting) were…	2003	18	4	351-361
19215	Hansson, L.	Traditional management of forests: plant and bird community responses to alternative restoration of oak-hazel woodland in Sweden	Biodiversity and Conservation	Species richness of vascular plants and birds were examined in relation to five types of management (including abandonment) of oak-hazel woodland in south-central Sweden. The biodiversity of this type of woodland is affected by lengthy management in contrast to present emphasis on the fragmentation of more or less pristine forests. The woodlands derive from old deciduous forests but were a source…	2001	10	11	1865-1873
19216	Hansson, L.	Mammal movements and foraging at remnant woodlands inside coniferous forest landscapes	Forest Ecology and Management	Temporary or spatially restricted resources may affect population densities over more or less wide areas in the surrounding landscape or region. They may affect more than one trophic level by facilitation of predation. Areas of influence may differ between species. Such effects of mast-seeding in confined oak-hazel woodlands were examined for a guild of mainly seed-eating mammals and their predat…	2002	160	2019-01-03	109-114
19217	Hansson, Per	Effects of small tree retention and logging slash on snow blight growth on Scots pine regeneration	Forest Ecology and Management	Inoculation experiments were performed to compare the growth of snow blight (Phacidium infestans Karst.) mycelium on Scots pine (Pinus sylvestris L.) seedlings on sites with or without undergrowth and green logging slash. Inoculations were performed on Scots pine seedlings planted within undergrowth of Scots pine, Norway spruce (Picea abies (L.) Karst.) and birch (Betula sp.). Snow depth and temp…	2006	236	2019-02-03	368-374
19218	Harmaja, H.	Studies in Otidea (Pezizales)	Karstenia	Three new species of Otidea (Pers.) Bonord. (Pyronemataceae, Pezizales) are described on the basis of Finnish material: Otidea angusta Harmaja, Otidea caeruleopruinosa Harmaja, and Otidea flavidobrunneola Harmaja. They were found in rich woods with more or less calcareous soils in SW Finland. A synopsis with an annotated list of the twenty species of Otidea in Finland is presented, four of the la…	2009	48	2	33-48
19219	Hart, Stephen and Luckai, Nancy	Charcoal function and management in boreal ecosystems	Journal of Applied Ecology	Charcoal plays an important role in soil function and carbon storage in fire-prone ecosystems. Charcoal is present in most boreal forest soils as a result of naturally recurring wildfires, which convert 0.7-2% of biomass to charcoal. In boreal forests, charcoal represents 8-10% of soil carbon and 1 pg of carbon globally. Charcoal is resistant to decay, representing a form of super-passive carbon,…	2013	50	5	1197-1206
19220	Hartikainen, Salla H. and Hartikainen, H. Helina	Phosphorus retention by phlogopite-rich mine tailings	Applied Geochemistry	Sewage water rich in P poses a threat to natural water systems. In households that are not connected to a sewer network, an easily maintained purification technique is needed to remove P from domestic waste waters. In the present study, the P retention properties of phlogopite-rich mine tailings were studied to determine whether the untapped tailings can be utilised in wastewater treatment for th…	2008	23	9	2716-2723
19221	Hassanin, A., Breivik, K., Meijer, S. N., Steinnes, E., Thomas, G. O. and Jones, K. C.	PBDEs in European background soils: Levels and factors controlling their distribution	Environmental Science & Technology	Surface soils (0-5 cm) from remote/rural woodland (coniferous and deciduous) and grassland locations on a latitudinal transect through the United Kingdom and Norway were analyzed for polybrominated diphenyl ethers (PBDEs). Concentrations ranged between 65 and 12 000 Sigma(ALL)PBDE ng kg(-1) dry weight. PBDE-47, -99, -100, -153, and -154-the major constituents of the penta-BDE technical product-do…	2004	38	3	738-745
19222	Hasselquist, Niles J. and Hogberg, Peter	Dosage and duration effects of nitrogen additions on ectomycorrhizal sporocarp production and functioning: an example from two N-limited boreal forests	Ecology and Evolution	1 Although it is well known that nitrogen (N) additions strongly affect ecto-mycorrhizal (EM) fungal community composition, less is known about how different N application rates and duration of N additions affect the functional role EM fungi play in the forest N cycle. 2 We measured EM sporocarp abundance and species richness as well as determined the delta N-15 in EM sporocarps and tree foliage …	2014	4	15	3015-3026
19223	Haukioja, E., Niemela, P. and Siren, S.	FOLIAGE PHENOLS AND NITROGEN IN RELATION TO GROWTH, INSECT DAMAGE, AND ABILITY TO RECOVER AFTER DEFOLIATION, IN THE MOUNTAIN BIRCH BETULA-PUBESCENS-SSP-TORTUOSA	Oecologia		1985	65	2	214-222
19224	Hautala, H., Jalonen, J., Laaka-Lindberg, S. and Vanha-Majamaa, I.	Impacts of retention felling on coarse woody debris (CWD) in mature boreal spruce forests in Finland	Biodiversity and Conservation	We studied the immediate changes in pre-treatment coarse woody debris (CWD)(1) after retention felling and mechanical site preparation (scarification) in mature Picea abies-dominated boreal forest. Retention felling and scarification were hypothetised to affect the amount of CWD. The disturbance caused to CWD was assumed to depend on species and decay class. Logs were inventoried before fellings,…	2004	13	8	1541-1554
19225	Hautala, Harri, Laaka-Lindberg, Sanna and Vanha-Majamaa, Ilkka	Effects of Retention Felling on Epixylic Species in Boreal Spruce Forests in Southern Finland	Restoration Ecology	We studied the effects of patch retention felling and soil scarification by harrowing on the coverage and species richness of epixylic species in boreal Norway spruce (Picea abies) forests in Southern Finland. The epixylics were investigated from both the retention tree groups (RTGs) and the surrounding felling areas before and after fellings and after scarification on consecutive years. The cove…	2011	19	3	418-429
19226	Hautala, Harri and Vanha-Majamaa, Ilkka	Immediate tree uprooting after retention-felling in a coniferous boreal forest in Fennoscandia	Canadian Journal of Forest Research-Revue Canadienne De Recherche Forestiere	We studied the immediate effects of retention-felling on the occurrence of tree uprooting in two different types of boreal spruce forest in Finland to determine whether susceptibility to uprooting is dependent on the biotope. During the first post-treatment year, 7.1% of the trees in the paludified forest type and 1.8% in the upland forest type were uprooted. During the 2 following post-treatment…	2006	36	12	3167-3172
19227	Haycock, N. E., Pinay, G. and Walker, C.	NITROGEN-RETENTION IN RIVER CORRIDORS - EUROPEAN PERSPECTIVE	Ambio	The problem of nitrogen pollution in European surface- and groundwaters has become a focus of recent European and Scandinavian directives, with legislation calling for a 50% reduction of N losses by the years 1995 and 2000, respectively. This paper provides a conceptual framework upon which management strategies to reduce losses of diffuse nitrogen pollution to surface waters may be based. The co…	1993	22	6	340-346
19228	Hayrinen, Liina, Mattila, Osmo, Berghall, Sami, Narhi, Markus and Toppinen, Anne	Exploring the future use of forests: perceptions from non-industrial private forest owners in Finland	Scandinavian Journal of Forest Research	The transformation of the forest sector toward a bioeconomy calls for finding new sources of competitive advantage for the whole sector to retain its future viability. Non-industrial private forest owners are an important group of actors in the Finnish forest-based sector, as they supply 80% of industrial roundwood and control numerous other tangible and intangible forest-based ecosystem services…	2017	32	4	327-337
19229	Hayward, G. D., Hayward, P. H. and Garton, E. O.	ECOLOGY OF BOREAL OWLS IN THE NORTHERN ROCKY-MOUNTAINS, USA	Wildlife Monographs	We studied habitat use by boreal owls (Aegolius funereus) in the northern Rocky Mountains from january through August during 1984-88. Habitat use was examined at several spatial scales. The geographic distribution and range of life zones used by boreal owls were documented in western Montana, Idaho, and northwestern Wyoming. Habitat use, at the level of the home range, and microhabitats used for …	1993		124	1-59
19230	Hazell, P.	Conservation and yield aspects of old European aspen Populus tremula L. in Swedish forestry	Book	This thesis summarizes the results of 2 studies in Sweden in which species from the rich epiphytic flora on aspen were used to evaluate important features of aspens, and 2 other studies in which these features are related to production losses due to the retention of aspen. The papers describing these 4 studies are included at the end of this publication (2 are by Hazell and other authors, and are…	1999
19231	Hazell, P. and Gustafsson, L.	Retention of trees at final harvest - evaluation of a conservation technique using epiphytic bryophyte and lichen transplants	Biological Conservation	Some trees are commonly retained as a conservation measure during forest harvest. However, their actual contribution to maintaining biodiversity is poorly known. In Swedish forests, aspen Populus tremula supports a rich epiphytic flora. The bryophyte Antitrichia curtipendula and the lichen Lobaria pulmonaria, used in forest inventories as indicators of long forest continuity and presence of red-l…	1999	90	2	133-142
19232	Hedemann Gade, E.	Clearance thinning of young forests should be carried out during the prevailing fuel shortage	Skogsagaren	With the present demand, particularly in southern and central Sweden, for small-sized stems for use as motor fuel or charcoal wood, clearance thinnings can be made economically in very young stands. In mixed stands the object is generally to remove Birch, Aspen and Sallow (Hippophae rhamnoides). However not all overshading broadleaved trees should be removed in the first operation. To obtain a sa…	1942	18		1985-07-01
19233	Hedenas, Henrik, Blomberg, Patrik and Ericson, Lars	Significance of old aspen (Populus tremula) trees for the occurrence of lichen photobionts	Biological Conservation	In the boreal forest landscape, aspen has been effectively selected against in favour of conifers. The decrease in aspen is of particular concern, since it has more host-specific species associated with it than any other boreal tree species. Recently, forest management systems have begun to include green-tree retention in order to maintain structural diversity Earlier studies have focused on the …	2007	135	3	380-387
19234	Hedenas, H. and Ericson, L.	Epiphytic macrolichens as conservation indicators: successional sequence in Populus tremula stands	Biological Conservation	We studied the species composition of epiphytic macrolichens in 18 aspen (Populus tremula) stands, in the boreal forest in Sweden. In total, 51 macrolichens were found, 15 of which were aspen specialists. Quantitative features, e.g. signal species, showed a stronger correlation than quantitative features, e.g. total number of species, with increasing stand age. Aspen specialists showed a signific…	2000	93	1	43-53
19235	Hedenas, H. and Ericson, L.	Response of epiphytic lichens on Populus tremula in a selective cutting experiment	Ecological Applications	Aspen (Populus tremula) is a key substrate for a large number of organisms in the boreal forest. Because aspen abundance is declining there is a need to develop alternative silvicultural practices in order to maintain aspen in the forest landscape. This study was initiated to document the response of epiphytic lichens on retained aspens in stands (size 1.75-3 ha) where 50% of the standing volume …	2003	13	4	1124-1134
19236	Hedenas, Henrik and Hedstrom, Per	Conservation of epiphytic lichens: Significance of remnant aspen (Populus tremula) trees in clear-cuts	Biological Conservation	In the boreal forest landscape, aspen has been effectively selected against in favour of conifers. The decrease in aspen is of particular concern since it has more host-specific species associated with it than any other boreal tree species. Recently forest management systems have begun to include green-tree retention in order to maintain structural diversity. We initiated this study in order to i…	2007	135	3	388-395
19237	Hedgren, P. O.	Dead wood retention and the risk of bark beetle attack	Acta Universitatis Agriculturae Sueciae - Silvestria	Wind-felled Norway spruce (Picea abies) trees left for conservation purposes and spruce stems stored as forest fuel may be colonized by the bark beetles Ips typographus and Pityogenes chalcographus (Coleoptera: Scolytidae). The risk of nearby living trees being attacked and killed by these species was experimentally investigated at stand edges bordering fresh clearcuts in Sweden. Attack by I. typ…	2002		247	papers-20 pp. + 4 papers
19238	Hedgren, Per Olof	The spruce bark beetle Ips typographus and dead wood retention	Entomologisk Tidskrift	The spruce bark beetle Ips typographus often reproduce in felled spruce trees, but sometimes it also attacks and kills mature spruce on a large scale. The aim to increase the level of dead wood in managed forests for biodiversity reasons (e.g. by retaining windfelled trees) may therefore pose a risk for economical damages. In this study, the risk of attack on living trees near windfelled spruces,…	2003	124	3	159-165
19239	Hedgren, P. O., Schroeder, L. M. and Weslien, J.	Tree killing by Ips typographus (Coleoptera : Scolytidae) at stand edges with and without colonized felled spruce trees	Agricultural and Forest Entomology	1 To maintain biodiversity in managed spruce forests in Sweden more wind-felled trees must be retained. However, there is concern among forest owners that this may result in higher tree mortality caused by the spruce bark beetle, Ips typographus (L.) (Col. Scolytidae). 2 To simulate wind-felled trees, living spruce trees were cut at spruce stand edges bordering fresh clear-cuttings. Treatments co…	2003	5	1	67-74
19240	Hedin, Jonas, Isacsson, Gunnar, Jonsell, Mats and Komonen, Atte	Forest fuel piles as ecological traps for saproxylic beetles in oak	Scandinavian Journal of Forest Research	Biodiversity management in broadleaved forests includes partial cutting to improve conditions for species that benefit from semi-open stand structure. The harvested wood is usually used as fuel and, therefore, it is stockpiled in situ for months before further processing. If such forest fuel piles attract saproxylic insects, they are likely to be ecological traps, because the settling cost for in…	2008	23	4	348-357
19241	Hedmark, Asa, Scholz, Miklas and Elowson, Torbjorn	Treatment of Log Yard Runoff Impacted by Aged Logs in a Free Water Surface Constructed Wetland	Environmental Engineering Science	Hurricanes pose a great risk to forestry, and lead to high financial losses due to destroyed wood. For example, the hurricane 'Gudrun' devastated a large part of the forests of southern Sweden in January 2005. Windthrown logs are commonly removed from forest, temporarily stored on log yards, and often sprinkled with water to avoid decay. However, the subsequent runoff may cause environmental poll…	2009	26	11	1623-1632
19242	Hedwall, P. O., Grip, H., Linder, S., Lovdahl, L., Nilsson, U. and Bergh, J.	Effects of clear-cutting and slash removal on soil water chemistry and forest-floor vegetation in a nutrient optimised Norway spruce stand	Silva Fennica	Fertilisation with nutrient optimisation has in Sweden resulted in large increases in volume growth in young stands of Norway spruce. There are, however, environmental concerns about repeated fertilisation and one is the risk of nutrient leakage to ground water resources and aquatic ecosystems after clear-cutting of such forests. The present study followed soil-water chemistry in optimised fertil…	2013	47	2	933-article id 933
19243	Hedwall, Per-Ola, Bergh, Johan and Nordin, Annika	Nitrogen-retention capacity in a fertilized forest after clear-cutting - the effect of forest-floor vegetation	Canadian Journal of Forest Research	Forest fertilization with nitrogen (N) has several benefits to society such as increased wood production and carbon sequestration. There are, however, concerns about N leakage, particularly following clear-cutting. The forest-floor vegetation may increase the N retention of forest ecosystems; however, very few studies have quantified the amount of vegetation required. We studied the relationship …	2015	45	1	130-134
19244	Hedwall, Per-Ola, Grip, Harald, Linder, Sune, Lovdahl, Lars, Nilsson, Urban and Bergh, Johan	Effects of clear-cutting and slash removal on soil water chemistry and forest-floor vegetation in a nutrient optimised Norway spruce stand	Silva Fennica	Fertilisation with nutrient optimisation has in Sweden resulted in large increases in volume growth in young stands of Norway spruce. There are, however, environmental concerns about repeated fertilisation and one is the risk of nutrient leakage to ground water resources and aquatic ecosystems after clear-cutting of such forests. The present study followed soil-water chemistry in optimised fertil…	2013	47	2
19245	Heikkala, O.	Emulation of natural disturbances and the maintenance of biodiversity in managed boreal forests: the effects of prescribed fire and retention forestry on insect assemblages	Dissertationes Forestales	Intensive forest management and effective prevention of natural disturbances have caused major changes in forest ecosystems and many forest habitats and species are now threatened. Retention forestry and prescribed burning are methods that aim to bring the legacies of forest management closer to those of natural disturbances and to maintain biodiversity in managed forests. In this thesis, the eff…	2016		222	46 pp.-46 pp.
19246	Heikkala, Osmo, Martikainen, Petri and Kouki, Jari	Decadal effects of emulating natural disturbances in forest management on saproxylic beetle assemblages	Biological Conservation	Prescribed burning and retention forestry are used to bring the biological legacies of forest harvesting closer to those of natural disturbances. Although widely used, the effects of these methods on species assemblages in the longer term are still relatively unknown. In 2000, we established a large-scale replicated field experiment to explore the effects of prescribed burning and tree retention …	2016	194		39-47
19247	Heikkala, Osmo, Martikainen, Petri and Kouki, Jari	Prescribed burning is an effective and quick method to conserve rare pyrophilous forest-dwelling flat bugs	Insect Conservation and Diversity	1. Fire suppression and reduced volumes of dead wood have led to a major decline in pyrophilous and saproxylic insects in Fennoscandian boreal forests. As a consequence, several species are currently seriously threatened. Flat bugs (Heteroptera, Aradidae) is an important invertebrate group that includes several pyrophilous species, including many threatened ones. 2. We explored whether specific c…	2017	10	1	32-41
19248	Heikkala, Osmo, Seibold, Sebastian, Koivula, Matti, Martikainen, Petri, Mueller, Joerg, Thorn, Simon and Kouki, Jari	Retention forestry and prescribed burning result in functionally different saproxylic beetle assemblages than clear-cutting	Forest Ecology and Management	In fire-susceptible boreal forests, clear-cutting has been justified as being a harvesting regime that mimics natural stand-replacing dynamics, despite obvious differences in its biological legacies. Prescribed burning and retention forestry are commonly applied to better maintain naturally occurring legacies, but the community-level effects of different disturbances on the functional characteris…	2016	359		51-58
19249	Heikkala, Osmo, Suominen, Mai, Junninen, Kaisa, Hamalainen, Aino and Kouki, Jari	Effects of retention level and fire on retention tree dynamics in boreal forests	Forest Ecology and Management	Retention forestry has been used for over 20 years to reduce the unfavorable impacts of intensive forest management on biodiversity. The assumed positive effects of retention trees, however, depend on the dynamics of trees in providing substrates or structures for forest-dwelling organisms. In 2000 an experimental study was established to investigate the effects of different retention levels (10 …	2014	328		193-201
19250	Heikkinen, K., Karppinen, A., Karjalainen, S. M., Postila, H., Hadzic, M., Tolkkinen, M., Marttila, H., Ihme, R. and Klove, B.	Long-term purification efficiency and factors affecting performance in peatland-based treatment wetlands: An analysis of 28 peat extraction sites in Finland	Ecological Engineering	Peatland-based treatment wetlands that purify incoming water by means of natural physical, chemical and biological processes belonging to the peatland ecosystem are widely used at Finnish peat extraction sites. They can comprise either undrained or drained overland flow areas (OFAs or DOFAs), with the OFAs representing the best available technology (BAT) for peat extraction. We analyse here the l…	2018	117		153-164
19251	Heikurainen, L.	Birch problem on drained peat lands	Metsataloudellinen Aikakauskirja	Results of the third National Forest Survey in Finland show that the % of Birch is higher in drained areas than on any forest site type on firm ground. There are considerable differences between its occurrence in different climatic areas. On some peat types, conifers will predominate naturally, on others artificial regeneration will be necessary. On most drained peatlands, normal thinnings will s…	1959		9	318-21
19252	Heinonen, T., Pukkala, T., Ikonen, V. P., Peltola, H., Venalainen, A. and Dupont, S.	Integrating the risk of wind damage into forest planning	Forest Ecology and Management	Wind is the major abiotic risk factor in Finnish forests. Therefore, tools that help managers to assess the risk of wind damage are required. This study developed simple regression models for predicting the critical wind speed needed to uproot Scots pine, Norway spruce and birch trees at the stand edges in Finnish conditions, using the characteristics of the retained forest both downwind and upwi…	2009	258	7	1567-1577
19253	Heinrichs, Steffi and Schmidt, Wolfgang	Short-term effects of selection and clear cutting on the shrub and herb layer vegetation during the conversion of even-aged Norway spruce stands into mixed stands	Forest Ecology and Management	The conversion of even-aged Norway spruce (Picea abies (L) H. Karst.) stands into more site adapted mixed stands is the main silvicultural goal in Germany and many other European countries. The conversion will primarily be achieved with the help of selection cutting, removing single target diameter trees and creating small gaps. At sites highly susceptible to windthrow, however, small scale clear…	2009	258	5	667-678
19254	Heinrichs, S. and Schmidt, W.	From pure spruce to mixed stands: what contributes the shrub and herb layer vegetation to ecosystem functioning?	Forstarchiv	The conversion of pure Norway spruce (Picea abies) stands into stable and close-to-nature mixed stands is a main silvicultural goal in Germany. The establishment of a large-scale and long term Before-After/Control-Impact (BACI)-experiment in the Soiling hills (Lower Saxony, Germany) enables monitoring the effects of the conversion methods selective cutting and small-scale clear cutting on the fun…	2009	80	1	23-28
19255	Heiskanen, J.	Variation in water retention characteristics of peat growth media used in tree nurseries	Silva Fennica	The water retention characteristics and their variation in tree nurseries and related physical properties were determined for commercially produced growth media made of light, low humified Sphagnum peat. A total of 100 samples of peat media were collected from filled seedling trays in the greenhouses of four Finnish nurseries in 1990 before seedlings were grown in the trays. In addition, the phys…	1993	27	2	77-97
19256	Heiskanen, J.	Hydrological properties of container media based on sphagnum peat and their potential implications for availability of water to seedlings after outplanting	Scandinavian Journal of Forest Research	Hydrological properties. in particular water-retention characteristics (WRC) and hydraulic conductivity (K), were studied in eight different growth media based on low-humified sphagnum peal with coarse (perlite) and fine (sand) constituents. The temporal change of matric potential (psi) in the media, which were connected to two contrasting mineral soils (fine and coarse sandy soil) with higher ps…	1999	14	1	78-85
19257	Heiskanen, J., Hallikainen, V., Uusitalo, J. and Ilvesniemi, H.	Co-variation relations of physical soil properties and site characteristics of Finnish upland forests	Silva Fennica	Physical soil properties have a marked influence on the quality of forest sites and on the preconditions for forest growth and management. In this study, water retention characteristics (WRC) and related physical soil properties in addition to vegetation coverage and tree stand data were studied at upland forest sites in Finland. Fixed and mixed models between soil and site characteristics were f…	2018	52	3	9948-article id 9948
19258	Heiskanen, Juha, Hallikainen, Ville, Uusitalo, Jori and Ilvesniemi, Hannu	Co-variation relations of physical soil properties and site characteristics of Finnish upland forests	Silva Fennica	Physical soil properties have a marked influence on the quality of forest sites and on the preconditions for forest growth and management. In this study, water retention characteristics (WRC) and related physical soil properties in addition to vegetation coverage and tree stand data were studied at upland forest sites in Finland. Fixed and mixed models between soil and site characteristics were f…	2018	52	3
19259	Heiskanen, J. and Makitalo, K.	Soil water-retention characteristics of Scots pine and Norway spruce forest sites in Finnish Lapland	Forest Ecology and Management	Scots pine and Norway spruce forests, which differ from each other ecologically and economically, dominate in Finnish Lapland. The need to investigate the soil properties of these forests has increased due to the problems found in forest reforestation. The present paper examines soil water-retention characteristics (WRC), hydraulic conductivity (K), texture and organic matter content (OMC) in 10 …	2002	162	2019-02-03	137-152
19260	Heiskanen, Juha, Makitalo, Kari and Hyvonen, Juha	Long-term influence of site preparation on water-retention characteristics of forest soil in Finnish Lapland	Forest Ecology and Management	Site preparation is commonly used with reforestation in Lapland, but environmental aspects of site preparation, such as visual impacts and possible changes in runoff, soil density and aeration, often raise questions. The present study investigated, 21 years after site preparation and reforestation with Scots pine, how ploughed ridges affect water-retention characteristics of till soils compared w…	2007	241	2019-01-03	127-133
19261	Heiskanen, J. and Rikala, R.	Effect of feat-based container media on establishment of Scots pine, Norway spruce and silver birch seedlings after transplanting in contrasting water conditions	Scandinavian Journal of Forest Research	Container seedlings were grown in pure sphagnum pear and peat mixtures containing coarse perlite and/or fine sand 25% by volume. Soil-water availability and rooting of the seedlings into the surrounding sandy soil after transplanting were studied in contrasting soil-water conditions in a greenhouse and a field experiment. No clear benefit was found for seedling rooting and establishment after pla…	2000	15	1	49-57
19262	Heiskanen, Juha, Saksa, Limo and Hyvonen, Juha	Effects of mounding and soil clay content on postplanting success of Norway spruce	Forest Ecology and Management	Effective soil preparation by mounding is a common practice that precedes the outplanting of Norway spruce (Picea abies (L.) Karst.) in Finland, because of the improved survival and early growth of seedlings. On fine-grained soils, however, the postplanting performance of seedlings with mounding has been poorer than on coarser soils. The ecology of seedling growth and the effects of mounding on i…	2016	378		206-213
19263	Hekkala, Anne-Maarit, Paatalo, Marja-Leena, Tarvainen, Oili and Tolvanen, Anne	Restoration of Young Forests in Eastern Finland: Benefits for Saproxylic Beetles ( Coleoptera)	Restoration Ecology		2014	22	2	151-159
19264	Helama, Samuli, Melvin, Thomas M. and Briffa, Keith R.	Regional curve standardization: State of the art	Holocene	Tree rings are commonly used proxy data for past climate variability. Probably the simplest practical solution for transforming raw tree-ring data into proxy estimates and retaining information on low-frequency tree-growth forcing is the regional curve standardization (RCS). This paper reviews the RCS concept and the development of this standardization method over the past 25 years. Tree-ring bas…	2017	27	1	172-177
19265	Hendry, S. J., Poole, E. J., Craig, I. and Proudfoot, J. C.	Forest condition 2004	Book Section	Crown density and other features indicative of tree condition were assessed on a total of 8256 trees of five species - Sitka spruce, Norway spruce, Scots pine, oak and beech - distributed over 344 plots throughout Britain. Growing conditions during 2004 were generally good and the condition of all of the surveyed species except beech showed some improvement. A distinct increase in the crown densi…	2005
19266	Henningsson, B. and Omer, S.	Protection against fungal decay in farm buildings	Book	A general discussion of decay and its control in Sweden with particular reference to the wood preservatives suitable for use in farm buildings of the timber-frame and pole-house types. A list is given of water-borne and organic solvent based wood preservatives approved by the Nordic Wood Preservation Council with their retention classes, expiry date for approval and certificate number.	1984
19267	Henriksen, A., Hindar, A., Hessen, D. O. and Kaste, O.	Contribution of nitrogen to acidity in the Bjerkreim river in southwestern Norway	Ambio	In the acidified areas of southern Norway, sulfate deposition has decreased by about 40% since 1980, while nitrogen deposition has been constant during the same period. The wet deposition of nitrogen today is about twice that of sulfur. Consequently, the relative importance of nitrogen for the acidification of surface waters and soils has increased. In the Bjerkreim river catchment (southwestern …	1997	26	5	304-311
19268	Herrmann, Steffen and Bauhus, Juergen	Nutrient retention and release in coarse woody debris of three important central European tree species and the use of NIRS to determine deadwood chemical properties	Forest Ecosystems	Background: Coarse woody debris (CWD) is very important for forest ecosystems, particularly for biodiversity and carbon storage. Its relevance as a possible reservoir and source of nutrients is less clear, especially in central Europe. Methods: Based on a chronosequence of known ages of logs, we analyzed the nutrients stored in CWD of Fagus sylvatica, Picea abies, and Pinus sylvestris at differen…	2018	5
19269	Hessen, D. O., Henriksen, A., Hindar, A., Mulder, J., Torseth, K. and Vagstad, N.	Human impacts on the nitrogen cycle: A global problem judged from a local perspective	Ambio	This chapter revisits the major problems relating to manmade disturbances in the global nitrogen (N) cycle, and links the local findings from the project to the large-scale effects. The human transformation of atmospheric N-2 to chemically and biologically more reactive species causes a number of environmental effects. The focus of this project has been budget estimates of N for two large watersh…	1997	26	5	321-325
19270	Hietanen, Tomi M., Osterberg, Monika and Backfolk, Kaj A.	Effects on Pulp Properties of Magnesium Hydroxide in Peroxide Bleaching	Bioresources	High alkalinity in peroxide bleaching has traditionally been achieved using sodium hydroxide and sodium silicate. In the present work, partial and total substitution of traditional sodium-based peroxide bleaching auxiliary chemicals with a highly pure magnesium hydroxide-based bleaching additive was studied on two high-brightness mechanical pulp types from Norwegian spruce (Picea abies): pressure…	2013	8	2	2337-2350
19271	Hiiesaar, Kulli, Kaart, Tanel, Williams, Ingrid H., Luik, Anne, Metspalu, Luule, Ploomi, Angela, Kruus, Eha, Jogar, Katrin and Mand, Marika	Dynamics of Supercooling Ability and Cold Tolerance o f the Alder Beetle (Coleoptera: Chrysomelidae)	Environmental Entomology	Agelastica alni L. (Coleoptera: Chrysomelidae) is a common beetle pest of alder trees (Alnus incana L.) in forests and parks across Estonia.The supercooling ability and capacity to survive low temperature exposure changes temporally. Relatively high unimodal supercooling point (SCP) levels (with a mean value of -6 to -8 degrees C) were characteristic of the beetles in September during their diapa…	2018	47	4	1024-1029
19272	Hiley, W. E.	Numerical thinning: with special reference to Japanese Larch	Forestry	A distinction is drawn between qualitative and quantitative (numerical) methods of describing and specifying thinnings. It is urged that foresters should learn to use numerical specifications and should acquire the technique of thinning to any desired number of trees per acre. If the numbers of trees are plotted against height or age, a thinning grade can be represented by a graph. A series of su…	1952	25	1	2019-10-08
19273	Hilmo, Olga, Ely-Aastrup, Hilde, Hytteborn, Hakan and Holien, Hakon	Population characteristics of old forest associated epiphytic lichens in Picea abies plantations in the boreal rainforest of Central Norway	Canadian Journal of Forest Research-Revue Canadienne De Recherche Forestiere	The boreal rainforest in Central Norway is rich in rare and (or) red-listed epiphytic lichens but is subject to forest harvesting. Natural old Picea abies (L.) H. Karst. forests have been replaced increasingly by dense, even-aged plantations. This study aims at increasing our knowledge about populations of old forest associated lichens in P. abies plantations. In differently aged plantations, we …	2011	41	9	1743-1753
19274	Hindar, A., Henriksen, A., Kaste, O. and Torseth, K.	Extreme acidification in small catchments in southwestern Norway associated with a sea salt episode	Water Air and Soil Pollution	During heavy storm events in January 1993 in the coastal areas of south-western Norway, a sea salt episode created extreme acidification in the afforested Svela catchment. Stream-water chloride increased sharply to eight times the normal concentration and the non-marine Na concentration was calculated to -208 mu eq L. Negative values indicate that Na was retained in the soil profile,By ion-exchan…	1995	85	2	547-552
19275	Hindar, A., Nilsen, P., Skiple, A. and Hogberget, R.	Counteractions against acidification in forests ecosystems, effects on stream water quality after dolomite application to forest soil in Gjerstad, Norway	Water Air and Soil Pollution	The deposition of strong acids is one of many threats to forest ecosystems and viable forestry. Several counteractions against acidification have been launched, e.g. changes in forestry management and the introduction of chemicals. The inter-institutional programme ''Counteractions Against Acidification in Forest Ecosystems'' was established in 1993 to evaluate existing knowledge and run experime…	1995	85	2	1027-1032
19276	Hiron, Matthew, Jonsell, Mats, Kubart, Ariana, Thor, Goran, Schroeder, Martin, Dahlberg, Anders, Johansson, Victor and Ranius, Thomas	Consequences of bioenergy wood extraction for landscape-level availability of habitat for dead wood-dependent organisms	Journal of Environmental Management	Stumps and slash resulting from forest clearcutting is used as a source of low-net-carbon energy, but there are concerns about the consequences of biofuel extraction on biodiversity. Logging residues constitute potentially important habitats, since a large part of forest biodiversity is dependent on dead wood. Here we used snapshot field data from a managed forest landscape (25 000 ha) to predict…	2017	198		33-42
19277	Hjalten, J., Dynesius, M., Hekkala, A. M., Karlsson-Tiselius, A., Lofroth, T. and Mugerwa-Pettersson, R.	Saproxylic Insects and Fire	Book Section	Fire plays a prominent role in many biomes, but the natural fire regime has been influenced by silvicultural management, changes in land use, climate changes, and fire suppression. Fire clearly induces profound changes in both habitat characteristics and assemblages of saproxylic insects. However, our current understanding on this is strongly biased toward coniferous boreal and temperate systems …	2018
19278	Hjalten, Joakim, Gibb, Heloise and Ball, John P.	How will low-intensity burning after clear-felling affect mid-boreal insect assemblages?	Basic and Applied Ecology	Intensive forest management and fire protection programs have dramatically reduced the frequency of fires and this is believed to have negative effects on biodiversity. As a result, fire is used as a restoration tool to improve conditions for fire adapted/favoured species. The aim of our study was to determine how burning of clear-felled areas (i.e. those typical of real-world management in Fenno…	2010	11	4	363-372
19279	Hjalten, Joakim, Joelsson, Klara, Gibb, Heloise, Work, Timothy, Lofroth, Therese and Roberge, Jean-Michel	Biodiversity benefits for saproxylic beetles with uneven-aged silviculture	Forest Ecology and Management	Large scale use of even-aged silviculture (clear-cutting) commencing in the mid-20th century has had negative impacts on forest biodiversity. As a consequence, uneven-aged silviculture is currently being considered to help meet the ecological and social criteria required for sustainable forest management. Uneven-aged silviculture (e.g. selective felling) involves selective removal of some older t…	2017	402		37-50
19280	Hochapfel, H.	The cylindrosporium disease of sweet and acid cherries in Europe and North America	Phytopathologische Zeitschrift	In 1951, a Cylindrosporium leaf disease was notified in Germany on nursery seedlings of acid and sweet cherries and also on wildings. It had previously been recorded from France, Switzerland and Denmark. The symptoms were similar to those described for the leaf spot disease of cherries in North America caused by Cylindrosporium (Higginsia) hiemalis. The biology and control of the diseases as foun…	1952	19		389-402
19281	Hoen, H. F. and Solberg, B.	POTENTIAL AND ECONOMIC-EFFICIENCY OF CARBON SEQUESTRATION IN FOREST BIOMASS THROUGH SILVICULTURAL MANAGEMENT	Forest Science	This paper has two main objectives: First, to discuss in principle some vital methodological issues which have to be considered when analyzing bow preferable measures in forestry are to decrease the atmospheric concentration of greenhouse gases (GHGs). Economic evaluation of the flow of carbon in and out of the atmosphere is discussed, related particularly to two important problems: (1) the deter…	1994	40	3	429-451
19282	Hoffmann, Carl Christian, Berg, Peter, Dahl, Mette, Larsen, Soren E., Andersen, Hans E. and Andersen, Benny	Groundwater flow and transport of nutrients through a riparian meadow - Field data and modelling	Journal of Hydrology	Groundwater flow and nutrient transport were studied in a riparian meadow during a three-year period. The meadow is situated along a first order stream in the River Gjern catchment area, Jutland, Denmark. Field data included measurements of hydraulic head, hydraulic conductivity and soil characteristics. Groundwater sampled from piezometers was analysed for nitrate, ammonium and phosphate. Nitrog…	2006	331	2019-01-02	315-335
19283	Hoffmann, Carl Chr, Kronvang, Brian and Audet, Joachim	Evaluation of nutrient retention in four restored Danish riparian wetlands	Hydrobiologia	During the last 15-20 years, re-establishment of freshwater riparian wetlands and remeandering of streams and rivers have been used as a tool to mitigate nutrient load in downstream recipients in Denmark. The results obtained on monitoring four different streams and wetland restoration projects are compared with respect to hydrology, i.e. flow pattern and discharge of ground or surface water, ret…	2011	674	1	2019-05-24
19284	Hogberg, M. N., Myrold, D. D., Giesler, R. and Hogberg, P.	Contrasting patterns of soil N-cycling in model ecosystems of Fennoscandian boreal forests	Oecologia	The low plant productivity of boreal forests in general has been attributed to low soil N supply and low temperatures. Exceptionally high productivity occurs in toe-slope positions, and has been ascribed to influx of N from surrounding areas and higher rates of soil N turnover in situ. Despite large apparent natural variations in forest productivity, rates of gross soil N mineralization and gross…	2006	147	1	96-107
19285	Hogberg, P.	FORESTS LOSING LARGE QUANTITIES OF NITROGEN HAVE ELEVATED N-15-N-14 RATIOS	Oecologia		1990	84	2	229-231
19286	Hogberg, P.	DEVELOPMENT OF N-15 ENRICHMENT IN A NITROGEN-FERTILIZED FOREST SOIL PLANT-SYSTEM	Soil Biology & Biochemistry	The N-15 abundance of the current needles of Scots pine (Pinus sylvestris L.) collected during 19 yr of a long-term forest N fertilization experiment was measured. Unlabelled urea and NH4NO3 had been added each year at four rates, N0 (0 kg N ha-1), N1 (xBAR = 36 kg N ha-1), N2 (xBAR = 73 kg N ha-1) and N3 (xBAR = 109 kg N ha-1). Hence, the total amount of N added to N3 plots exceeded 2000 kg N ha…	1991	23	4	335-338
19287	Hogberg, P., Hogbom, L., Schinkel, H., Hogberg, M., Johannisson, C. and Wallmark, H.	N-15 abundance of surface soils, roots and mycorrhizas in profiles of European forest soils	Oecologia	N-15 natural abundances of soil total N, roots and mycorrhizas were studied in surface soil profiles in coniferous and broadleaved forests along a transect from central to northern Europe. Under conditions of N limitation in Sweden, there was an increase in delta(15)N of soil total N of up to 9 parts per thousand from the uppermost horizon of the organic mor layer down to the upper 0-5 cm of the …	1996	108	2	207-214
19288	Hogberg, Peter, Johannisson, Christian, Yarwood, Stephanie, Callesen, Ingeborg, Nasholm, Torgny, Myrold, David D. and Hogberg, Mona N.	Recovery of ectomycorrhiza after 'nitrogen saturation' of a conifer forest	New Phytologist	P>Trees reduce their carbon (C) allocation to roots and mycorrhizal fungi in response to high nitrogen (N) additions, which should reduce the N retention capacity of forests. The time needed for recovery of mycorrhizas after termination of N loading remains unknown. Here, we report the long-term impact of N loading and the recovery of ectomycorrhiza after high N loading on a Pinus sylvestris fore…	2011	189	2	515-525
19289	Hogberg, Peter, Nasholm, Torgny, Franklin, Oskar and Hogberg, Mona N.	Tamm Review: On the nature of the nitrogen limitation to plant growth in Fennoscandian boreal forests	Forest Ecology and Management	The supply of nitrogen commonly limits plant production in boreal forests and also affects species composition and ecosystem functions other than plant growth. These interrelations vary across the landscapes, with the highest N availability, plant growth and plant species richness in ground-water discharge areas (GDAs), typically in toe-slope positions, which receive solutes leaching from the muc…	2017	403		161-185
19290	Hogbom, L., Nilsson, U. and Orlander, G.	Nitrate dynamics after clear felling monitored by in vivo nitrate reductase activity (NRA) and natural N-15 abundance of Deschampsia flexuosa (L.) Trin	Forest Ecology and Management	The N dynamics following clear felling, focusing on NO3- turnover, were studied at four forested sites in southern Sweden. Two different methods were used to study N availability: (i) an in vivo nitrate reductase activity (NRA) bioassay and (ii) measurements of natural abundance of stable N isotopes in leaves of the grass species Deschampsia flexuosa, and in organic soil horizons. At each of the …	2002	160	2019-01-03	273-280
19291	Hogbom, L., Nohrstedt, H. O., Lundstrom, H. and Nordlund, S.	Soil conditions and regeneration after clear felling of a Pinus sylvestris L. stand in a nitrogen experiment, Central Sweden	Plant and Soil	Forest N fertilization is a common practice in areas of Sweden that are not affected by high levels of N deposition. The environmental consequences of high N input to closed forests are fairly well known, but the long-term effects following clear-felling are a lot less well known. Thus, residual effects on soil and planted seedlings of previous N additions at an experimental N gradient 11 years a…	2001	233	2	241-250
19292	Hogstrom, U. and Smedman, A. S.	Accuracy of sonic anemometers: Laminar wind-tunnel calibrations compared to atmospheric in situ calibrations against a reference instrument	Boundary-Layer Meteorology	Two Gill Solent Ultrasonic anemometers, models 1012R2 and 1210R3, were tested in field parallel measurements against a windvane based hot-film anemometer with additional sensors for temperature and wet-bulb temperature, the MIUU (MIUU: Meteorology Institute, Uppsala University) instrument. This instrument was shown to retain its precision from laminar wind-tunnel tests when used in atmospheric tu…	2004	111	1	33-54
19293	Hokka, Hannu, Hytonen, Jyrki and Saarinen, Markku	The effect of scalping on seedling establishment after seed tree cutting of Scots pine stands in drained peatlands in northern Finland	Scandinavian Journal of Forest Research	We studied the establishment of natural seedlings after seed tree cutting and scalping in two drained Scots pine peatland stands in northern Finland (Simo and Sievi). Approximately, 50ha(-1) of Scots pine stems were retained on both sites. During the six subsequent years, five seedling surveys were conducted. The effect of site preparation was analysed using generalized linear mixed models (GLMM)…	2016	31	2	166-174
19294	Hokka, Hannu, Hyttinen, Heli, Marttila, Hannu, Jamsen, Juha and Klove, Bjorn	Effect of Peak Runoff Control Method on Growth of Scots Pine Stands on Drained Peatlands in Central Finland	Silva Fennica	In drained peatland forests ditch networks need regular maintenance operations in order to sustain their drainage capacity. These operations however have a significant impact on the quality of the runoff water from the ditched areas. Peak runoff control (PRC) method has been proposed as a possible method to diminish the load to water courses through retention of the runoff temporarily in the ditc…	2011	45	3	331-339
19295	Hole, Lars R.	Influence of climate variability on reactive nitrogen deposition in temperate and Arctic climate	Book		2010
19296	Holmboe, N., Kristensen, E. and Andersen, F. O.	Anoxic decomposition in sediments from a tropical mangrove forest and the temperate Wadden Sea: Implications of N and P addition experiments	Estuarine Coastal and Shelf Science	The anoxic decomposition processes in sediments from a tropical mangrove forest (Bangrong, Thailand) and a salt marsh in the temperate Wadden Sea (Denmark) were compared, and the effects of increased ammonium and/or phosphate concentrations on the anoxic decomposition were studied. Sediment was incubated in jars (20-ml glass vials) and changes in porewater solutes were followed in a time series o…	2001	53	2	125-140
19297	Holmstrom, E., Hjelm, K., Johansson, U., Karlsson, M., Valkonen, S. and Nilsson, U.	Pre-commercial thinning, birch admixture and sprout management in planted Norway spruce stands in South Sweden	Scandinavian Journal of Forest Research	Early management of the regenerated seedlings shapes the future stand properties. To address these issues, pre-commercial thinning (PCT) and control treatments were applied to planted Norway spruce (Picea abies L. Karst) and naturally regenerated birch (Betula pendula Roth., Betula pubescens Ehrh.) stands in forest experiments in southern Sweden (lat. 56-57 N) containing 1.1-5.5 m tall saplings. …	2016	31	1	56-65
19298	Holopainen, I. J.	THE EFFECTS OF LOW PH ON PLANKTONIC COMMUNITIES - CASE-HISTORY OF A SMALL FOREST POND IN EASTERN FINLAND	Annales Zoologici Fennici	The pH of a small (0.13 ha), natural forest pond in eastern Finland decreased from > 6.0 to 4.0 during a dry summer. The cause of the acidification is unknown, but may have been localized groundwater acidification due to oxidation of sulfide compounds in the soil. The species composition and biomass of the phyto- and zooplankton during this period are reported and compared to those of a larger, c…	1991	28	2	95-103
19299	Holopainen, I. J. and Oikari, A.	ECOPHYSIOLOGICAL EFFECTS OF TEMPORARY ACIDIFICATION ON CRUCIAN CARP, CARASSIUS-CARASSIUS (L) - A CASE-HISTORY OF A FOREST POND IN EASTERN FINLAND	Annales Zoologici Fennici	During a dry summer, the PH of a small (0.13 ha), natural forest pond in eastern Finland decreased from > 6.0 to 4.0, returning to normal the following winter. Experimental lowering of the pH, using a strong acid, in a laboratory water-sediment system and in pond water revealed qualitatively similar changes to those in the naturally acidified pond: decreases in-water colour, dissolved organic mat…	1992	29	1	29-38
19300	Holten, N. E. and Diest, W. von	Change in social class in Danish oak stands - a study on growth and financial returns of individual trees	Forstarchiv	Data (dating back to AD 1893 in one case) on growth of oak [Quercus robur] in Bregentved (Sjaelland) and Wedellsborg (Fyn) forest districts, Denmark, are tabulated and analysed. Stem diameter increment, growth trends and changes in tree rank were used as indicators of economic potential. Tree social class changes occurred in all sample plots, corresponding to changes in diameter rank. Most change…	1996	67	4	160-174
19301	Hong, Bongghi, Swaney, Dennis P., McCrackin, Michelle, Svanback, Annika, Humborg, Christoph, Gustafsson, Bo, Yershova, Alexandra and Pakhomau, Aliaksandr	Advances in NANI and NAPI accounting for the Baltic drainage basin: spatial and temporal trends and relationships to watershed TN and TP fluxes	Biogeochemistry	In order to assess the progress toward eutrophication management goals, it is important to understand trends in land-based nutrient use. Here we present net anthropogenic nitrogen and phosphorus inputs (NANI and NAPI, respectively) for 2000 and 2010 for the Baltic Sea watershed. Overall, across the entire Baltic, between the 5-year periods centered on 2000 and 2010, NANI and NAPI decreased modest…	2017	133	3	245-261
19302	Hopmans, Peter and Elms, Stephen R.	Impact of defoliation by Essigella californica on the growth of mature Pinus radiata and response to N, P and S fertilizer	Forest Ecology and Management	A study of responses of radiata pine (Pinus radiata D. Don) to fertilizer applied after thinning and the impact of repeated infestations of the Monterey pine aphid (Essigella californica Essig.) over 12 years showed that the defoliation of upper crowns was exacerbated by nutrient deficiencies of P and S. Remedial treatment with NPS fertilizers in 1997 and 2003 improved average retention of foliag…	2013	289		190-200
19303	Horntvedt, R.	CROWN DENSITY OF SPRUCE TREES RELATED TO NEEDLE BIOMASS	Forest Ecology and Management	Several monitoring programmes for the 'new forest damage' in Europe are based on visual assessment of crown density. In this report crown density is related to measured crown characteristics. The material comprised 100 old and 25 young Norway spruce trees visually assessed by crown density relative to a fully-foliaged tree. All branches were recorded by diameter class, and branch weight, needle w…	1993	59	2019-03-04	225-235
19304	Horntvedt, R. and Robak, H.	Relative susceptibility of eleven conifer species to fluoride air pollution	Meddelelser fra Norsk Institutt for Skogforskning	Needle injuries (tip-burn and shedding) to 15-year-old trees in a field experiment 10 km from an aluminium smelter have been evaluated. Larix decidua was most resistant, followed by Tsuga heterophylla. Less resistant were Pseudotsuga menziesii, Abies spp., Picea spp. and Pinus sylvestris. Individual variation was especially high in the Picea species. Needle shedding was most pronounced in Abies c…	1975	32	5	185-206
19305	Horosajlov, N. G.	Ecogeographical laws of variability in populations of red clover	Trud. priklad. Bot. Genet. Selekc. (Bull. appl. Bot. Gen. Pl.-Breed.)	As early as 1765 the literature contained references to two different types of red clover, the short early and the tall late. Attempts to establish specific differences for European forms (Trifolium sativum), American (T. expansum) and wild (T. pratense) are considered unfounded, as the one can easily be converted into the other by the effects of selection. Wild clovers have repeatedly been taken…	1964	36	2	14-58
19306	Hoyas, T. R., Vagstad, N., Bechmann, M. and Eggestad, H. O.	Nitrogen budget in the river Auli catchment: a catchment dominated by agriculture, in southeastern Norway	Ambio	An intensive study on N inputs and losses was carried out in six sub-catchments and the main catchment of the river Auli (366 km) in southeastern Norway, from 1992 to 1995. Total N transport in the main river outlet was 20.6, 19.1 and 26.5 kg N/ha per year, respectively, for the agrohydrological years 1992/93 to 1994/95. Approximately 85% of the total input of N to the catchment area was related …	1997	26	5	289-295
19307	Hu, J.	Effects of harvesting coniferous stands on site nutrients, acidity and hydrology	Book	The overall aim of this work was to study the effects of different harvest regimes on the nutrients and acidification of forest soil and soil water in Norwegian spruce (Picea abies) stands, southeastern Norway, and to provide constructive suggestions for alternative forest management. The harvest regimes included clear-cutting, thinning and untouched control. The hydrological responses of a Chine…	2000
19308	Huang, J. H. and Matzner, E.	Biogeochemistry of organotin compounds and tin in a forested catchment in Germany	Science of the Total Environment	Organotin compounds (OTC) are highly toxic pollutants that have been shown to affect many aquatic ecosystems. Little is known about the input and fate of OTC in terrestrial ecosystems. Here, soil pools, concentrations and fluxes in bulk precipitation, throughfall, fog, litterfall and runoff of OTC and Sn-total were investigated in a forested ecosystem (Picea abies, Karst.) in NE Bavaria, Germany.…	2004	332	2019-01-03	231-241
19309	Huang, Jen-How and Matzner, Egbert	Fluxes of inorganic and organic arsenic species in a Norway spruce forest floor	Environmental Pollution	To identify the role of the forest floor in arsenic (As) biogeochemistry, concentrations and fluxes of inorganic and organic As in throughfall, litterfall and forest floor percolates at different layers were investigated. Nearly 40% of total As-total input (5.3 g As ha(-1) yr(-1)) was retained in Oi layer, whereas As-total fluxes from Oe and Oa layers exceeded the input by far (10.8 and 20 g As h…	2007	149	2	201-208
19310	Huang, Zheng and Ma, Weimin	On the quench of a debris bed in the lower head of a Nordic BWR by coolant injection through control rod guide tubes	Nuclear Engineering and Design	Since the reactor pressure vessel (RPV) of a typical BWR features a lower head that is penetrated by a forest of control rod guide tubes (CRGTs), coolability of the debris bed formed in the lower head during a severe accident can be realized by coolant injection through the CRGTs (so-called "CRGT cooling"). This paper is concerned with performance assessment of such CRGT cooling system, whose hea…	2019	351		189-202
19311	Huber, Christian, Baier, Roland, Goettlein, Axel and Weis, Wendelin	Changes in soil, seepage water and needle chemistry between 1984 and 2004 after liming an N-saturated Norway spruce stand at the Hoglwald, Germany	Forest Ecology and Management	In 1984, a liming experiment with a surface application of 4 t ha(-1) of dolomitic limestone was started at the acidic N-saturated Norway spruce forest "Hoglwald" in southern Germany and monitored until 2004. The decay of surface humus due to the accelerated mineralisation accounted for 18.5 +/- 2.7 t ha(-1) C or 50% of the initial pool and 721.6 +/- 115.0 kg ha(-1) N or 46% for N. Due to some tr…	2006	233	1	2019-11-20
19312	Huber, Sandra, Remberger, Mikael, Kaj, Lennart, Schlabach, Martin, Jorundsdottir, Hronn O., Vester, Jette, Arnorsson, Mimir, Mortensen, Inge, Schwartson, Richard and Dam, Maria	A first screening and risk assessment of pharmaceuticals and additives in personal care products in waste water, sludge, recipient water and sediment from Faroe Islands, Iceland and Greenland	Science of the Total Environment	A screening of a broad range of pharmaceuticals and additives in personal care products (PPCPs) in sub-arctic locations of the Faroe Islands (FO), Iceland (IS) and Greenland (GL) was conducted. In total 36 pharmaceuticals including some metabolites, and seven additives in personal care products were investigated in influent and effluent waters as well as sludge of waste water treatment plants (WW…	2016	562		13-25
19313	Hudson, M. S. and Henriksson, S. T.	The oscillating pressure method of wood impregnation	Forest Products Journal	A method for the preservative impregnation of woods resistant to treatment by the usual pressure processes is fully described, with a discussion of the underlying physical principles involved. It is based on rapid cycling of pressure and vacuum to secure penetration of preservative salts in aqueous solution into unseasoned wood. Pressure is oscillated [34, p. 689] between 115 Ib. sq. in. and 28 i…	1956	6	10	381-386
19314	Hultberg, H., Lee, Y. H., Nystrom, U. and Nilsson, S. I.	Chemical effects on surface-, ground- and soil-water of adding acid and neutral sulphate to catchments in southwest Sweden	Book	The effects of acid sulfate and neutral sulfate on surface-, ground- and soil-water were investigated by applying elemental sulfur (acidic sulfate) and sodium sulfate (neutral sulfate) in 1985 and 1986 to two forested catchments in the Gardsjon area of southwest Sweden. The chemical concn in the runoff water were linearly interpolated in time and multiplied by the daily mean water runoff to give …	1990
19315	Huotari, Noora, Tillman-Sutela, Eila and Kubin, Eero	Ground vegetation has a major role in element dynamics in an ash-fertilized cut-away peatland	Forest Ecology and Management	In Finland, recycling of wood-ash as a fertilizer has been widely studied in recent decades in peatlands drained for forestry. Wood-ash is reported to promote tree growth without any significant negative impacts on the environment and could, therefore, be a suitable option on cut-away peatlands, which are estimated to increase by 30,000 ha over the next ten years. However, the environmental effec…	2011	261	11	2081-2088
19316	Huserbraten, M. B. O., Moland, E. and Albretsen, J.	Cod at drift in the North Sea	Progress in Oceanography	There has been a large-scale geographical re-distribution of the North Sea cod stock over the past century, and recent surveys indicate a north-eastern modal distribution. Here we assess the consequences of the contemporary distribution of North Sea cod (Gadus morhua) spawning biomass to inter-ocean recruitment potential. By simulations of drifting cod eggs and larvae spawned in the northern Nort…	2018	167		116-124
19317	Huttl, R. F., Orlovius, K. and Vonschenck, B.	MEASUREMENT OF ELECTRICAL-RESISTANCE IN THE CAMBIUM OF FERTILIZED AND UNFERTILIZED SPRUCES	Forstwissenschaftliches Centralblatt		1990	109	4	190-199
19318	Hylander, K.	Aspect modifies the magnitude of edge effects on bryophyte growth in boreal forests	Journal of Applied Ecology	1. The increased length of forest clear-cut edges is considered to be one of the main ecological consequences of silviculture. The effects vary over the landscape, and studies have shown that aspect is one important factor determining the extent of microclimatic edge effects across forest clear-cut boundaries. However, little is known about the relationship between contrasts in microclimate at ed…	2005	42	3	518-525
19319	Hylander, Kristoffer	The response of land snail assemblages below aspens to forest fire and clear-cutting in Fennoscandian boreal forests	Forest Ecology and Management	Species can persist in a landscape with recurrent disturbances either through local survival or by dispersing to sites of a preferred successional stage. This study investigated in what extent forest floor dwelling land snails survived forest fires and clear-cutting. Snail fauna in LFH (litter, fermenting litter and humus) samples below retained aspen trees in disturbed areas were compared with s…	2011	261	11	1811-1819
19320	Hylander, K., Nilsson, C. and Gothner, T.	Effects of buffer-strip retention and clearcutting on land snails in boreal riparian forests	Conservation Biology	We investigated the short-term effects of forest clearcutting on land snails (terrestrial gastropods) in 15 forest stands along small streams in Sweden. Two different silvicultural treatments were applied at each site: clearcutting across the stream channel and buffer strips 10 m wide on each side of the stream. Additionally, we studied 10 reference sites in unlogged riparian forests along simila…	2004	18	4	1052-1062
19321	Hylander, Kristoffer and Weibull, Henrik	Do time-lagged extinctions and colonizations change the interpretation of buffer strip effectiveness? - a study of riparian bryophytes in the first decade after logging	Journal of Applied Ecology	There is a risk that short-term studies either underestimate disturbance effects because of time-lagged responses, including both time-lagged extinctions and colonizations, or overestimate them because of fast recovery. To evaluate the conservation effectiveness of tree group retention (in this case, buffer strips along streams), we studied the bryophyte community once prior to, and twice after l…	2012	49	6	1316-1324
19322	Hylen, Gro and Granhus, Aksel	A probability model for root and butt rot in Picea abies derived from Norwegian national forest inventory data	Scandinavian Journal of Forest Research	Root rot in Norway spruce (Picea abies (L.) Karst.) causes substantial economic losses to the forestry sector. In this study, we developed a probability model for decay at breast height utilizing 18,141 increment cores sampled on temporary plots of the Norwegian National Forest Inventory. The final model showed a good fit to the data and retained significant relationships between decay and a suit…	2018	33	7	657-667
19323	Hynninen, Anu, Fritze, Hannu, Sarkkola, Sakari, Kitunen, Veikko, Nousiainen, Hannu, Silvan, Niko, Laine, Jukka, Tervahauta, Arja and Nieminen, Mika	N2O Fluxes from Peatland Buffer Areas after High N Loadings in Five Forested Catchments in Finland	Wetlands	Peatlands are becoming increasingly used as buffer areas to reduce nutrient transport into watercourses, but knowledge on the dynamics of the element cycle, particularly in gas phase is scant. We investigated if peatland buffer areas significantly contribute to emissions of nitrous oxide (N2O) from forested catchments. We used an artificial addition of 150 kg NH4NO3 per buffer area (146-750 kg NH…	2011	31	6	1067-1077
19324	Hynninen, Anu, Hamberg, Leena, Nousiainen, Hannu, Korpela, Leila and Nieminen, Mika	Vegetation composition dynamics in peatlands used as buffer areas in forested catchments in southern and central Finland	Plant Ecology	Peatland buffer areas are important means in reducing sediment and nutrient loading from discharge waters in a variety of landscapes; however, use of natural mires as buffer areas may induce unwanted changes in the plant species composition. Vegetation composition dynamics were studied at one rewetted peatland and two natural peatlands used as buffer areas in forested catchments in southern and c…	2011	212	11	1803-1818
19325	Hynninen, Anu, Sarkkola, Sakari, Lauren, Ari, Koivusalo, Harri and Nieminen, Mika	Capacity of riparian buffer areas to reduce ammonium export originating from ditch network maintenance areas in peatlands drained for forestry	Boreal Environment Research	It is currently recommended to use buffer areas in reducing nutrient export from forested areas to water courses. Nutrient retention in buffer areas has been studied mostly by using artificial nutrient additions, hence information is needed from areas where the increased export originates from an actual forestry practice. We investigated the capacity of riparian buffer areas to reduce the ammoniu…	2011	16	5	430-440
19326	Hytonen, Jyrki, Hokka, Hannu and Saarinen, Markku	The Effect of Site Preparation on Seed Tree Regeneration of Drained Scots Pine Stands in Finland	Baltic Forestry	We studied the success of natural regeneration for eight years after seed tree cutting on four drained peatland Scots pine stands in central and northern Finland (Parkano, Sievi, Vaala, Simo) when retaining ca. 50 Scots pine sterns ha(-1) followed by site preparation. The total number and the number of crop seedlings and their mean height were investigated by species and methods of site preparati…	2019	25	1	132-140
19327	Hytteborn, Julia K., Temnerud, Johan, Alexander, Richard B., Boyer, Elizabeth W., Futter, Martyn N., Froberg, Mats, Dahne, Joel and Bishop, Kevin H.	Patterns and predictability in the intra-annual organic carbon variability across the boreal and hemiboreal landscape	Science of the Total Environment	Factors affecting total organic carbon (TOC) concentrations in 215 watercourses across Sweden were investigated using parameter parsimonious regression approaches to explain spatial and temporal variabilities of the TOC water quality responses. We systematically quantified the effects of discharge, seasonality, and long-term trend as factors controlling intra-annual (among year) and inter-annual …	2015	520		260-269
19328	Hyvarinen, E., Kouki, J. and Martikainen, P.	Fire and green-tree retention in conservation of red-listed and rare deadwood-dependent beetles in Finnish boreal forests	Conservation Biology	Habitat loss, fragmentation, and declining habitat quality have created an extinction debt in boreal forests, which could be partly reversed by deliberately improving the habitat quality in managed areas outside reserves. We studied the effects of green-tree retention and controlled burning on red-listed and rare, deadwood-dependent (saproxylic) beetles in a large-scale field experiment in easter…	2006	20	6	1710-1719
19329	Hyvarinen, E., Kouki, J., Martikainen, P. and Lappalainen, H.	Short-term effects of controlled burning and green-tree retention on beetle (Coleoptera) assemblages in managed boreal forests	Forest Ecology and Management	Timber harvesting, and especially clear-cutting followed by soil scarification, has altered boreal forest ecosystems in important ways. For example, loss of decaying wood in many parts of boreal forests has reduced habitats for saproxylic species. Several methods have recently been introduced, however, to reduce the negative impacts of forestry on the natural biota. Use of controlled burning and …	2005	212	2019-01-03	315-332
19330	Hyvarinen, Esko, Kouki, Jari and Martikninen, Petri	Fire and green-tree retention in conservation of red-listed and rare deadwood-dependent beetles in Finnish boreal forests	Conservation Biology	Habitat loss, fragmentation, and declining habitat quality have created an extinction debt in boreal forests, which could be partly reversed by deliberately improving the habitat quality in managed areas outside reserves. Me studied the effects of green-tree retention and controlled burning on red-listed and rare, deadwood-dependent (saproxylic) beetles in a large-scale field experiment in easter…	2006	20	6	1711-1719
19331	Hyvarinen, M., Roitto, M., Ohtonen, R. and Markkola, A.	Impact of wet deposited nickel on the cation content of a mat-forming lichen Cladina stellaris	Environmental and Experimental Botany	The impact of experimentally sprayed aqueous nickel solution on the concentrations of potassium, calcium, magnesium and nickel in three horizontal strata (top, 0-20 mm; middle, 20-40 mm; and base, 40-60 mm) of the cushion-forming lichen Cladina stellaris was investigated. The experimental nickel deposition range used corresponded with that from the pristine forests of the Finnish border to pollut…	2000	43	3	211-218
19332	Hyvonen, Riitta, Kaarakka, Lilli, Leppalammi-Kujansuu, Jaana, Olsson, Bengt A., Palviainen, Marjo, Vegerfors-Persson, Birgitta and Helmisaari, Helja-Sisko	Effects of stump harvesting on soil C and N stocks and vegetation 8-13 years after clear-cutting	Forest Ecology and Management	Effects of stump harvesting on coarse woody debris (CWD), soil and vegetation were investigated 8-13 years after clear-cutting of eight forest stands located at two sites, Honkola and Haukilahti, in Central Finland. Norway spruce (Picea abies) was the dominant tree species in the harvested stands. Four of the stands were subjected to mounding and four were stump-harvested. Logging residues were r…	2016	371		23-32
19333	Hyytiainen, K., Ilomaki, S., Makela, A. and Kinnunen, K.	Economic analysis of stand establishment for Scots pine	Canadian Journal of Forest Research-Revue Canadienne De Recherche Forestiere	Experimental data, a process-based forest growth model, and stand-level economic optimization were combined to investigate financial returns from investments for establishing Scots pine (Pinus sylvestris L.) stands in southern Finland. Four regeneration methods (planting, sowing, and natural regeneration with 25 or 100 seed trees center dot ha(-1)) and three intensities of soil preparation (unpre…	2006	36	5	1179-1189
19334	Hyytiainen, Kari and Penttinen, Markku	Applying portfolio optimisation to the harvesting decisions of non-industrial private forest owners	Forest Policy and Economics	The non-industrial private forest owner's optimal harvesting and investment strategies are studied at forest holding level by including individual forest stands in an asset class portfolio. The forest owner can either clearcut mature stands and invest the capital in financial or real asset classes (bank deposits, government bonds, stocks, apartments) or postpone clearcutting and retain capital in…	2008	10	3	151-160
19335	Ievin, I. K. and Savel'ev, A. G.	The technique for thinnings in Group I forests in Latvia	Lesnoe Khozyaistvo	The advantages and disadvantages of various methods of thinning are considered for Group I forests, i.e. shelterbelts, amenity and green-belt forests. The thinnings were carried out as regular or irregular selective thinnings, with various combinations of feller-bunchers, chain saws, harvesters, winches, specialized tractors, and forwarders. Some data are tabulated on output and damage to the res…	1986		11	31-34
19336	Ilek, Anna, Kucza, Jaroslaw and Morkisz, Karolina	Hygroscopicity of the bark of selected forest tree species	Iforest-Biogeosciences and Forestry	As the outer layer of trees and shrubs, bark is exposed to the direct action of atmospheric conditions and reacts to changes in relative air humidity. This study focuses on the actual hygroscopicity of the bark, regarded as a component of the total bark retention capability. The main research aims were to: (1) determine the physical properties (specific density, bulk density, total porosity), act…	2017	10		220-226
19337	Ilnicki, Piotr, Gorecki, Krzysztof, Lewandowski, Piotr and Farat, Ryszard	LONG-TERM VARIABILITY OF TOTAL NITROGEN AND TOTAL PHOSPHORUS CONCENTRATION AND LOAD IN THE SOUTH PART OF THE BALTIC SEA BASIN	Fresenius Environmental Bulletin	A high decrease was observed in concentrations and loads of nitrogen and phosphorus discharged from the Warta River (catchment area 54 519 km(2)) to the Oder (catchment area 119 074 km(2)). One half of the monitoring stations are strongly influenced by point sources, which allows for verifying the functioning of sewage treatment plants. Nitrogen compound concentrations are positively correlated w…	2016	25	10	3923-3940
19338	Ilnicki, Piotr, Gorecki, Krzysztof, Lewandowski, Piotr and Farat, Ryszard	LONG-TERM VARIABILITY OF TOTAL NITROGEN AND TOTAL PHOSPHORUS CONCENTRATION AND LOAD IN THE SOUTH PART OF THE BALTIC SEA BASIN	Fresenius Environmental Bulletin	A high decrease was observed in concentrations and loads of nitrogen and phosphorus discharged from the Warta River (catchment area 54 519 km(2)) to the Oder (catchment area 119 074 km(2)). One half of the monitoring stations are strongly influenced by point sources, which allows for verifying the functioning of sewage treatment plants. Nitrogen compound concentrations are positively correlated w…	2016	25	6	1892-1909
19339	Imbeau, L., Savard, J. P. L. and Gagnon, R.	Comparing bird assemblages in successional black spruce stands originating from fire and logging	Canadian Journal of Zoology-Revue Canadienne De Zoologie	Comparisons of the effects of logging and fire as disturbance agents on the composition of bird assemblages in boreal ecosystems are still lacking or are limited to the short-term impacts of clear-cutting. In Quebec, where the boreal forest is largely dominated by black spruce (Picea mariana (Mill.) B.S.P.) stands, we surveyed 140 point-count stations in 3 postlogging and 4 postfire development s…	1999	77	12	1850-1860
19340	Imby, L. and Palmqvist, G.	Appearance, biology and spread of the Swedish species of Anomogyna (Lep., Noctuidae)	Entomologisk Tidskrift	Six species of noctuids have been included in the genus Anomogyna in Sweden, and for the purpose of this paper the authors retain them in it, though more recent work would include them in Xestia. They inhabit coniferous forests, and the larvae feed on blueberry (Vaccinium) and other plants of the forest floor. They form a homogeneous group, and descriptions of their various stages (with special r…	1978	99	2019-03-04	97-107
19341	Ingerpuu, N., Vellak, K., Liira, J. and Partel, M.	Relationships between species richness patterns in deciduous forests at the north Estonian limestone escarpment	Journal of Vegetation Science	The flora of the deciduous forests at the base of the north Estonian limestone escarpment is species rich, with an exceptionally high number of rare bryophyte species. Relationships between species richness of bryophyte and herb layers and biotic and environmental conditions were studied, using General Linear Mixed Models. Human disturbance (waste deposit, tree damage etc) was significantly negat…	2003	14	5	773-780
19342	Ingerslev, Morten, Skov, Simon, Sevel, Lisbeth and Pedersen, Lars Bo	Element budgets of forest biomass combustion and ash fertilisation - A Danish case-study	Biomass & Bioenergy	Harvest of forest biomass for energy production may lead to a significant export of nutrients from the forest. Ash spreading and recycling of nutrients from wood chip combustion to the forest has come into focus as a means for counteracting the nutrient export. This study was carried out to examine the retention of various elements in the different ash fractions and utilise the nutrient recovery …	2011	35	7	2697-2704
19343	Insinna, P., Jalkanen, R. and Linde, A.	Detection of historical defoliations of Pinus sylvestris with dendrochronological methods	Mitteilungen der Deutschen Gesellschaft fur allgemeine und angewandte Entomologie	In the past, historical insect outbreaks in forest stands could not be detected unless exact documentations and records, e.g. by the forest service, existed. The recently developed Needle Trace Method (NTM) allows to assess past needle retention of conifers retrospectively, over the tree's lifetime. This destructive method requires the felled sample trees to be cut into pieces by removing the bra…	2004	14	2019-01-06	249-252
19344	Irwin, Sandra, Kelly, Daniel L., Kelly, Thomas C., Mitchell, Fraser J. G., Coote, Linda, Oxbrough, Anne, Wilson, Mark W., Martin, Rebecca D., Moore, Karen, Sweeney, Oisin, Dietzsch, Anke C. and O'Halloran, John	DO IRISH FORESTS PROVIDE HABITAT FOR SPECIES OF CONSERVATION CONCERN?	Biology and Environment-Proceedings of the Royal Irish Academy	The importance of plantation forests for biodiversity conservation is greatest in landscapes that have experienced significant loss of natural forest ecosystems and the plantation forest estate continues to expand, as is the case in Ireland. We investigated the role of plantation forests in supporting forest plants, invertebrates and birds of conservation concern in comparison to semi-natural woo…	2013	113B	3	273-279
19345	Isoaho, P., Lauhanen, R. and Saarinen, M.	Effects of continuous ditch network maintenance on the condition of forest drainage areas in Central Ostrobothnia district	Suo	The effects of light manual ditch network maintenance on the dimensions and the conditions of ditches and on the development of tree stands on ditched sites were studied in 3 drainage areas of Central Ostrobothnia, Finland, 33-61 years after drainage. The original ditches had retained their drainage effect. Of these ditches, 12% were in a rather poor condition and <1% were in a poor condition. Th…	1993	44	2	33-41
19346	Jacks, G., Joelsson, A. and Fleischer, S.	NITROGEN-RETENTION IN FOREST WETLANDS	Ambio	Forests in southern Sweden are receiving nitrogen depositions that are about twice the critical load. There are indications that nitrogen losses from forest land are increasing. Forest wetlands may in this perspective become important traps for nitrogen, thus, protecting streams, lakes and marine environments from eutrophication. A number of forest wetlands in southwestern Sweden have been invest…	1994	23	6	358-362
19347	Jacks, G. and Norrstrom, A. C.	Hydrochemistry and hydrology of forest riparian wetlands	Forest Ecology and Management	Forest stream riparian wetlands have a number of important features. This investigation treats one aspect, the nitrogen retention after upland clear-cutting which leads to elevated nitrate leaching, and the importance of the flow pathways in this connection. The runoff occurs mainly via the upper permeable section of the peat while the lower peat act as an aquitard, restricting the flow from the …	2004	196	2019-02-03	187-197
19348	Jackson, Benjamin G., Nilsson, Marie-Charlotte and Wardle, David A.	The effects of the moss layer on the decomposition of intercepted vascular plant litter across a post-fire boreal forest chronosequence	Plant and Soil	Feather mosses form a thick ground layer in boreal forests that can intercept incoming litter fall. This interception may influence the decomposition of incoming litter but this has been little explored. We investigated how the moss layer influences decomposition of intercepted litter along a 362-year fire driven forest chronosequence in northern Sweden across which soil fertility declines. We pl…	2013	367	2019-01-02	199-214
19349	Jacobs, Joshua M., Spence, John R. and Langor, David W.	Variable retention harvest of white spruce stands and saproxylic beetle assemblages	Canadian Journal of Forest Research-Revue Canadienne De Recherche Forestiere	Dead wood dependent (saproxylic) insects have been identified as vulnerable to the effects of modern forestry practices. We examined the effects of variable retention harvesting on saproxylic beetle assemblages. Variable retention of living green trees seeks to leave more forest structure on the landscape with the goal of maintaining ecosystem function and biodiversity. Ninety flight-intercept tr…	2007	37	9	1631-1642
19350	Jacobson, Staffan, Hogbom, Lars, Ring, Eva and Nohrstedt, Hans-Orjan	The distribution of logging residues and its impact on seedling establishment and early plant growth in two Norway spruce stands	Scandinavian Journal of Forest Research	In Fennoscandia, logging residues (LR) are increasingly being harvested to provide fuel for renewable energy. However, the removal of LR is thought to lead to decreased growth in the next generation of trees. The effect on tree growth has generally been obtained by comparing the total removal of residues with retained residues spread evenly on the ground. With current clear-cutting practices, res…	2017	32	2	134-141
19351	Jacobson, S., Hogbom, L., Ring, E. and Nohrstedt, H. O.	Effects of wood ash dose and formulation on soil chemistry at two coniferous forest sites	Water Air and Soil Pollution	Harvesting stem biomass from the forest inevitably involves exporting nutrients from the ecosystem. The amount exported is increased when the logging residues are also removed for use as fuel. Recycling of the resulting wood ash has been advocated as a measure to compensate for the nutrient losses and to sustain future forest production. The physical formulation of the wood ash may have an import…	2004	158	1	113-125
19352	Jagodzinski, Andrzej M. and Oleksyn, Jacek	Ecological consequences of silviculture at variable stand densities. I. Stand growth and development	Sylwan	The main goal of this review was to characterize ecological consequences of growing trees at variable stand densities. We found that the majority of studies were focused on biometry productivity and mortality of trees, and wood quality and its economic value, while the influence of stand density on biomass allocation, abiotic and biotic factors, chemistry of different tree organs, diversity and b…	2009	153	2	75-85
19353	Jahn, E. and Schimitschek, G.	Effects of clearing forest for pasture or hay meadows upon the soil and its fauna	Mitteilungen aus der Forstlichen Bundesversuchsanstalt, Mariabrunn	Gives the results of investigations in 1948 and 1950 on two soil types-limestone brown earths and rendzinas-in the Lechtal, Austrian Tirol. Samples were taken for quantitative study of the soil fauna; in addition, certain physical properties of the soils were determined, and samples were examined under the microscope to estimate the form, degree of decomposition and quantity of humus present and …	1952	48		112-46
19354	Jain, J. C. and Cedercreutz, U.	A study on the toxicity of some water soluble wood preservatives to wood destroying fungi	Indian Forester	Describes tests made at the Forest Research Laboratory, Malleswaram, on a combined fire-proofing and preservative agent (a) developed in India and containing CuSO, sub(4)>, H3BO3, ZnCl2, and Na2Cr2O7 in the ratio 1/3/5/6; Ascu (b) and Boliden K-33 (c) were also tested for comparison. The test fungi were Poria vaporaria, Coniophora cerebella and Lentinus lepideus. Test data are given in detail. Mo…	1961	87	11	678-91
19355	Jakobsson, R. and Elfving, B.	Development of an 80-year-old mixed stand with retained Pinus sylvestris in northern Sweden	Forest Ecology and Management	Retention of live and dead trees in harvested stands has become a common practice in Scandinavian forestry. We examined how retained Scots pines (Pinus sylvestris L.) grow and to what extent they compete with the new generation. In a mixed stand of about 5 ha in Northern Sweden, 44 retained pines and adjacent growth of the new stand was measured for the last 90 years. After liberation in 1912, th…	2004	194	2019-01-03	249-258
19356	Jalkanen, R.	Fluctuation in the number of needle seas and needle shed in Pinus sylvestris	Scandinavian Journal of Forest Research	Number of needle sets and needle shed dynamics along the stem and branches of young Scots pines (Pinus sylvestris L.), growing on four dry upland sites and one moist upland site, were monitored annually for 10 years in five stands near the Arctic Circle in northern Finland. Standwise, number of needle sets varied in the summers of 1987-1997 between 3.9 and 6.2 needle sets along the branches and b…	1998	13	3	284-291
19357	Jalkanen, R., Aalto, T. and Kurkela, T.	THE USE OF NEEDLE-TRACE METHOD (NTM) IN RETROSPECTIVELY DETECTING LOPHODERMELLA NEEDLE-CAST EPIDEMIC	European Journal of Forest Pathology	The recently developed needle-trace method (NTM) was successfully used to verify retrospectively the occurrence of a well-documented needle-cast epidemic caused by Lophodermella sulcigena in the 5-year period of 1977-1981 in a stand of Pinus sylvestris.	1994	24	2019-06-07	376-385
19358	Jalkanen, R., Aalto, T. and Kurkela, T.	DEVELOPMENT OF NEEDLE RETENTION IN SCOTS PINE (PINUS-SYLVESTRIS) IN 1957-1991 IN NORTHERN AND SOUTHERN FINLAND	Trees-Structure and Function	The needle trace method was used to study retrospectively the long-term latitudinal variation in needle retention in Scots pine (Pinus sylvestris L.) in Finland. The mean annual summer needle retention (ANR) along the main stem varied from 3.4 to 6.0 needle sets during the period 1957-1991. The lowest values were observed in southern and the highest in northern Finland. The length of the growing …	1995	10	2	125-133
19359	Jalkanen, R., Aalto, T. and Kurkela, T.	Revealing past needle density in Pinus spp	Scandinavian Journal of Forest Research	The number of short shoots per shoot length, or needle density, is species typical, and it shows year-to-year variation within species. By modification of the needle trace method, long-term needle density chronology was produced in a Scots pine (Pinus sylvestris L.) stand, located at the northern timberline in Finland. Treewise, needle density varied between 9 and 14 short shoots per long shoot (…	1998	13	3	292-296
19360	Jalkanen, R., Aalto, T. and Kurkela, T.	Needle Trace Method	Metsanduslikud Uurimused	A summary is presented of the Needle Trace Method (NTM), which was developed in the late 1980s for Scots pine (Pinus sylvestris). The NTM is based on the examination of the length and location of needle traces embedded in stemwood rather than in the branchwood of a tree - a needle trace connects the stem pith to the short shoots and needles, so that the exact age of each short shoot can be estima…	2000	34		75-78
19361	Jalkanen, R., Aalto, T., Pensa, M. and Salminen, H.	Development of Scots pine in the changing environment of the Northern Boreal Zone in Finland	Book	Biotic, abiotic and anthropogenic factors commonly impact on and stress trees on a continual basis in tree-line environments. These factors may be common to the area, they may have been 'hidden' and are now becoming more important, or they are just new to the area. Trees react differently to these factors in terms of space and time. In this article we proceed to discuss some of these questions by…	2007
19362	Jalkanen, R. and Kurkela, T.	Detecting a past Lophodermella needle cast epidemic retrospectively	Book	The needle trace method was successfully used to verify retrospectively the existence of a past, but well documented, 5-year needle cast epidemic caused by Lophodermella sulcigena in 1977-81 in a Scots pine (Pinus sylvestris) stand. Fourteen 30-yr-old pine trees were felled for the studies in autumn 1993 at Loppi, southern Finland. The method revealed significantly less needle sets during the epi…	1995
19363	Jalkanen, R. and Pensa, M.	Influence of the alkaline emissions produced by the oil-shale industry on needle retention and needle age of Scots pine	Metsanduslikud Uurimused	The needle trace method was used to reveal retrospectively the needle history of Pinus sylvestris affected by long-term alkaline deposition caused by the burning of oil-shale for energy generation in Kose, NE Estonia. Three control sites - Suonenjoki, central Finland, Lehtmetsa in northern Estonia, and Wyszkow in NE Poland, representing low, medium and high levels of acidic deposition, respective…	2000	34		79-84
19364	Jalonen, J. and Vanha-Majamaa, I.	Immediate effects of four different felling methods on mature boreal spruce forest understorey vegetation in southern Finland	Forest Ecology and Management	We investigated the immediate response of mature (mean stand age 102 years) boreal spruce forest understorey vegetation to four different felling methods on 1-ha study plots in southern Finland. We hypothesized that understorey vegetation response depends on the intensity of the felling method. Vegetation was sampled before the treatments and the year following them, when resident understorey veg…	2001	146	2019-01-03	25-34
19365	Jaloviar, Peter, Saniga, Milan, Kucbel, Stanislav, Pittner, Jan, Vencurik, Jaroslav and Dovciak, Martin	Seven decades of change in a European old-growth forest following a stand-replacing wind disturbance: A long-term case study	Forest Ecology and Management	Understanding long-term successional changes in old growth forests affected by stand-replacing disturbance is particularly important in the context of contemporary changes in climate and disturbance regimes. We analyzed seven decades of succession following a stand-replacing wind disturbance (in 1947) in Badinsky prales, one of the best preserved old-growth fir-beech forests in western Carpathian…	2017	399		197-205
19366	Jamsa, Mikael, Lynch, Fiona, Santana-Sanchez, Anita, Laaksonen, Petteri, Zaitsev, Gennadi, Solovchenko, Alexei and Allahverdiyeva, Yagut	Nutrient removal and biodiesel feedstock potential of green alga UHCC00027 grown in municipal wastewater under Nordic conditions	Algal Research-Biomass Biofuels and Bioproducts	Integrating cultivation with wastewater treatment improves the economics of microalgal based biofuel production and allows for the sustainable reuse of nitrogen (N) and phosphorus (P) from waste streams. Batchcultivation of a locally isolated green microalga, UHCC00027, and an indigenous algal-bacterial consortium was undertaken on screened municipal wastewater in 24 L pilot reactors. Evaluations…	2017	26		65-73
19367	Jandl, R., Kopeszki, H., Bruckner, A. and Hager, H.	Forest soil chemistry and mesofauna 20 years after an amelioration fertilization	Restoration Ecology	Soil chemical properties and soil mesofauna composition were assessed at a forest site in northern Austria, where 20 years earlier an amelioration treatment had been performed. The site had been treated with limestone, a high P slag, and ammonium nitrate to replace the poorly growing pine (Pinus sylvestris) forest with a Norway spruce (Picea abies) stand. This treatment was at that time a common …	2003	11	2	239-246
19368	Jandl, R., Smidt, S., Mutsch, F., Furst, A., Zechmeister, H., Bauer, H. and Dirnbock, T.	Acidification and nitrogen eutrophication of Austrian forest soils	Applied and Environmental Soil Science	We evaluated the effect of acidic deposition and nitrogen on Austrian forests soils. Until thirty years ago air pollution had led to soil acidification, and concerns on the future productivity of forests were raised. Elevated rates of nitrogen deposition were believed to cause nitrate leaching and imbalanced forest nutrition. We used data from a soil monitoring network to evaluate the trends and …	2012	2012		632602-Article ID 632602
19369	Janek, M., Mank, K. and Pierzgalski, E.	Effects of retention in forest the drainage water from agricultural area	Book	The poor quality of the Baltic Sea waters is a serious environmental problem, but also negatively affects the efficiency of maritime economy and the health of the population, the development of tourism, etc. One of the important sources of the Baltic Sea pollution is agriculture. The large amounts of nitrogen and phosphorus compounds from Poland to the Baltic come from drainage systems of agricul…	2017
19370	Janke, F. and Kirk, H.	Preservative treatment of Norway spruce wood from stands in the Erzgebirge exposed to air pollution	Holztechnologie	Various assortments were prepared from trees of 4 damage classes (ranging from healthy to dead) in a 50-yr-old stand in the Tharandt State Forest Enterprise. After pressure treatment of roundwood and sawn timber with Dohnalit CKF [Cr-Cu-F], preservative uptake and penetration were 2.0-2.5* greater in wood exhibiting decay than in sound wood. After non-pressure treatment of lumber, both uptake and…	1987	28	5	259-261
19371	Jankovska, Ilze, Straupe, Inga, Brumelis, Guntis, Donis, Janis and Kupfere, Liga	Urban Forests of Riga, Latvia - Pressures Naturalness, Attitudes and Management	Baltic Forestry	The urban forest landscape in Europe differs depending on the past history of sociopolitical cultures. Latvia presents a special case, as perceptions of urban green spaces changed from a period of Germanic dominance, to a developed European Republic, later subdued in the Soviet era, and now to a European country in transition. The human footprint has been relatively moderate, and there is little …	2014	20	2	342-351
19372	Janoutova, Ruzena, Homolova, Lucie, Malenovsky, Zbynek, Hanus, Jan, Lauret, Nicolas and Gastellu-Etchegorry, Jean-Philippe	Influence of 3D Spruce Tree Representation on Accuracy of Airborne and Satellite Forest Reflectance Simulated in DART	Forests	Advances in high-performance computer resources and exploitation of high-density terrestrial laser scanning (TLS) data allow for reconstruction of close-to-reality 3D forest scenes for use in canopy radiative transfer models. Consequently, our main objectives were (i) to reconstruct 3D representation of Norway spruce (Picea abies) trees by deriving distribution of woody and foliage elements from …	2019	10	3
19373	Jansen, J.	Forestry without thinning?	Norsk Skogbruk	Recommends for certain conifer stands to replace the usual regulation of growing space and thinning with one measure, namely the pollarding at breast height of all stems (except about 1000-1200 crop trees/ha) when d.b.h. has reached about 7 cm (thus minimizing the danger of harmful fungus infections). The trees pollarded should preferably retain some green branches to ensure partial survival of s…	1986	32	2019-11-12	2019-09-09
19374	Jansson, A., Folke, C. and Langaas, S.	Quantifying the nitrogen retention capacity of natural wetlands in the large-scale drainage basin of the Baltic Sea	Landscape Ecology	We estimate the nitrogen retention capacity of natural wetlands in the 1.7 million km(2)Baltic Sea drainage basin, using a wetland GIS data base. There are approximately 138,000 km(2)of wetlands (bogs and fens) in the Baltic Sea drainage basin, corresponding to 8% of the area. The input of nitrogen to natural wetlands from atmospheric deposition was estimated to 55,000-161,000 ton y(-1) A map of …	1998	13	4	249-262
19375	Jaramillo-Correa, Juan-Pablo, Rodriguez-Quilon, Isabel, Grivet, Delphine, Lepoittevin, Camille, Sebastiani, Federico, Heuertz, Myriam, Garnier-Gere, Pauline H., Alia, Ricardo, Plomion, Christophe, Vendramin, Giovanni G. and Gonzalez-Martinez, Santiago C.	Molecular Proxies for Climate Maladaptation in a Long-Lived Tree (Pinus pinaster Aiton, Pinaceae)	Genetics	Understanding adaptive genetic responses to climate change is a main challenge for preserving biological diversity. Successful predictive models for climate-driven range shifts of species depend on the integration of information on adaptation, including that derived from genomic studies. Long-lived forest trees can experience substantial environmental change across generations, which results in a…	2015	199	3	793-+
19376	Jarvensivu, Paavo	Transforming market-nature relations through an investigative practice	Ecological Economics	Degrowth theorists and practitioners have challenged the economic growth paradigm and sought for economic, cultural and political alternatives that would respect the planetary boundaries. Their strategy has generally been to either reject the formal market system as a whole and experiment with alternative practices outside markets or suggest changes in the policies that regulate markets. They hav…	2013	95		197-205
19377	Jarvis, Juri, Ivask, Mari, Nei, Lembit, Kuu, Annely and Luud, Aarne	Effect of Green Waste Compost Application on Afforestation Success	Baltic Forestry	2012-2014The impact of soil amelioration with green waste compost in the afforestation of depleted peat fields and sand pits was studied. Drilled planting holes (50 cm deep, 20 cm in diameter, 15.7 litres in volume) were filled with fertile compost soil. Containerized yearling seedlings of Alnus glutinosa (L.) Gaertn., Betula pendula Roth and Papilla tremula (L.) x P. tremuloides Mischx. or bare …	2016	22	1	90-97
19378	Jayme, G. and Hahn, G.	The polyuronide content of some German woods, and holo- and hemi-celluloses made from them	Holzforschung	Qualitative paper chromatography showed that glucuronic acid (A) and O-methyl-glucuronic acid (B) were present in wood of Beech, Poplar (Populus X robusta), Norway Spruce, Scots Pine and Robinia. Galacturonic acid (C) was present in all the woods except Pine. The total content of uronides was 4.8% in Beech (A 1.5; B 2.3; C 1); 4.6% in Poplar (1.5; 2.1; 1.0); 3.8% in Spruce (1.7; 1.6; 0.5); 3.3% i…	1960	14	2	1952-06-01
19379	Jedvert, Kerstin, Saltberg, Anna, Lindstrom, Mikael E. and Theliander, Hans	MILD STEAM EXPLOSION AND CHEMICAL PRE-TREATMENT OF NORWAY SPRUCE	Bioresources	The aim of this work is to open up the structure of wood while retaining a large amount of hemicelluloses, in particular (galacto)glucomannans. The effects of pre-treatments on wood meal from spruce (Picea abies) with a reducing agent (NaBH4) combined with steam explosion at very mild conditions were investigated. The effects of steam explosion at 160 degrees C were studied for various residence …	2012	7	2	2051-2074
19380	Jelonek, Marek and Zygmunt, Grzegorz	'Restoring connectivity of the ecological corridor of the Biala Tarnowska River valley' - project implementation report	Przeglad Przyrodniczy	Aiming at the improvement of ecological status of water courses in the upper Vistula river basin, the Regional Water Management Authority in Krakow (RZGW) implemented the project entitled "Restoring connectivity of the ecological corridor of the Biala Tarnowska River valley": Four migration barriers were removed (in Plegna, GrybOw, Cicikowice and Kqclowa) and projects for removing impoundments on…	2017	28	4	161-169
19381	Jensen, B. and Imsgard, F.	The importance of axial penetration in relation to double vacuum treatment of window joinery	Record of the Annual Convention, British Wood Preserving Association, 1982	Decay resistance was analysed in Scots pine timber treated to Nordic Standards class B (double vacuum treatment) with tributyltin naphthenate. Such timber has been successfully used in window joinery in Denmark with virtually no instances of decay since its introduction 15 yr ago. The main factors contributing to this success include: a continuous 'shield' of preservative in all superficial layer…	1982			55-64
19382	Jensen, F. A.	Living hedges	Gartner Tidende	The advantages to nurseries and smallholdings of hedges are outlined and their planting, pruning, thinning, manuring and weed control are described, together with costs of establishment and upkeep. A diagram shows that on the leeward side of a hedge, soil and daytime air temperatures, water retention and crop yields rise, and night air temperatures, evaporation and windspeeds fall. For greenhouse…	1986	102	45	1507-1509
19383	Jensen, M. D., Ingildsen, P., Rasmussen, M. R. and Laursen, J.	Computational fluid dynamics modelling of hydraulics and sedimentation in process reactors during aeration tank settling	Water Science and Technology	Aeration tank settling is a control method allowing settling in the process tank during high hydraulic load. The control method is patented. Aeration tank settling has been applied in several waste water treatment plants using the present design of the process tanks. Some process tank designs have shown to be more effective than others. To improve the design of less effective plants, computationa…	2006	53	12	257-264
19384	Jensen, P. M.	Host seeking activity of Ixodes ricinus ticks based on daily consecutive flagging samples	Experimental and Applied Acarology	The seasonality of I. ricinus was studied by three daily consecutive flaggings in four sites situated in an ecotone between a spruce forest and a peaty meadow, a spruce forest, a beech forest and a dense spruce forest. First day flagging samples represent the most commonly used method for description of tick seasonality. Since two consecutive flaggings remove ticks in the vegetation, third day fl…	2000	24	9	695-708
19385	Jeppesen, E., Sondergaard, M., Kronvang, B., Jensen, J. P., Svendsen, L. M. and Lauridsen, T. L.	Lake and catchment management in Denmark	Hydrobiologia	The majority of Danish lakes are highly eutrophic due to high nutrient input from domestic sources and agricultural activities. Reduced nutrient retention, and more rapid removal, in catchments as a result of agricultural drainage of wetlands and lakes and channelisation or culverting of streams also play a role. Attempts have recently been made to reduce nutrient loading on lakes by intervening …	1999	395		419-432
19386	Jerabkova, Lucie, Prescott, Cindy E., Titus, Brian D., Hope, Graeme D. and Walters, Michael B.	A meta-analysis of the effects of clearcut and variable-retention harvesting on soil nitrogen fluxes in boreal and temperate forests	Canadian Journal of Forest Research-Revue Canadienne De Recherche Forestiere	One of the assumed advantages of variable-retention (VR) harvesting over clearcut harvesting is reduced post-harvest leaching losses of nitrogen. We test this assumption by synthesizing results from long-term field trials in a meta-analysis. Overall, clearcutting significantly increased soil NO3-N concentration, NO3-N as a proportion of soluble inorganic nitrogen (SIN), N concentration in leachat…	2011	41	9	1852-1870
19387	Jilkova, Veronika, Frouz, Jan, Cajthaml, Tomas and Bonkowski, Michael	The role of bacteria and protists in nitrogen turnover in ant nest and forest floor material: A laboratory experiment	European Journal of Soil Biology	Wood ant nests are hotspots of nutrients and microbial activity in nutrient-limited coniferous forest ecosystems, as ants accumulate honeydew and nutrients in their nests due to foraging and building activities. In this study we carried out a microcosm experiment focussing on the role of bacteria and protozoa on carbon and nitrogen turnover in nutrient-rich and nutrient-poor litter materials. Two…	2015	69		66-73
19388	Joelsson, Klara, Hjalten, Joakim and Work, Timothy	Uneven-aged silviculture can enhance within stand heterogeneity and beetle diversity	Journal of Environmental Management	Uneven-aged silviculture may better maintain species assemblages associated with old-growth forests than clear felling in part due to habitat heterogeneity created by maintaining standing retention strips adjacent to harvest trails. Retention strips and harvest trails created at the time of tree removal will likely have different microclimate and may harbor different assemblages. In some cases, t…	2018	205		2019-01-08
19389	Johannesson, Karin M., Tonderski, Karin S., Ehde, Per Magnus and Weisner, Stefan E. B.	Temporal phosphorus dynamics affecting retention estimates in agricultural constructed wetlands	Ecological Engineering	Data from seven constructed wetlands (CWs) in the south of Sweden were analyzed to investigate the effects of water flow and season on inflow phosphorus (P) concentrations and temporal P retention variations in CWs receiving runoff from arable land. The form of P (dissolved or particulate) during different water flows (high and low) and seasons (warm and cold) was investigated using the results o…	2017	103		436-445
19390	Johannisson, C., Myrold, D. D. and Hogberg, P.	Retention of nitrogen by a nitrogen-loaded Scotch pine forest	Soil Science Society of America Journal	The rapacity of forests to store added N and how this excess N might interact with other nutrients is not well understood. We studied N retention in a Scotch pine (Pinus sylvestris L.) forest that had received two decades of annual additions of N as NH4NO3 at four rates (N0-N3, equivalent to 0, 36, 72 and 108 kg N ha(-1) yr(-1)), with and without supplementary additions of P and K. The highest N …	1999	63	2	383-389
19391	Johansson, M. B.	BIOMASS, DECOMPOSITION AND NUTRIENT RELEASE OF VACCINIUM-MYRTILLUS LEAF-LITTER IN 4 FOREST STANDS	Scandinavian Journal of Forest Research	Biomass and nutrient transfer (N, P, K, Ca, Mg) of bilberry (Vaccinium myrtillus L.) leaf litter fall, as well as decomposition and nutrient release. were studied in four mature forest stands situated in Central and South Sweden. Bilberry leaf litter fall amounted to between 33 and 55 kg ha-1 yr-1 in the four stands. Only minor differences between sites were noted for litter concentrations of N, …	1993	8	4	466-479
19392	Johansson, Therese, Hjalten, Joakim, de Jong, Johnny and von Stedingk, Henrik	Environmental considerations from legislation and certification in managed forest stands: A review of their importance for biodiversity	Forest Ecology and Management	Negative impacts of forestry on biodiversity have been addressed through environmental considerations held within legislation and various forest certification protocols. We used Sweden as a case study where a long history of forestry aiming at sustained yield of wood fiber has resulted in landscapes with low quantities of old growth structures e.g. dead wood and old forest, but where environmenta…	2013	303		98-112
19393	Johnson, R. K., Goedkoop, W. and Sandin, L.	Spatial scale and ecological relationships between the macroinvertebrate communities of stony habitats of streams and lakes	Freshwater Biology	1. Comparative studies of distinct, but not ecologically isolated, systems such as lakes and streams may improve our understanding of the importance of ecological linkages in aquatic ecosystems. 2. In this study we compared the macroinvertebrate benthos of stony habitats in Swedish lakes and streams. Community composition was used to evaluate zoogeographic patterns and functional feeding guilds w…	2004	49	9	1179-1194
19394	Johnson, Samuel, Strengbom, Joachim and Kouki, Jari	Low levels of tree retention do not mitigate the effects of clearcutting on ground vegetation dynamics	Forest Ecology and Management	Several new forestry practices directed at mitigating the influence of clear-cutting on biodiversity and other ecosystem properties have been launched recently. Retention forestry is the most widespread of these practices, but so far most studies have evaluated effects of retention levels that are higher than commonly applied by forestry in many parts of the world. Furthermore possible interactio…	2014	330		67-74
19395	Jonason, Dennis, Bergman, Karl-Olof, Westerberg, Lars and Milberg, Per	Land-use history exerts long-term effects on the clear-cut flora in boreonemoral Sweden	Applied Vegetation Science	QuestionsCan signs of 19th century grassland management, which can be observed in the flora immediately (2-4yrs) after clear-cutting in boreonemoral Sweden, still remain 4yrs later? Do the effects from the time since clear-cutting differ between forest and grassland plant species? LocationProvince of ostergotland, southern Sweden. MethodsTwelve contemporary clear-cut areas that were once meadows …	2016	19	4	634-643
19396	Jones, H. E., Hogberg, P. and Ohlsson, H.	NUTRITIONAL ASSESSMENT OF A FOREST FERTILIZATION EXPERIMENT IN NORTHERN SWEDEN BY ROOT BIOASSAYS	Forest Ecology and Management	Roots were excised from long-term nitrogen, phosphorus and potassium fertilisation experiments in a Pinus sylvestris plantation in northern Sweden, and tested for their ability to take up N-15, P-32 or Rb-86 from solutions of ammonium chloride, potassium dihydrogen phosphate and rubidium chloride. High levels of uptake in these tests indicate low nutrient status. At this site, lower uptake rates …	1994	64	1	59-69
19397	Jones, W. Daryl	USE OF INTERACTIVE LANDOWNER WORKSHOPS TO PROMOTE CONSERVATION, FEE-ACCESS OUTDOOR RECREATION, AND SUSTAINABLE DEVELOPMENT ON PRIVATELY-OWNED LANDS	Book	Mississippi landowners were found to diversify incomes from their lands through fee-access outdoor recreation, including hunting, angling, wildlife watching, and other nature-based activities. In 1998, fee-access hunting revenues ranged from US$2,964-$5,254 on average/landowner or $7.50-$14.28/ha (1). During 2005-2008, outdoor recreation increased Mississippi rural property values by 52% or $1,61…	2011
19398	Jonsell, M.	Insects on wood-decaying polypores: conservation aspects	Acta Universitatis Agriculturae Sueciae - Silvestria	Many insects living on dead wood (saproxylic insects) are threatened by modern silvicultural techniques since the quantities of dead trees has decreased. To provide data that may be useful when preserving those insect species, the insect communities living in one well-defined dead-wood microhabitat in Sweden were studied, viz. fruiting bodies of the polypores Fomitopsis pinicola and Fomes fomenta…	1999		93	179 pp.-179 pp.
19399	Jonsell, M.	Old park trees: a highly desirable resource for both history and beetle diversity	Journal of Arboriculture	Many saproxylic beetles (those that live on dead wood) are confined to old trees. Because old trees have generally decreased drastically in number, many of these beetles are now red-listed, which means that they are on a list of species that are considered threatened by extinction from the area (often a country) that the list covers. Beetles dependent on old trees are found primarily in small rem…	2004	30	4	238-244
19400	Jonsell, M.	Effects on biodiversity of forest fuel extraction, governed by processes working on a large scale	Biomass & Bioenergy	The question whether forest fuel extraction will affect biodiversity is ultimately a question of whether there will be species extinctions due to this practice. Quantitative predictions i.e. about how much habitat loss various species can tolerate, therefore require knowledge about processes that work over hundreds of square kilometres and over several years. Therefore, they are almost impossible…	2007	31	10	726-732
19401	Jonsell, Mats	Saproxylic beetle species in logging residues: which are they and which residues do they use?	Norwegian Journal of Entomology	Small-diameter wood is largely overlooked when considering Substrates used by saproxylic insects. Large amounts of such wood have always been retained after telling, in the form of logging residues. However, recent interest in renewable energy sources has made the extraction of such logging residues profitable. If this continues, saproxylic insects will have less substrate in which to breed. To d…	2008	55	1	109-122
19402	Jonsell, M., Nitterus, K. and Stighall, K.	Saproxylic beetles in natural and man-made deciduous high stumps retained for conservation	Biological Conservation	Intensive forest management in Scandinavia has decreased the amount of dead wood required by saproxylic (wood-living) organisms. To reduce this problem, some dead wood is now retained during forest operations, often in the form of man-made high stumps (ca. 4 m high). Most often these stumps are cut with a harvester, although the stumps in this study were made with explosives. The aims of this stu…	2004	118	2	163-173
19403	Jonsell, M. and Weslien, J.	Felled or standing retained wood - it makes a difference for saproxylic beetles	Forest Ecology and Management	High stumps are often retained at clear cuttings to increase the abundance of habitat patches for saproxylic (wood living) insects. However, these high stumps constitutes a very uniform dead wood habitat which probably supports only a part of the saproxylic fauna. Therefore, we compared the saproxylic fauna of high spruce stumps with the fauna of long and short felled holes of spruce. We also inv…	2003	175	2019-01-03	425-435
19404	Jonsson, A. M. and Nihlgard, B.	Slash pile burning at a Norway spruce clear-cut in southern Sweden	Water Air and Soil Pollution	The effect of burning piles of slash on a Norway spruce clear-cut in southern Sweden was followed for 3 years. The vegetation cover, soil chemistry, soil water at a depth of 30 - 40 cm and runoff water were studied. The burnt plots were without vegetation for several months after burning, while the control plots were almost totally covered by Deschampsia flexuosa and Galium saxatile. The remainin…	2004	158	1	127-135
19405	Jonsson, A. M., Rosengren, U. and Nihlgard, B.	Excess nitrogen affects the frost sensitivity of the inner bark of Norway spruce	Annals of Forest Science	The sensitivity to frost in the living inner bark of trees have been hypothesised to be influenced by acid rain and N deposition through changes in nutrient balance and carbon metabolism. At the Skogaby experimental site, situated in southern Sweden, Norway spruce in control plots, plots fertilized with ammonium sulphate and plots fertilized with mineral nutrients except N were compared in this r…	2004	61	4	293-298
19406	Jonsson, Bengt Gunnar, Ekstrom, Magnus, Esseen, Per-Anders, Grafstrom, Anton, Stahl, Goran and Westerlund, Bertil	Dead wood availability in managed Swedish forests - Policy outcomes and implications for biodiversity	Forest Ecology and Management	Dead wood is a critical resource for forest biodiversity and widely used as an indicator for sustainable forest management. Based on data from the Swedish National Forest Inventory we provide baseline information and analyze trends in volume and distribution of dead wood in Swedish managed forests during 15 years. The data are based on approximate to 30,000 sample plots inventoried during three p…	2016	376		174-182
19407	Jonsson, Magnus, Bertilsson, Maria, Ehrlen, Johan and Lonn, Mikael	Genetic divergence of climatically marginal populations of Vicia pisiformis on the Scandinavian Peninsula	Hereditas	Vicia pisiformis L. is a perennial leguminous plant with a main distribution in broadleaved forest-steppes of eastern Europe. The species is classified as endangered (EN) according to the IUCN red-lists in both Norway and Sweden, due to severe fragmentation, small population sizes and continuing population decline. The populations on the Scandinavian Peninsula constitute the northern limit of the…	2008	145	1	2019-01-08
19408	Jonsson, M., Dimitriou, I., Aronsson, P. and Elowson, T.	Effects of soil type, irrigation volume and plant species on treatment of log yard run-off in lysimeters	Water Research	Wet storage of timber and pulpwood produces large quantities of run-off water. A study was conducted to determine the purification efficiency of soil-plant systems for log yard run-off. Sixteen 1200-1 lysimeters (1.2 m deep soil columns) with clay or sand soil were planted with willow (Salix sp.) or alder (Alnus glutinosa), and irrigated with run-off from a Norway spruce (Picea abies) log yard. D…	2004	38	16	3634-3642
19409	Jonsson, M., Dimitriou, I., Aronsson, P. and Elowson, T.	Treatment of log yard run-off by irrigation of grass and willows	Environmental Pollution	Log yard run-off is a potential environmental risk, among other things because it creates an oxygen deficiency in receiving watercourses. This study was conducted to investigate the purification efficiency of soil-plant systems with couchgrass (Elymus repens) and willows (Salix sp.) when intensively irrigated with run-off from an open sprinkling system at a Norway spruce (Picea abies) log yard. T…	2006	139	1	157-166
19410	Jonsson, Mattias, Ranius, Thomas, Ekvall, Hans and Bostedt, Goran	Cost-effectiveness of silvicultural measures to increase substrate availability for wood-dwelling species: A comparison among boreal tree species	Scandinavian Journal of Forest Research	This study analysed the cost-effectiveness of silvicultural measures that increase substrate availability for saproxylic (wood-dwelling) species. Mixed stands of Norway spruce (Picea abies L.), Scots pine (Pinus sylvestris L.) and birch (Betula pubescens Ehrh and Betula pendula Roth) or aspen (Populus tremula L.) in three regions of Sweden were modelled. Inverted cost-effectiveness was calculated…	2010	25	1	46-60
19411	Jonsson, M., Ranius, T., Ekvall, H., Bostedt, G., Dahlberg, A., Ehnstrom, B., Norden, B. and Stokland, J. N.	Cost-effectiveness of silvicultural measures to increase substrate availability for red-listed wood-living organisms in Norway spruce forests	Biological Conservation	It is important that measures to maintain biodiversity are taken in a way that is cost-effective for the landowner. We analyzed the cost-effectiveness of silvicultural measures that aim at increasing the substrate availability for red-listed (species that are threatened, near threatened or where species probably are threatened but data is deficient) saproxylic (wood-inhabiting) organisms. We mode…	2006	127	4	443-462
19412	Jonsson, Mari T., Fraver, Shawn, Jonsson, Bengt Gunnar, Dynesius, Mats, Rydgard, Mats and Esseen, Per-Anders	Eighteen years of tree mortality and structural change in an experimentally fragmented Norway spruce forest	Forest Ecology and Management	Long-term experimental forest fragmentation studies remain uncommon, despite their critical role in the advancement of ecological theory and conservation planning. In 1986 five circular forest fragments (1/16-1 ha) were exposed through clearcutting within an old-growth Norway spruce (Picea abies) forest in northern Sweden. Initial responses to fragmentation (1986-1991) showed very high tree morta…	2007	242	2019-02-03	306-313
19413	Jonsson, Mari T. and Jonsson, Bengt Gunnar	Assessing coarse woody debris in Swedish woodland key habitats: Implications for conservation and management	Forest Ecology and Management	In the mainland Nordic countries and the Baltic States, the delineation and set-aside of woodland key habitats (WKHs) has been one important approach to conserving biodiversity outside traditional protected areas. Though the specifics of the key habitat concept differ from country to country, the intent is to set aside forest areas that (1) exhibit a low degree of exploitation, (2) host or potent…	2007	242	2019-02-03	363-373
19414	Jorstad, I.	What is the correct botanical name of the Apple scab fungus?	Nyt Magazin for Naturvidenskaberne	Sydow has shown (Ann. mycol., Berl, xxi, [p. 171], 1923) that the apple scab fungus, commonly known as Venturia inaequalis (Cke) Aderh., or more correctly as V. inaequalis (Cke) Wint. (emend. Aderh.) [R.A.M, xv, p. 467], does not properly, belong to the genus Venturia. He accordingly transferred it to his new genus Endostigme as E. inaequalis (Cke) Syd. Petrak (Ann. mycol., Berl, xxxviii, p. 193,…	1943	84		251-253
19415	Josefsson, Sarah, Bergknut, Magnus, Futter, Martyn N., Jansson, Stina, Laudon, Hjalmar, Lundin, Lisa and Wiberg, Karin	Persistent Organic Pollutants in Streamwater: Influence of Hydrological Conditions and Landscape Type	Environmental Science & Technology	Concentrations of polychlorinated dibenzo-p-dioxins and dibenzofurans (PCDD/Fs), polychlorinated biphenyls (PCBs), and hexachlorobenzene (HCB) in streamwater were measured in a remote catchment in northern Sweden and downstream to the Baltic Sea. Sampling took place at seven sites during two years and under different hydrological conditions: during the snow-free, snow-covered, and spring-flood se…	2016	50	14	7416-7424
19416	Juday, Glenn P., Barber, Valerie, Duffy, Paul, Linderholm, Hans, Rupp, Scott, Sparrow, Steve, Vaganov, Eugene, Yarie, John, Simon, Carolyn, Arris, Lelani and Heal, Bill	Forests, land management, and agriculture	Book	The boreal region covers about 17% of global land area, and the arctic nations together contain about 31% of the global forest (non-boreal and boreal).The boreal forest is affected by and also contributes to climate change through its influence on the carbon cycle and albedo. Boreal forests influence global levels of atmospheric carbon dioxide and other greenhouse gases by taking up carbon dioxid…	2005
19417	Junninen, Kaisa, Kouki, Jari and Renvall, Pertti	Restoration of natural legacies of fire in European boreal forests: an experimental approach to the effects on wood-decaying fungi	Canadian Journal of Forest Research	Effective fire suspension in Fennoscandian boreal forests has caused a number of species to become threatened. To compensate for the negative ecological impacts of fire elimination, prescribed burning of forests as a restoration method has been introduced recently. We studied the effects of controlled burning on assemblages of wood-decaying polypores (Basidiomycota), including red-listed species,…	2008	38	2	202-215
19418	Junninen, Kaisa, Penttila, Reijo and Martikainen, Petri	Fallen retention aspen trees on clear-cuts can be important habitats for red-listed polypores: a case study in Finland	Biodiversity and Conservation	Green-tree retention is a relatively new forestry application, which aims at decreasing the negative effects of clear-cut logging on forest biodiversity. In this study, the value of retained aspens in maintaining diverse assemblages of wood-decaying fungi (polypores; Basidiomycota) on clear-cuts was investigated, after the retention trees had died, fallen and started to decay. A total of 110 fall…	2007	16	2	475-490
19419	Juriado, I. and Liira, J.	Threatened forest lichen Lobaria pulmonaria - its past, present and future in Estonia	Forestry Studies / Metsanduslikud Uurimused	Lobaria pulmonaria is a conspicuous and widely known epiphytic lichen species which mainly occurs on mature hardwood trees in old forests. The distribution of L. pulmonaria has become highly fragmented, showing a decline across Europe. Lobaria pulmonaria is unevenly distributed among ca. 600 localities in Estonia. Most localities are in north-eastern and south-western Estonia (50% and 21% of reco…	2010	53		15-24
19420	Juskaitis, Rimvydas, Balciauskas, Linas and Siozinyte, Vita	NEST SITE PREFERENCE OF FOREST DORMOUSE DRYOMYS NITEDULA (PALLAS) IN THE NORTH-WESTERN CORNER OF THE DISTRIBUTION RANGE	Polish Journal of Ecology	Lithuania is situated in the very north-western corner of the large distribution range of the forest dormouse Dryomys nitedula and it might be considered that dormouse habitats should be both different and sub-optimal in this area in comparison to central parts of the range. The aims of the present study were to analyse which vegetation parameters determine nest site preference of D. nitedula and…	2012	60	4	815-826
19421	Juutilainen, Katja, Monkkonen, Mikko, Kotiranta, Heikki and Halme, Panu	The effects of forest management on wood-inhabiting fungi occupying dead wood of different diameter fractions	Forest Ecology and Management	Forest management has caused severe ecological degradation throughout the Globe. One of its most prominent consequences is the drastic change in dead wood profile and consequently in the dead wood dependent biota. Wood-inhabiting fungi are, considering ecosystem functions, the most important species group utilizing dead wood, because they take care of majority of the decaying process. The earlier…	2014	313		283-291
19422	Kaarakka, Lilli, Hyvonen, Riitta, Stromgren, Monika, Palviainen, Marjo, Persson, Tryggve, Olsson, Bengt A., Launonen, Erno, Vegerfors, Birgitta and Helmisaari, Helja-Sisko	Carbon and nitrogen pools and mineralization rates in boreal forest soil after stump harvesting	Forest Ecology and Management	The use of forest-derived biomass has steadily increased in Finland and Sweden during the past decades leading to more intensive forest management practices in the region, such as whole-tree harvesting, both above- and belowground. Stump harvesting results in a direct removal of stump and coarse-root carbon (C) from the stand and can cause extensive soil disturbance, which has been suggested to i…	2016	377		61-70
19423	Kaarlejarvi, Elina, Hoset, Katrine S. and Olofsson, Johan	Mammalian herbivores confer resilience of Arctic shrub-dominated ecosystems to changing climate	Global Change Biology	Climate change is resulting in a rapid expansion of shrubs in the Arctic. This expansion has been shown to be reinforced by positive feedbacks, and it could thus set the ecosystem on a trajectory toward an alternate, more productive regime. Herbivores, on the other hand, are known to counteract the effects of simultaneous climate warming on shrub biomass. However, little is known about the impact…	2015	21	9	3379-3388
19424	Kahl, Tiemo and Bauhus, Juergen	An index of forest management intensity based on assessment of harvested tree volume, tree species composition and dead wood origin	Nature Conservation-Bulgaria	Forest management intensity often affects biodiversity, ecosystem processes and ecosystem services. To assess the influence of past management intensity on current ecosystem properties, management intensity must be quantified in a meaningful and reproducible approach. Here we developed the simple yet effective Forest Management Intensity index (ForMI), which is based only on inventory data of the…	2014		7	15-27
19425	Kaiser, K., Guggenberger, G. and Zech, W.	Sorption of DOM and DOM fractions to forest soils	Geoderma	The sorption of total, hydrophilic, and hydrophobic dissolved organic matter (DOM)) on 125 forest soil samples was studied in batch experiments. The soil samples represented the main soil orders of temperate climatic zones: Entisols, Inceptisols, Alfisols, Mollisols, and Spodosols. In general, sorption was adequately described by the linear initial mass isotherm. At zero addition of DOM, the rele…	1996	74	2019-03-04	281-303
19426	Kakizawa, Hiroaki	Comparative study on administrative organizations for forest policy (with Finland and New Zealand as case studies)	Journal of Forest Research	Currently, many researchers argue in favor of decentralization, as it facilitates more locally based and innovative forest policy. However, many local government administrations, especially those of municipalities, lack sufficient resources to function efficiently under a decentralized regime. There is an urgent need to reassess administrative systems that can handle both decentralization and res…	2004	9	2	147-155
19427	Kallio, Minna, Jussila, Matti, Rissanen, Taija, Anttila, Piia, Hartonen, Kari, Reissell, Anni, Vreuls, Rene, Adahchour, Mohamed and Hyotylainen, Tuulia	Comprehensive two-dimensional gas chromatography coupled to time-of-flight mass spectrometry in the identification of organic compounds in atmospheric aerosols from coniferous forest	Journal of Chromatography A	Comprehensive two-dimensional gas chromatography coupled to time-of-flight mass spectrometry (GC x GC-TOF-MS) was applied in the identification of organic compounds in atmospheric aerosols from coniferous forest. The samples were collected at Hyytiala, Finland, as part of the QUEST campaign, in Spring 2003. Manual and automated search procedures were compared in the identification. An automated p…	2006	1125	2	234-243
19428	Kalo, P. and Nederstrom, A.	FEMALE-SPECIFIC COMPOUNDS IN THE OVARIES OF THE LARGE PINE WEEVIL, HYLOBIUS-ABIETIS L (COLEOPTERA, CURCULIONIDAE)	Annales Entomologici Fennici		1986	52	3	95-+
19429	Kalyakin, A. B.	Elk damage to spruce plantations in relation to methods of cleaning and weeding	Lesnoe Khozyaistvo	Norway spruce plantations in the Moscow region, established at an initial density of 1600 plants per ha, were given various cleaning and weeding treatments at 7 yr old (when the spruce were 1.5-2 m high). Data are presented on spruce d.b.h. at 14 yr by treatment, and also on the amount and type of damage by elk (Alces alces). The best light conditions and spruce growth were achieved by 2 treatmen…	1986		8	53-55
19430	Kammer, Adrian, Schmidt, Michael W. I. and Hagedorn, Frank	Decomposition pathways of C-13-depleted leaf litter in forest soils of the Swiss Jura	Biogeochemistry	Decomposition of leaf litter and its incorporation into the mineral soil are key components of the C cycle in forest soils. In a C-13 tracer experiment, we quantified the pathways of C from decomposing leaf litter in calcareous soils of a mixed beech forest in the Swiss Jura. Moreover, we assessed how important the cold season is for the decomposition of freshly fallen leaves. The annual C loss f…	2012	108	2019-01-03	395-411
19431	Kammermann, Lukas, Gysel, Martin, Weingartner, Ernest, Herich, Hanna, Cziczo, Daniel J., Holst, Thomas, Svenningsson, Birgitta, Arneth, Almut and Baltensperger, Urs	Subarctic atmospheric aerosol composition: 3. Measured and modeled properties of cloud condensation nuclei	Journal of Geophysical Research-Atmospheres	Aerosol particles can modify cloud properties by acting as cloud condensation nuclei (CCN). Predicting CCN properties is still a challenge and not properly incorporated in current climate models. Atmospheric particle number size distributions, hygroscopic growth factors, and polydisperse CCN number concentrations were measured at the remote subarctic Stordalen mire, 200 km north of the Arctic Cir…	2010	115
19432	Kana, Jiri, Kopacek, Jiri, Tahovska, Karolina and Santruckova, Hana	Tree dieback and related changes in nitrogen dynamics modify the concentrations and proportions of cations on soil sorption complex	Ecological Indicators	The soil sorption complex in an unmanaged mountain forest (Plane Lake catchment, Czech Republic) changed substantially during the decade following forest dieback in 2004-2008, when a bark beetle outbreak killed > 90% of mature Norway spruce stands. All downfallen biomass remained in the catchment. Leaching of Ca2+, Mg2+, K+, H+ and ionic Al from the catchment increased after tree dieback and was …	2019	97		319-328
[truncated: 1,085 more rows]

## Sheet: After title filtering
18806	Andersson, Jon, Gomez, Eva Domingo, Michon, Sophie and Roberge, Jean-Michel	Tree cavity densities and characteristics in managed and unmanaged Swedish boreal forest	Scandinavian Journal of Forest Research	In forests worldwide, similar to 10-40% of bird and mammal species require cavities for nesting or roosting. Although knowledge of tree cavity availability and dynamics has increased during past decades, there is a striking lack of studies from boreal Europe. We studied the density and characteristics of cavities and cavity-bearing trees in three categories of forest in a north-Swedish landscape:…	2018	33	3	233-244
[truncated: 270 more rows]

[truncated: 5 more sheets: After abstract filtering, After whole-text filtering, Refs added from other sources, Finally kept refs, Classification of refs]
